# Supplementary material for: Coupling reaction between electron-rich pyrimidinones and α-amino acids promoted by phosphonium salts
Source: Royal Society of Chemistry journal article supplement (doi:10.1039/c1ob05313b), 2011-01-01

## Electronic Supplementary Information

### Coupling reaction between electron-rich pyrimidinones and $\alpha$ -amino acids promoted by phosphonium salts

Abdelatif ElMarrouni, Josep M. Fabrellas and Montserrat Heras\*

*Department of Chemistry, Faculty of Sciences, University of Girona, Campus de Montilivi, E-17071, Girona, Spain.*

[montserrat.heras@udg.edu](mailto:montserrat.heras@udg.edu)

#### Table of contents

|                                                                     |     |
|---------------------------------------------------------------------|-----|
| Instruments                                                         | S3  |
| Analysis of optical purity of pyrimidin-4-yl amino esters <b>12</b> | S3  |
| Synthesis of Dipeptides <b>20</b> . General procedure               | S4  |
| HPLC conditions                                                     | S4  |
| HPLC of dipeptide <b>20a</b> ( <b>12b</b> )                         | S5  |
| HPLC of dipeptide <b>20b</b> ( <b>12b</b> )                         | S5  |
| HPLC of dipeptide <b>20a</b> ( <b>12c</b> )                         | S6  |
| HPLC of dipeptide <b>20b</b> ( <b>12c</b> )                         | S6  |
| HPLC of dipeptide <b>20b</b> ( <b>12c</b> )                         | S7  |
| <sup>1</sup> H-NMR of compound <b>7a</b>                            | S8  |
| <sup>13</sup> C-NMR and DEPT experiment of compound <b>7a</b>       | S9  |
| <sup>1</sup> H-NMR of compound <b>7b</b>                            | S10 |
| <sup>13</sup> C-NMR and DEPT experiment of compound <b>7b</b>       | S11 |
| <sup>1</sup> H-NMR of compound <b>7c</b>                            | S12 |
| <sup>13</sup> C-NMR and DEPT experiment of compound <b>7c</b>       | S13 |
| <sup>1</sup> H-NMR of compound <b>7e</b>                            | S14 |
| <sup>13</sup> C-NMR and DEPT experiment of compound <b>7e</b>       | S15 |
| <sup>1</sup> H-NMR of compound <b>8</b>                             | S16 |
| <sup>13</sup> C-NMR and DEPT experiment of compound <b>8</b>        | S17 |
| <sup>1</sup> H-NMR of compound <b>10</b>                            | S18 |
| <sup>13</sup> C-NMR and DEPT experiment of compound <b>10</b>       | S19 |
| <sup>1</sup> H-NMR of compound <b>11</b>                            | S20 |
| <sup>13</sup> C-NMR and DEPT experiment of compound <b>11</b>       | S21 |
| <sup>1</sup> H-NMR of compound <b>16aa</b>                          | S22 |
| <sup>13</sup> C-NMR and DEPT experiment of compound <b>16aa</b>     | S23 |
| <sup>1</sup> H-NMR of compound <b>16ab</b>                          | S24 |
| <sup>13</sup> C-NMR and DEPT experiment of compound <b>16ab</b>     | S25 |
| <sup>1</sup> H-NMR of compound <b>16ac</b>                          | S26 |

|                                                                                        |     |
|----------------------------------------------------------------------------------------|-----|
| <sup>13</sup> C-NMR and DEPT experiment of compound <b>16ac</b>                        | S27 |
| <sup>1</sup> H-NMR of compound <b>16ae</b>                                             | S28 |
| <sup>13</sup> C-NMR and DEPT experiment of compound <b>16ae</b>                        | S29 |
| <sup>1</sup> H-NMR of compound <b>16ba</b>                                             | S30 |
| <sup>13</sup> C-NMR and DEPT experiment of compound <b>16ba</b>                        | S31 |
| <sup>1</sup> H-NMR of compound <b>16bb</b>                                             | S32 |
| <sup>13</sup> C-NMR and DEPT experiment of compound <b>16bb</b>                        | S33 |
| <sup>1</sup> H-NMR of compound <b>16bc</b>                                             | S34 |
| <sup>13</sup> C-NMR of compound <b>16bc</b>                                            | S35 |
| <sup>1</sup> H-NMR of compound <b>16bd</b>                                             | S36 |
| <sup>13</sup> C-NMR and DEPT experiment of compound <b>16bd</b>                        | S37 |
| <sup>1</sup> H-NMR and <sup>13</sup> C-NMR and DEPT experiment of compound <b>16be</b> | S38 |
| <sup>13</sup> C-NMR and DEPT experiment of compound <b>16be</b>                        | S39 |
| <sup>1</sup> H-NMR of compound <b>17b</b>                                              | S40 |
| <sup>13</sup> C-NMR and DEPT experiment of compound <b>17b</b>                         | S41 |
| <sup>1</sup> H-NMR of compound <b>12a</b>                                              | S42 |
| <sup>13</sup> C-NMR of compound <b>12a</b>                                             | S43 |
| <sup>1</sup> H-NMR of compound <b>12b</b>                                              | S44 |
| <sup>13</sup> C-NMR and DEPT experiment of compound <b>12b</b>                         | S45 |
| <sup>1</sup> H-NMR of compound <b>12c</b>                                              | S46 |
| <sup>13</sup> C-NMR and DEPT experiment of compound <b>12c</b>                         | S47 |
| <sup>1</sup> H-NMR of compound <b>12d</b>                                              | S48 |
| <sup>13</sup> C-NMR of compound <b>12d</b>                                             | S49 |
| HSQC-ed experiment of compound <b>12d</b>                                              | S50 |
| <sup>1</sup> H-NMR of compound <b>12e</b>                                              | S51 |
| <sup>13</sup> C-NMR and DEPT experiment of compound <b>12e</b>                         | S52 |
| <sup>1</sup> H-NMR of compound <b>18a</b>                                              | S53 |
| <sup>13</sup> C-NMR and DEPT experiment of compound <b>18a</b>                         | S54 |
| <sup>1</sup> H-NMR of compound <b>18b</b>                                              | S55 |
| <sup>13</sup> C-NMR and DEPT experiment of compound <b>18b</b>                         | S56 |
| <sup>1</sup> H-NMR of compound <b>18c</b>                                              | S57 |
| <sup>13</sup> C-NMR and DEPT experiment of compound <b>18c</b>                         | S58 |
| HSQC-ed experiment of compound <b>18c</b>                                              | S59 |
| NOESY of compound experiment <b>12b</b>                                                | S60 |

## Instruments

High performance liquid chromatography (HPLC) was performed on a Summit Dionex instruments composed of P680 binary pump, UVD 170U 4-Channel UV-Vis Detector, ASI-100 Autosampler and the Chromaleon 6.60 software from Dionex, on a C18 Kromasil reverse-phase column (4.6 x 40 mm; 3.5  $\mu$ m particle size). ESI-MS analyses were performed with an Esquire 6000 ESI ion Trap LC/MS (Bruker Daltonics) instrument equipped with an electrospray ion source. The instrument was operated in the positive ESI(+) ion mode.

### Analysis of optical purity of pyrimidin-4-yl amino esters **12**

The optical purity of compounds **12** was verified by coupling with both racemic phenylalanine and L-phenylalanine in order to measure the degree of racemisation by HPLC. Thus, samples of *N* $^{\alpha}$ -Boc amino esters **12** were deprotected using lithium hydroxide to give amino acids **19** in near quantitative yield. These compounds were first coupled to resin bound racemic phenylalanine **20a** using standard protocols for solid-phase peptide synthesis following Fmoc/*tert*-butyl strategy. After cleavage from the resin, the HPLC analyses of the resulting dipeptides **20a** showed the formation of two diastereoisomers. Dipeptides **20b** were then synthesized analogously by coupling *N* $^{\alpha}$ -Boc amino acids **12** to L-phenylalanine resin bound **20b**. When no reasonable racemisation occurred during the synthesis of **12**, HPLC analyses of **20b** showed the formation of one single diastereoisomer (Scheme 1).<sup>1</sup>

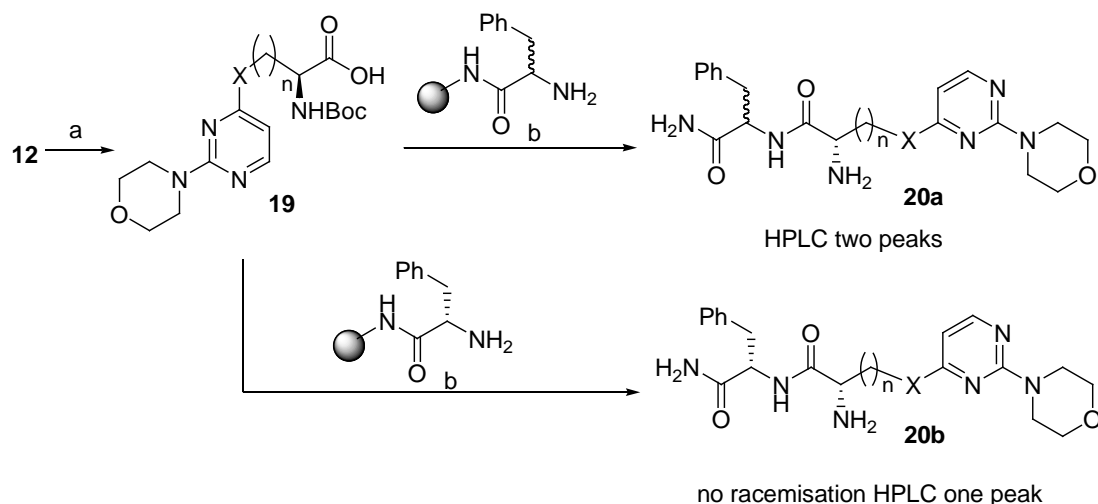

**Scheme 1.** Solid-phase synthesis of dipeptides **20**. Reagents and conditions: (a) LiOH, THF/MeOH/H<sub>2</sub>O (1:2:2), room temp., 3–4 h. (b) (i) HBTU, DIEA, DMF, room temp., 3 h; (ii) TFA/H<sub>2</sub>O/TIS (95:2.5:2.5), room temp., 2 h.

<sup>1</sup> Optical purity of compounds **10** and **12e** was also verified following Scheme 2.

**Synthesis of Dipeptides 20 General procedure.** Dipeptides **20** were prepared manually by solid-phase method using Fmoc-Rink-MBHA resin (0.64 mmol/g) as solid support following standard Fmoc-strategy. Coupling of amino acids were mediated by HBTU (3 equiv) and DIEA (3 equiv) in DMF at room temperature for 3 h. Monitoring was carried out by ninhydrin test.<sup>2</sup> Washings were performed with DMF (6 x 1 min). Fmoc group was removed by treating the resin with 30% piperidine in DMF (v/v) and washed with DMF (6 x 1 min). The Fmoc-Rink-MBHA resin (10 mg) was placed into a plastic syringe fitted with a polypropylene frit to remove the Fmoc group and subsequently couple Fmoc-Phe-OH. After Fmoc group removal resin was treated with pyrimidinyl amino acid **19** under coupling conditions. The resulting dipeptides were deprotected and cleaved from resin by treatment with TFA/H<sub>2</sub>O/TIS (95:2.5:2.5) for 2 h. Then the solvents were evaporated to dryness and the crude dipeptides **20** were dissolved in H<sub>2</sub>O, lyophilized and tested for purity on HPLC. Electrospray ionisation mass spectrometry was used to confirm peptide identity.

#### HPLC conditions

Solvent A: H<sub>2</sub>O/0.1% TFA

Solvent B: CH<sub>3</sub>CN/0.1% TFA

Linear gradient of (2-100%) B at flow rate of 1.0 mL/min over 17 min.

---

<sup>2</sup> Kaiser, E.; Colescott, R. L.; Bossinger, C. D.; Cook, P. I. *Anal. Biochem.* **1970**, *34*, 595-598

## HPLC of dipeptide 20a (12b)

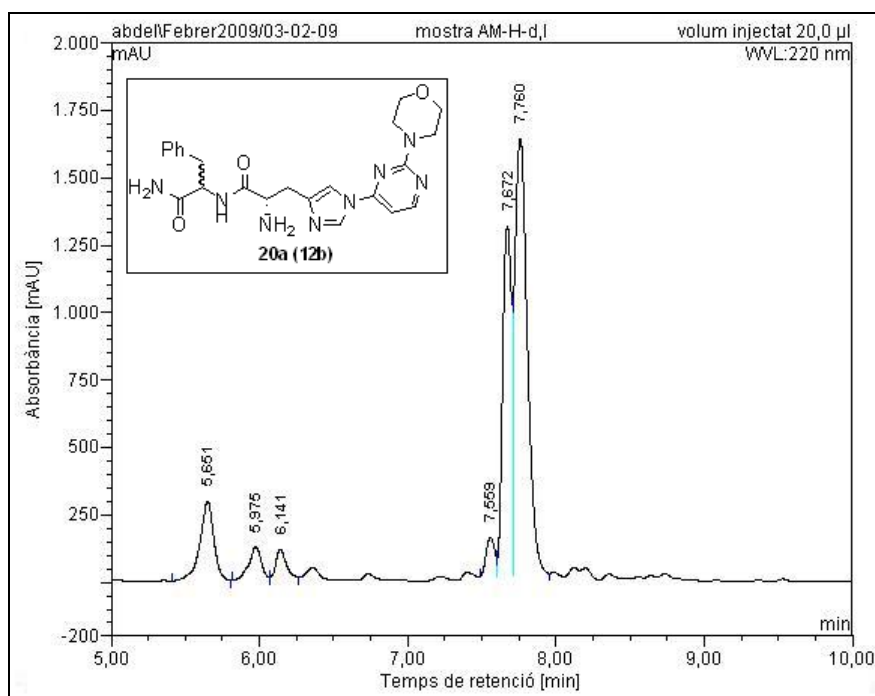

## HPLC of dipeptide 20b (12b)

Reaction performed with conditions D at 50°C (entry 6, Table 3)

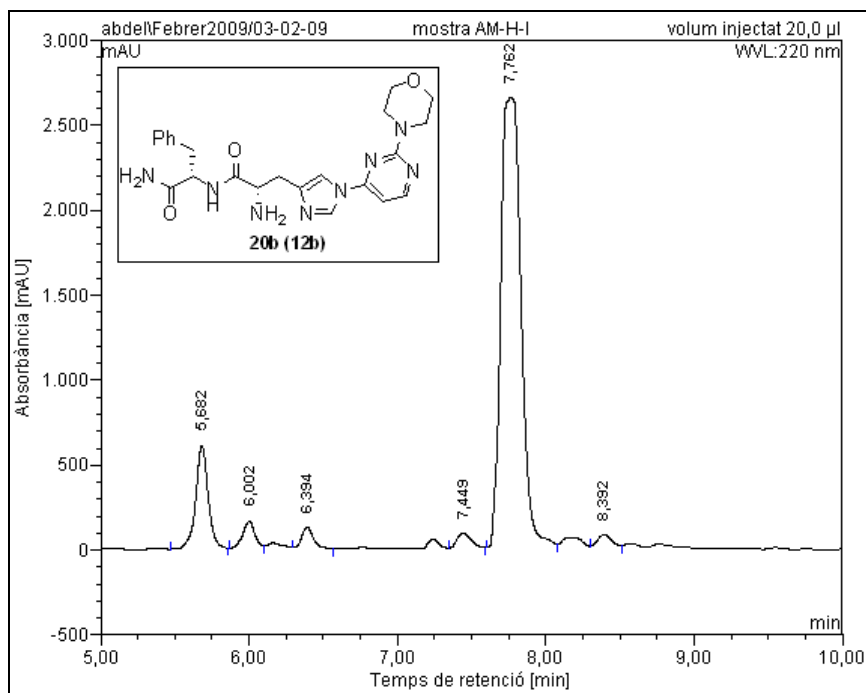

### HPLC of dipeptide 20a (12c)

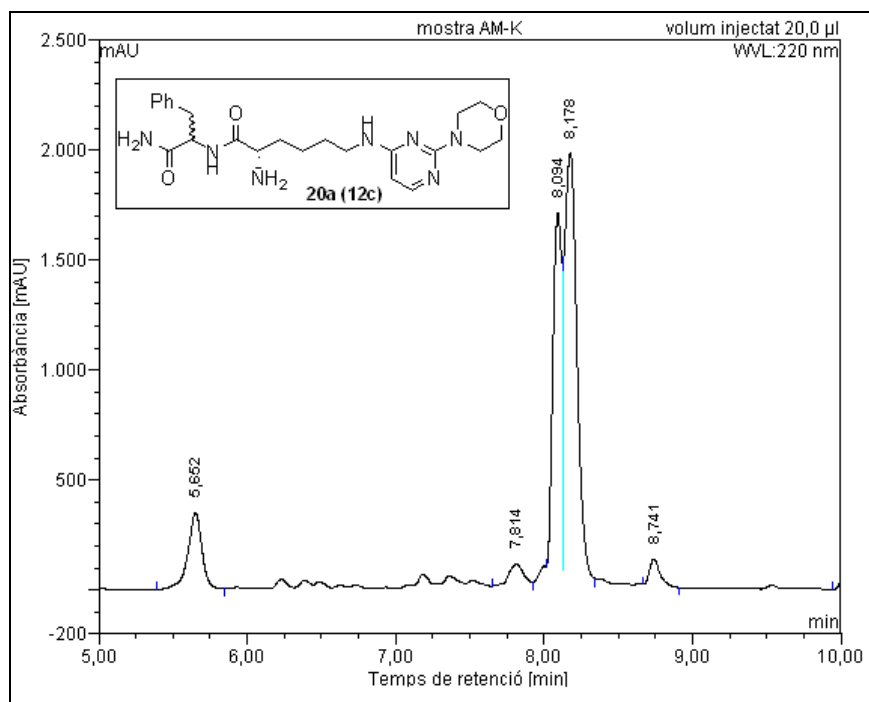

### HPLC of dipeptide 20b (12c)

Reaction performed with conditions B at 50°C (entry 7, Table 3)

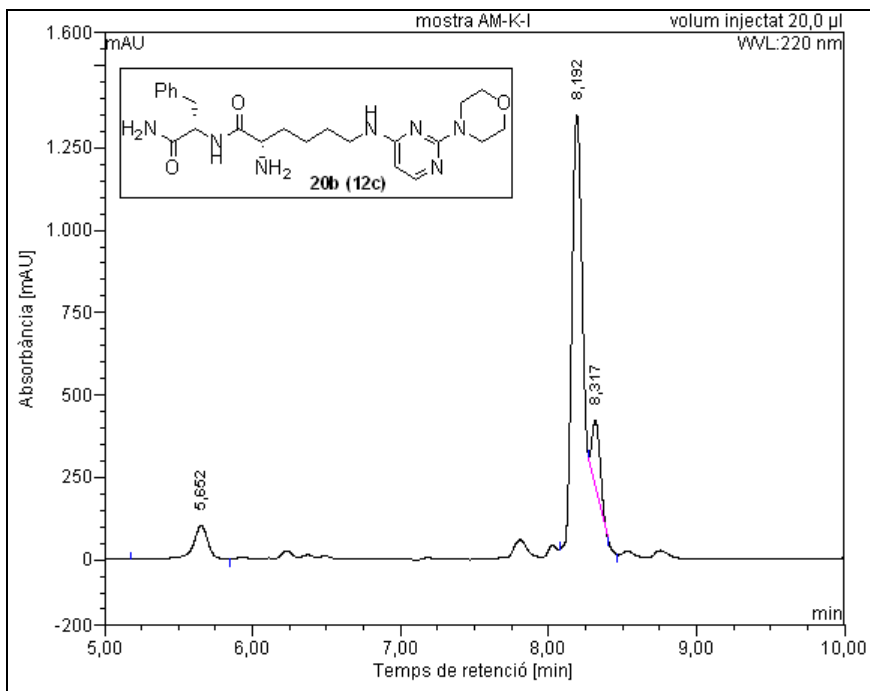

## HPLC of dipeptide 20b (12c)

Reaction performed with conditions D at 40°C (entry 10, Table 3)

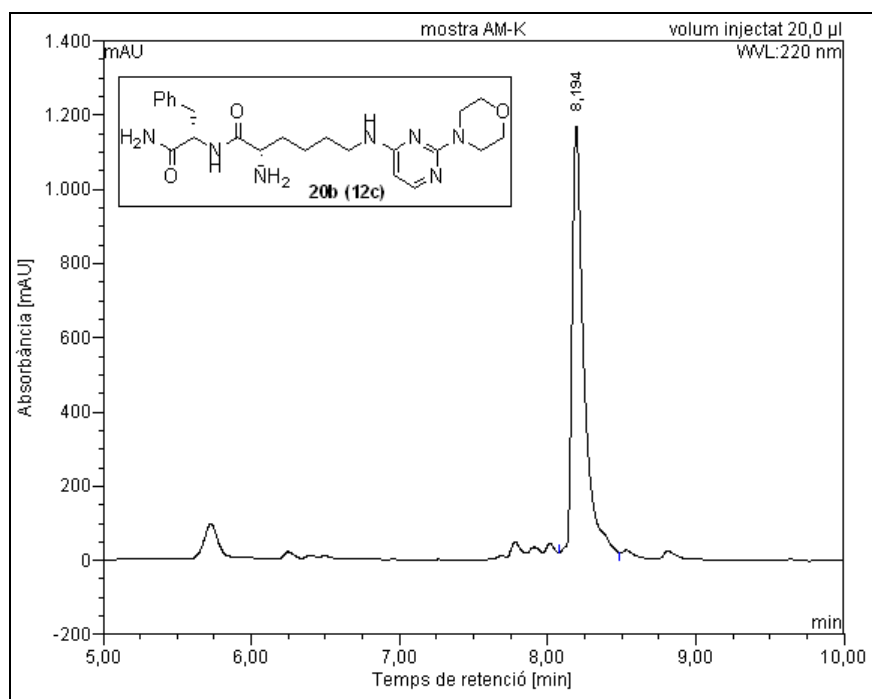

<sup>1</sup>H-NMR of compound **7a**

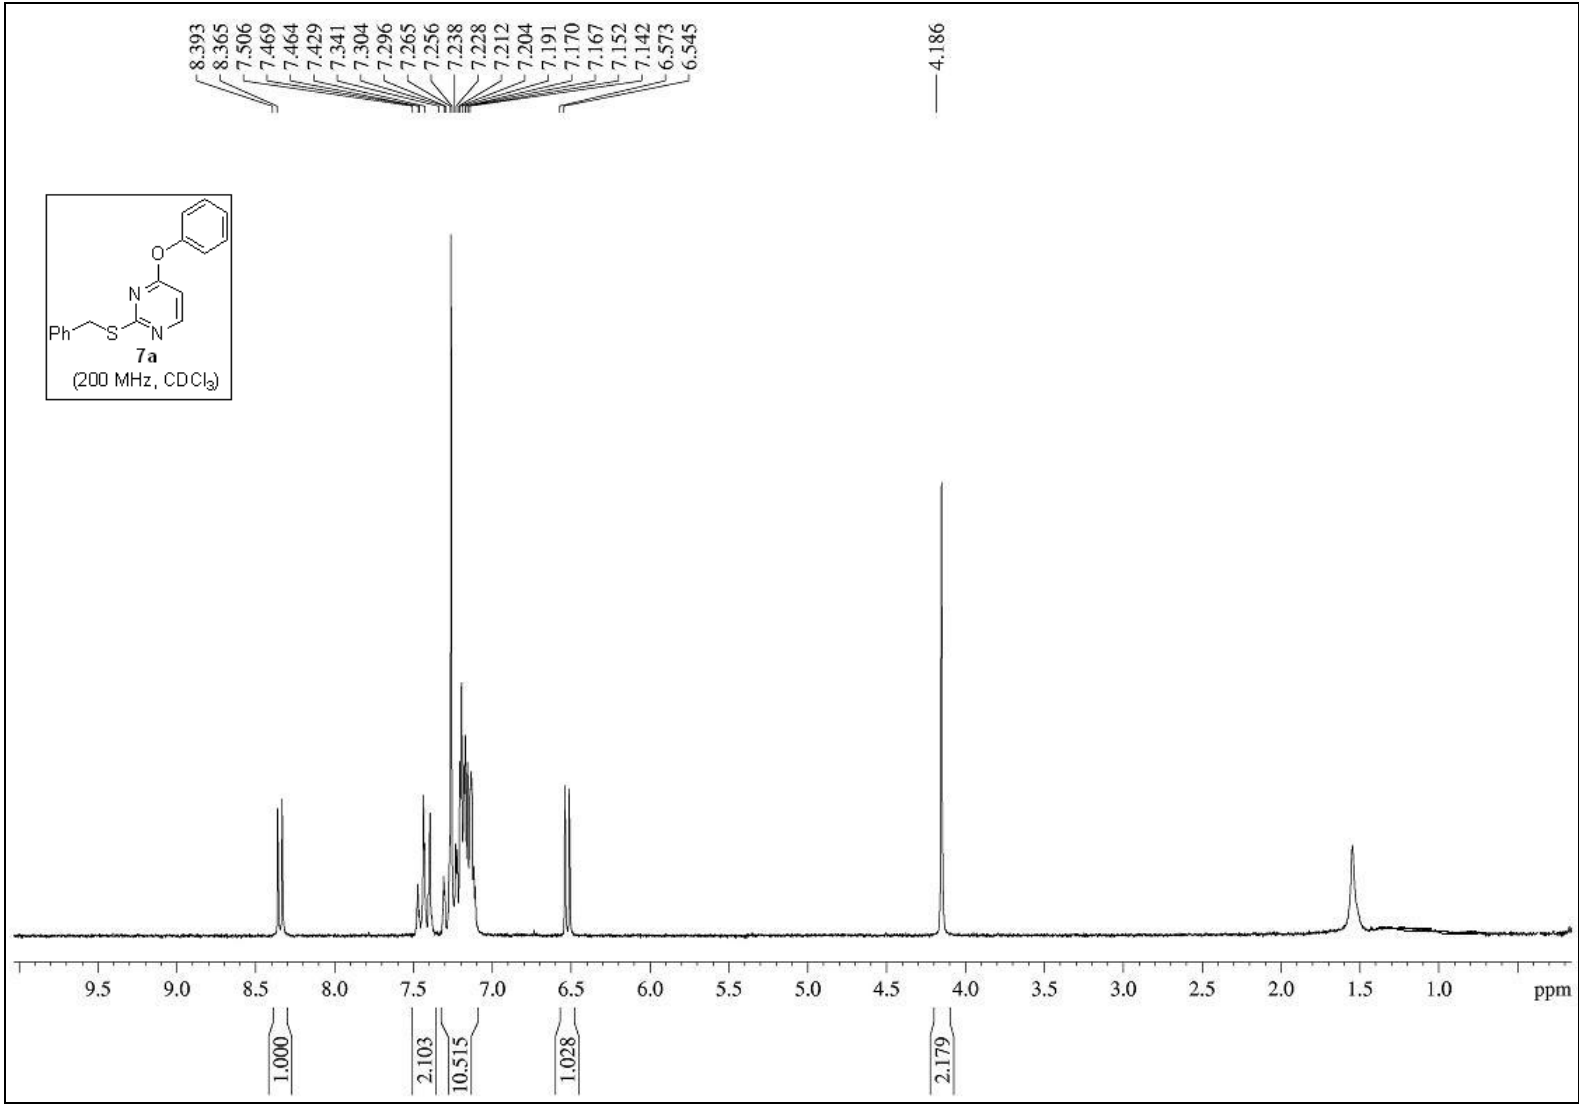

**$^{13}\text{C}$ -NMR and DEPT experiment of compound **7a****

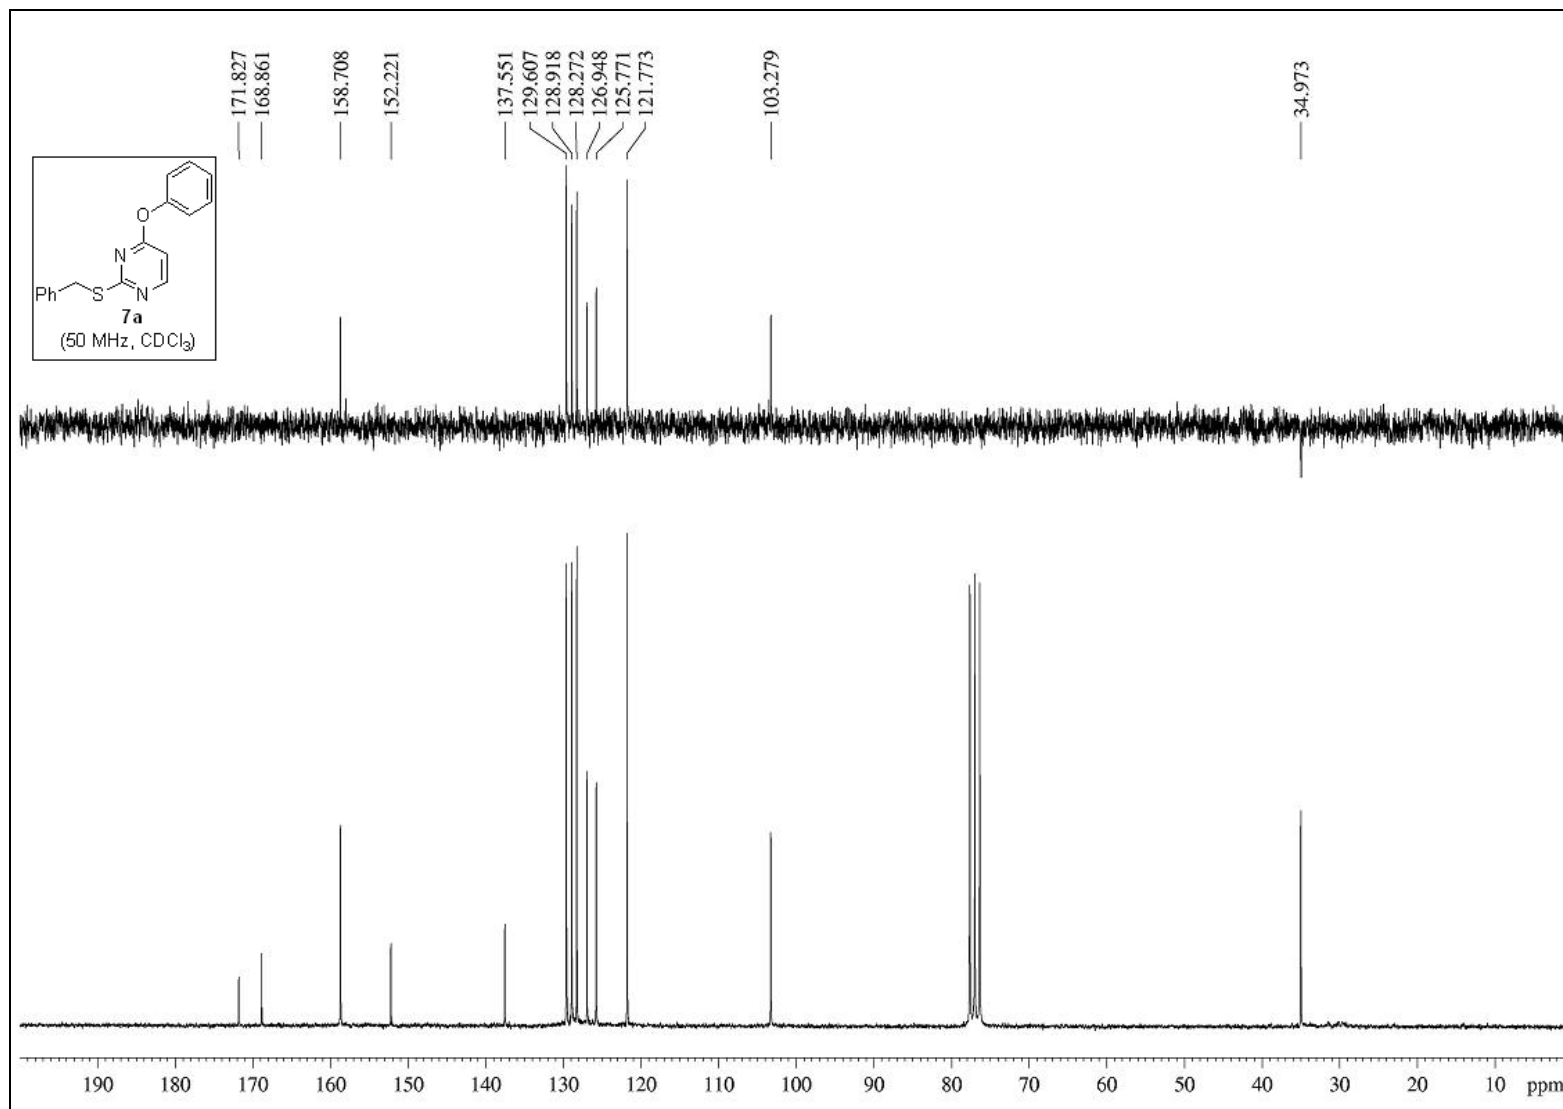

<sup>1</sup>H-NMR of compound 7b

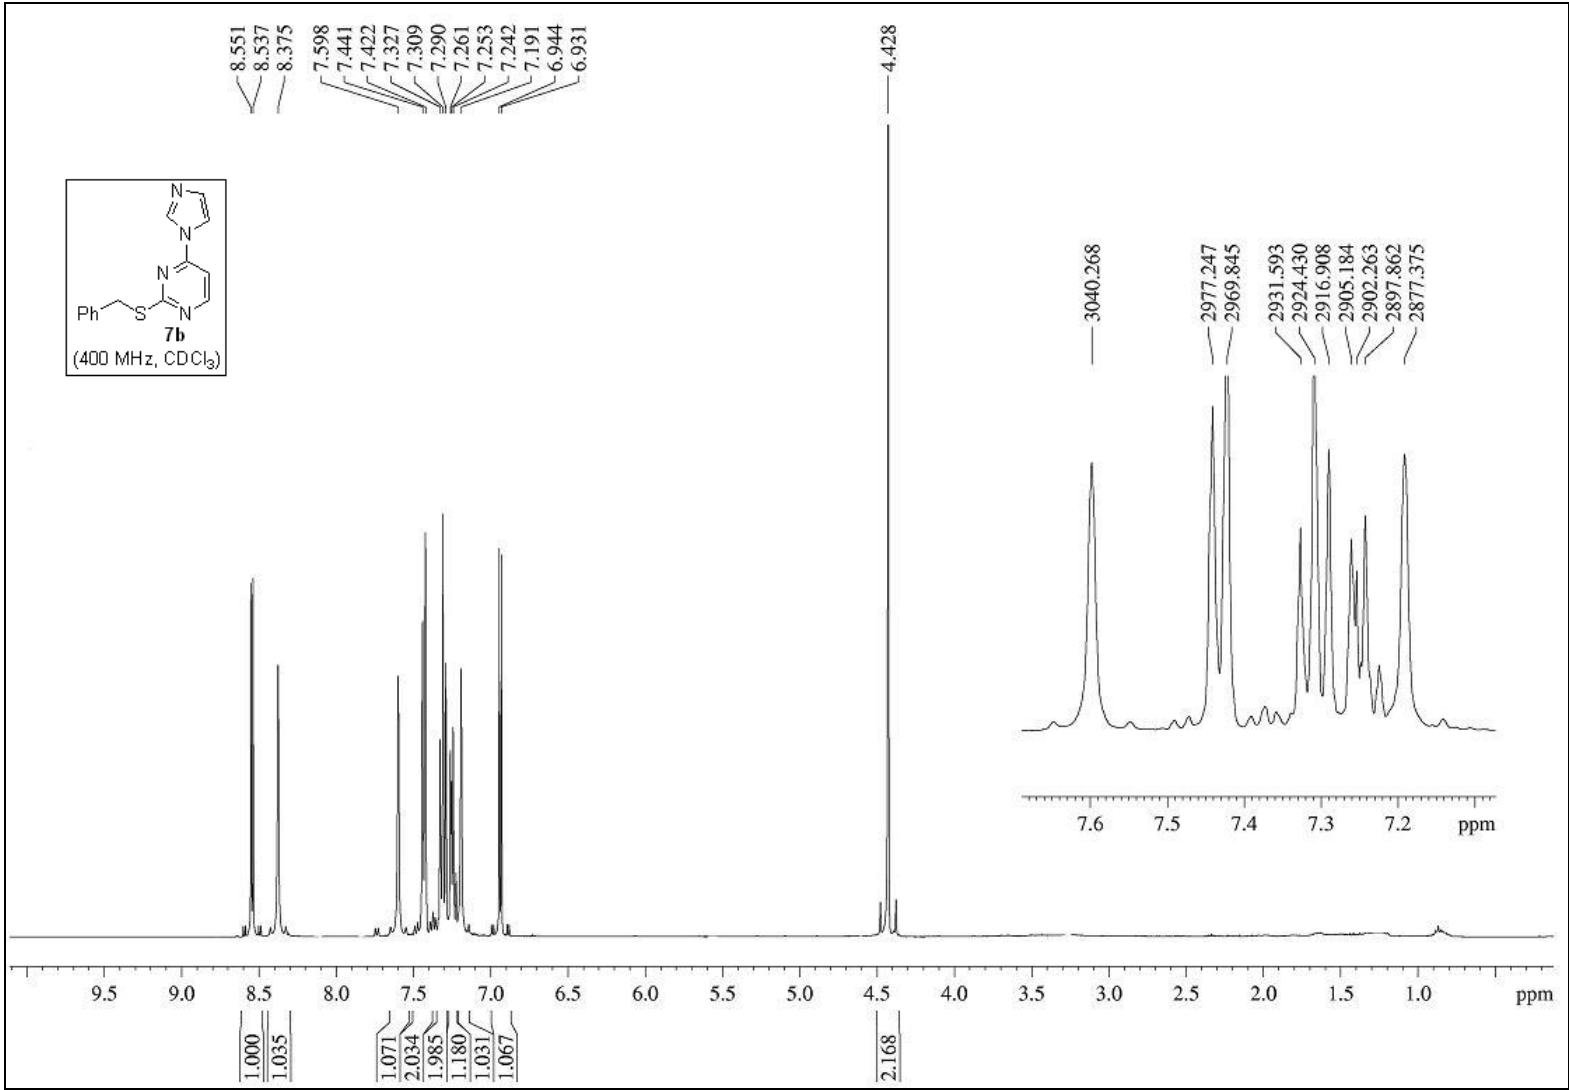

<sup>13</sup>C-NMR and DEPT experiment of compound **7b**

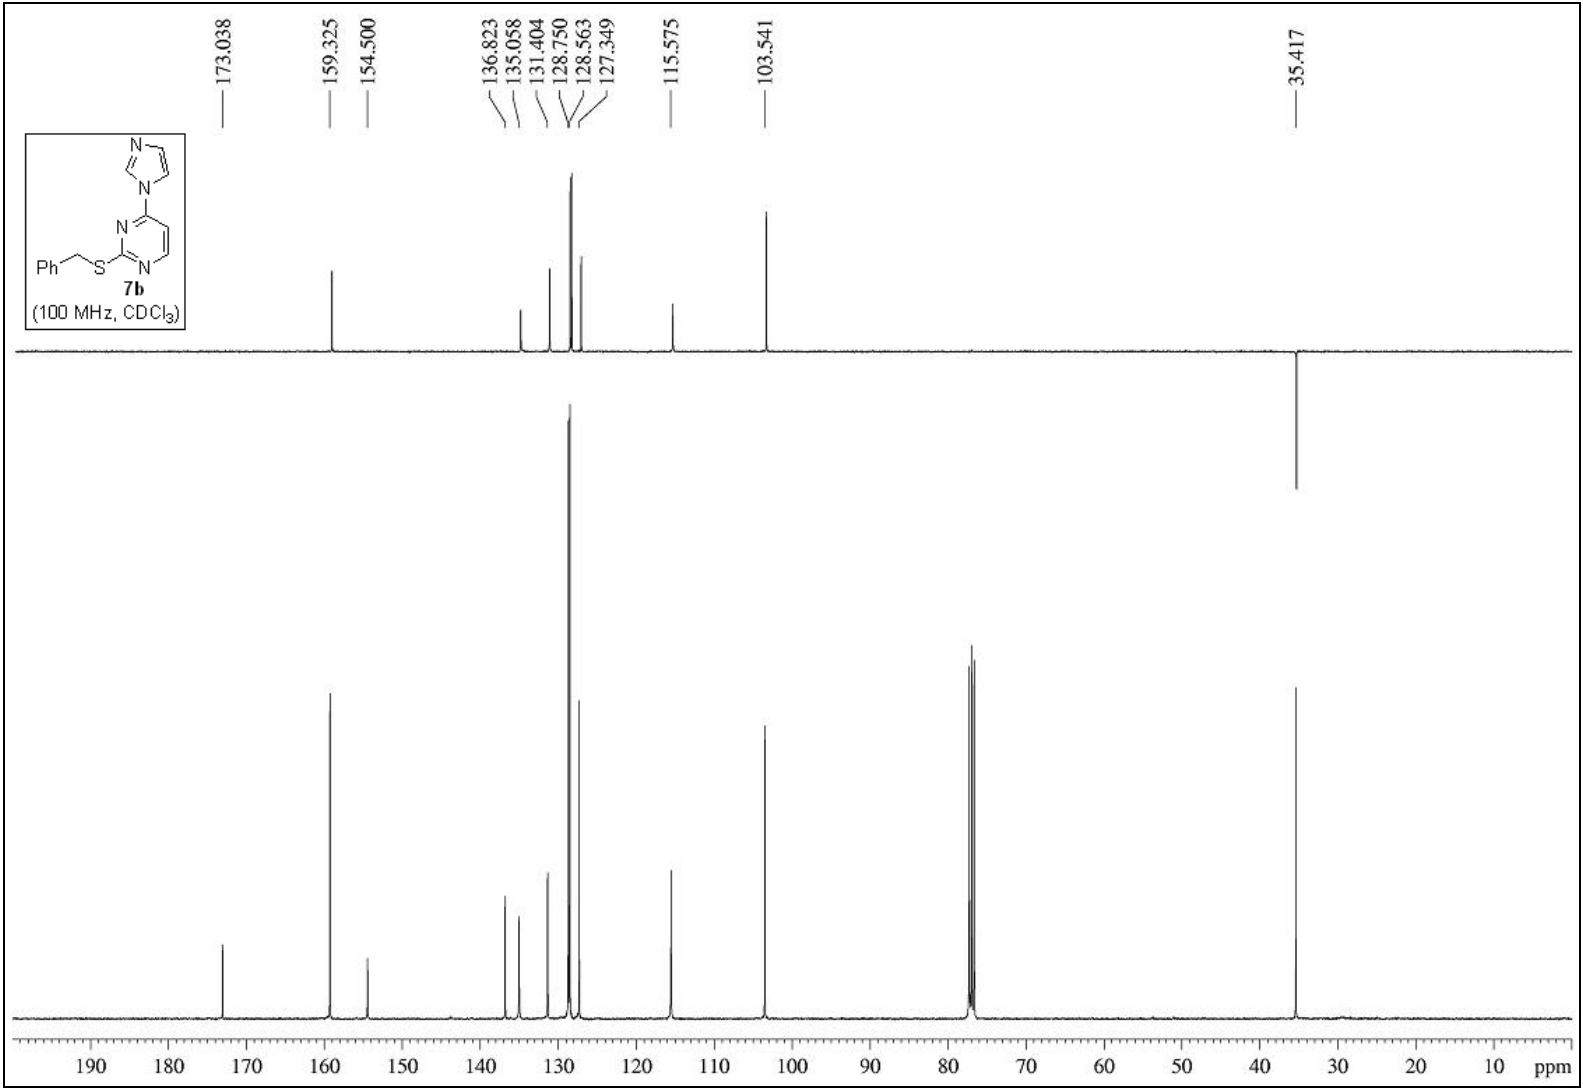

# <sup>1</sup>H-NMR of compound 7c

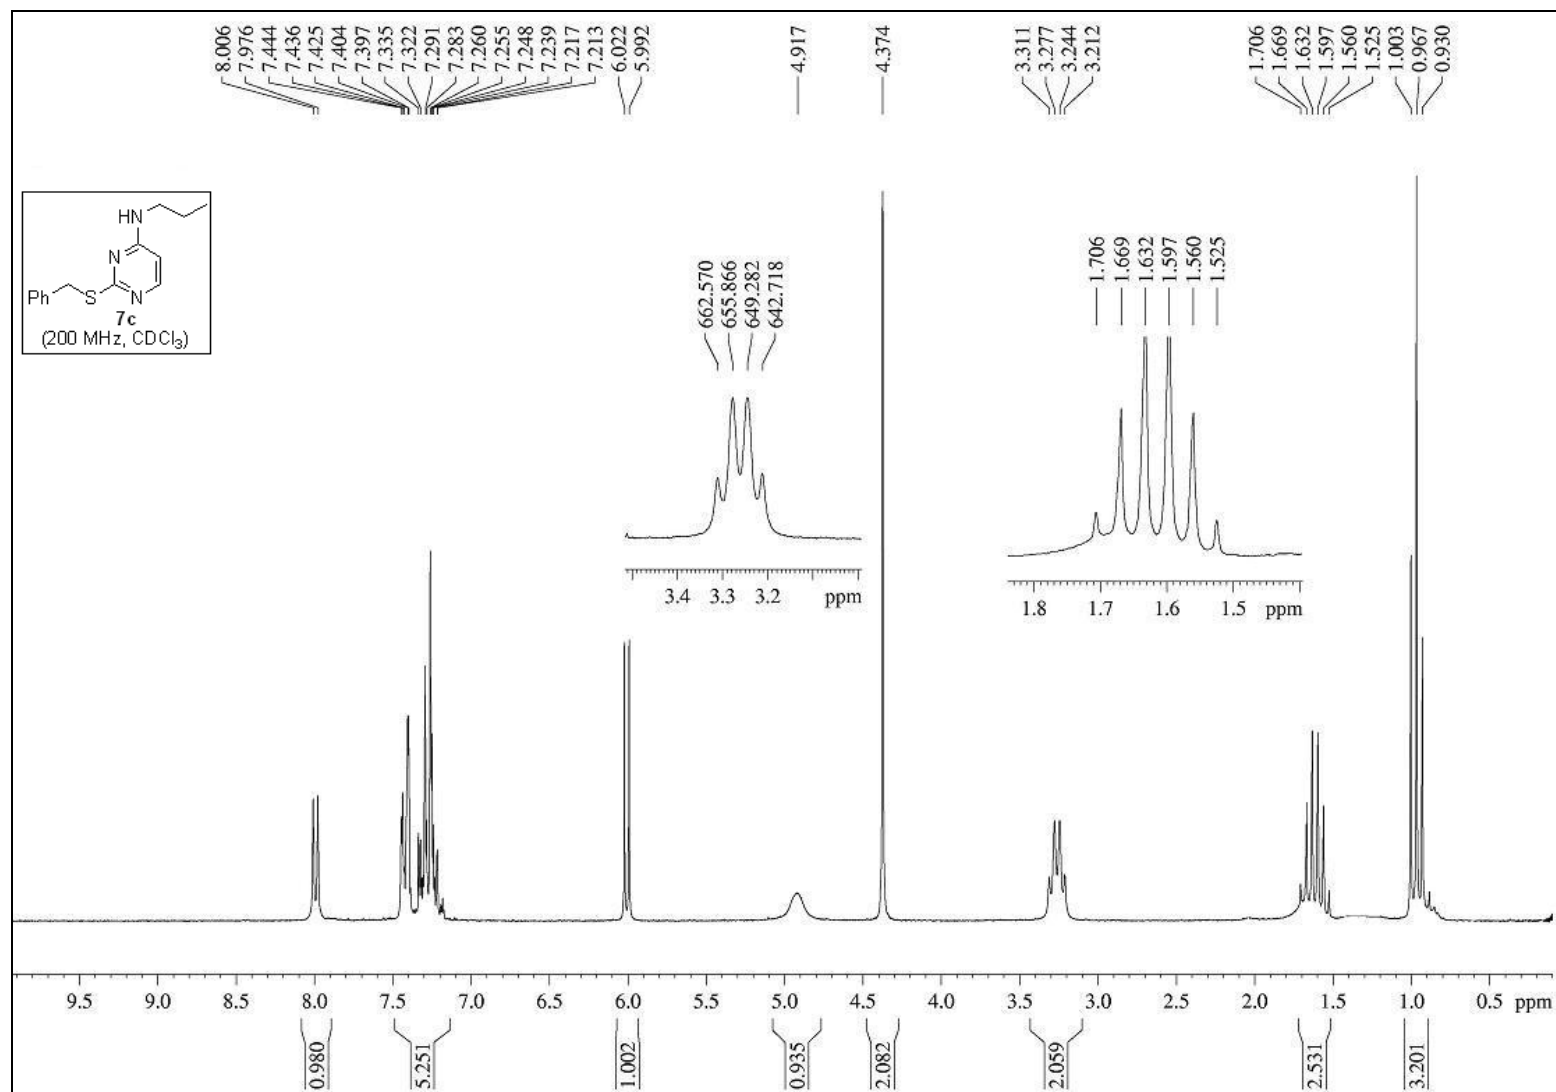

**$^{13}\text{C}$ -NMR and DEPT experiment of compound **7c****

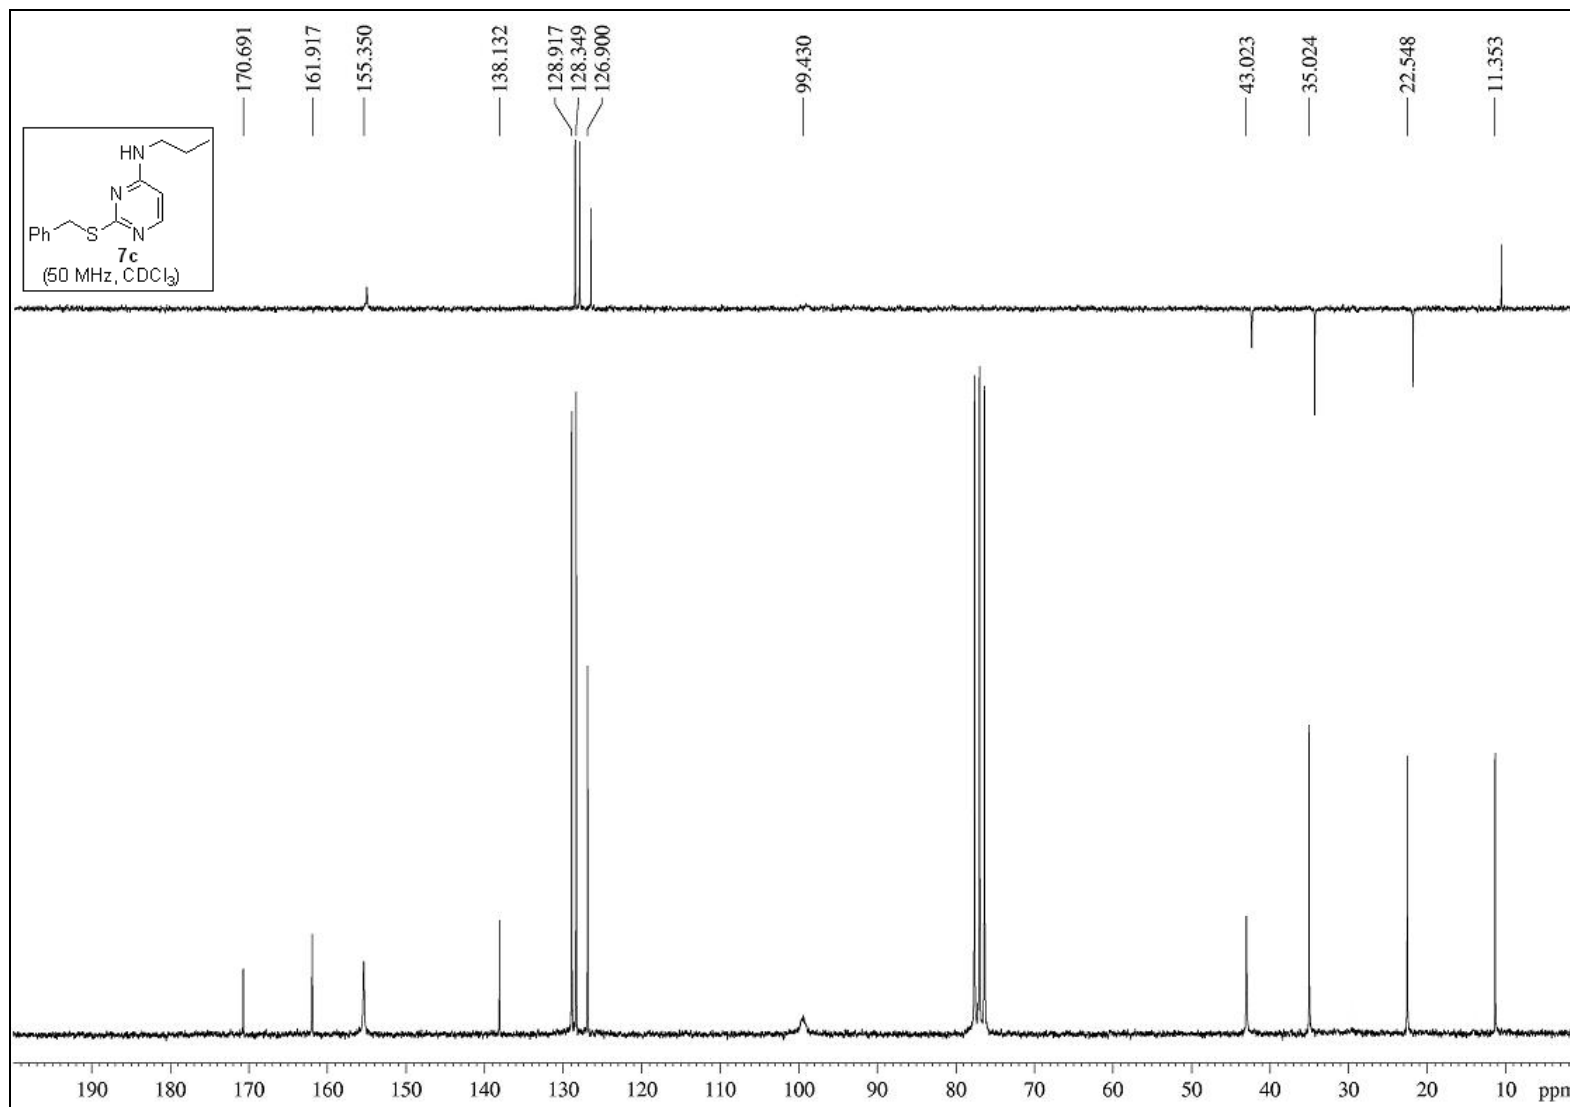

<sup>1</sup>H-NMR of compound **7e**

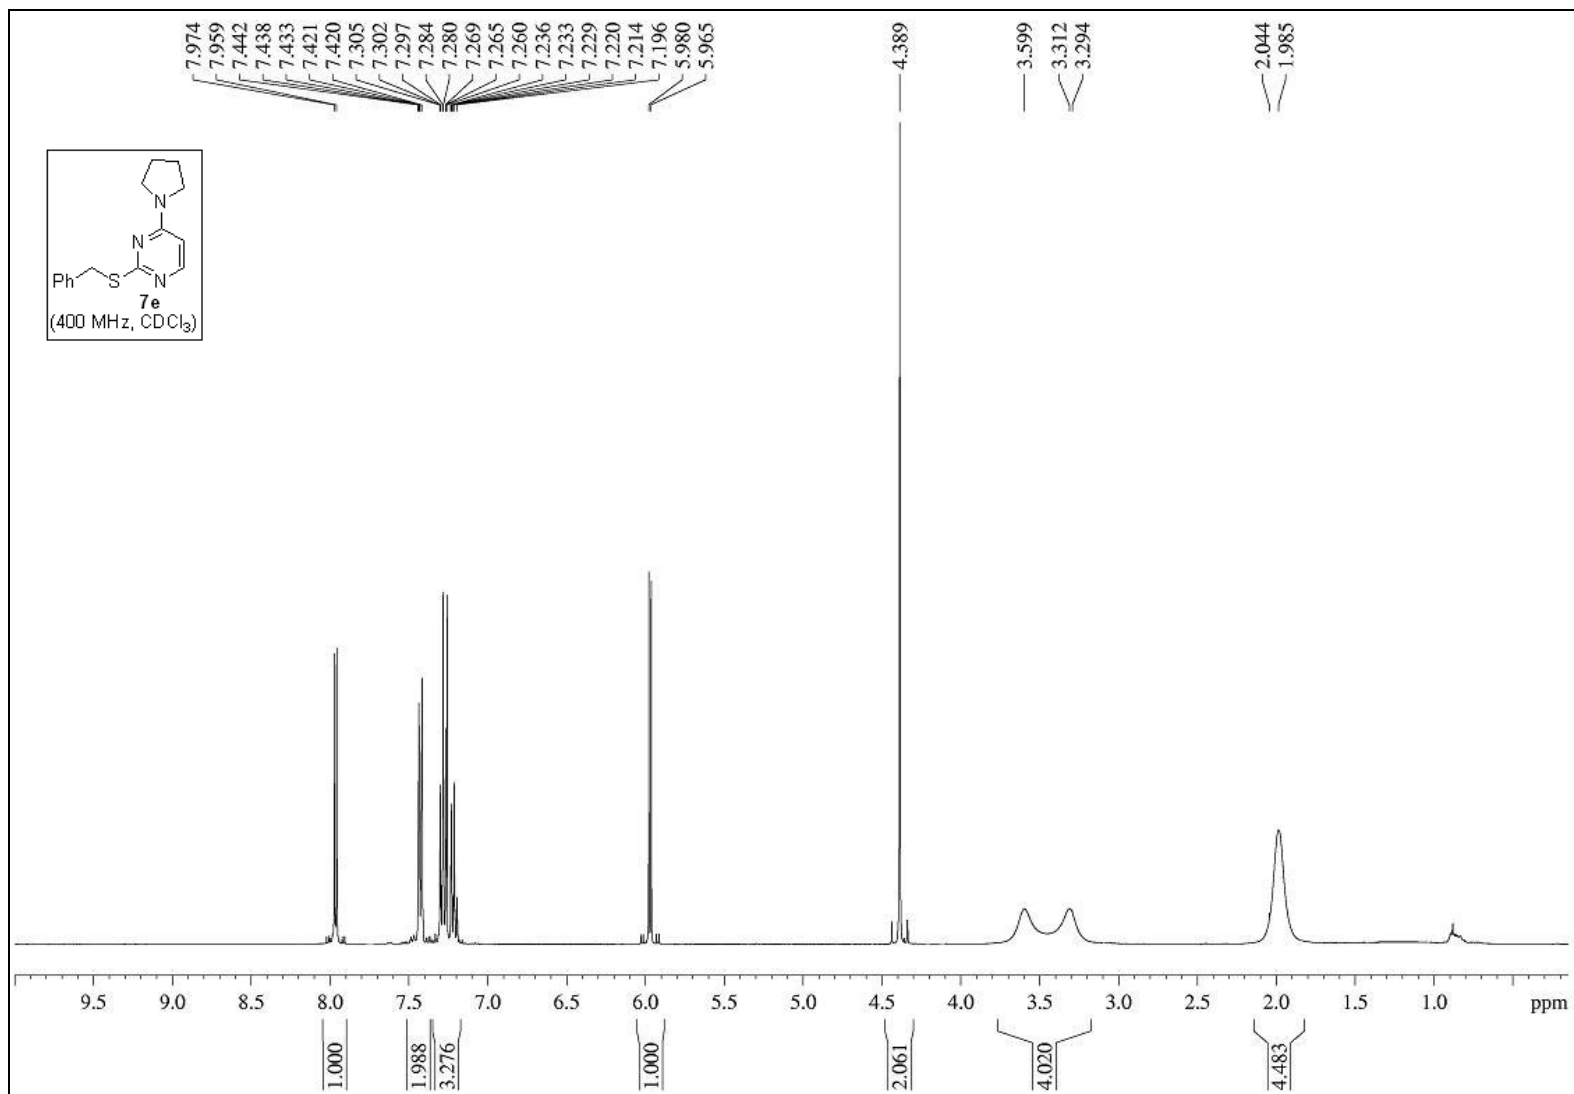

**$^{13}\text{C}$ -NMR and DEPT experiment of compound **7e****

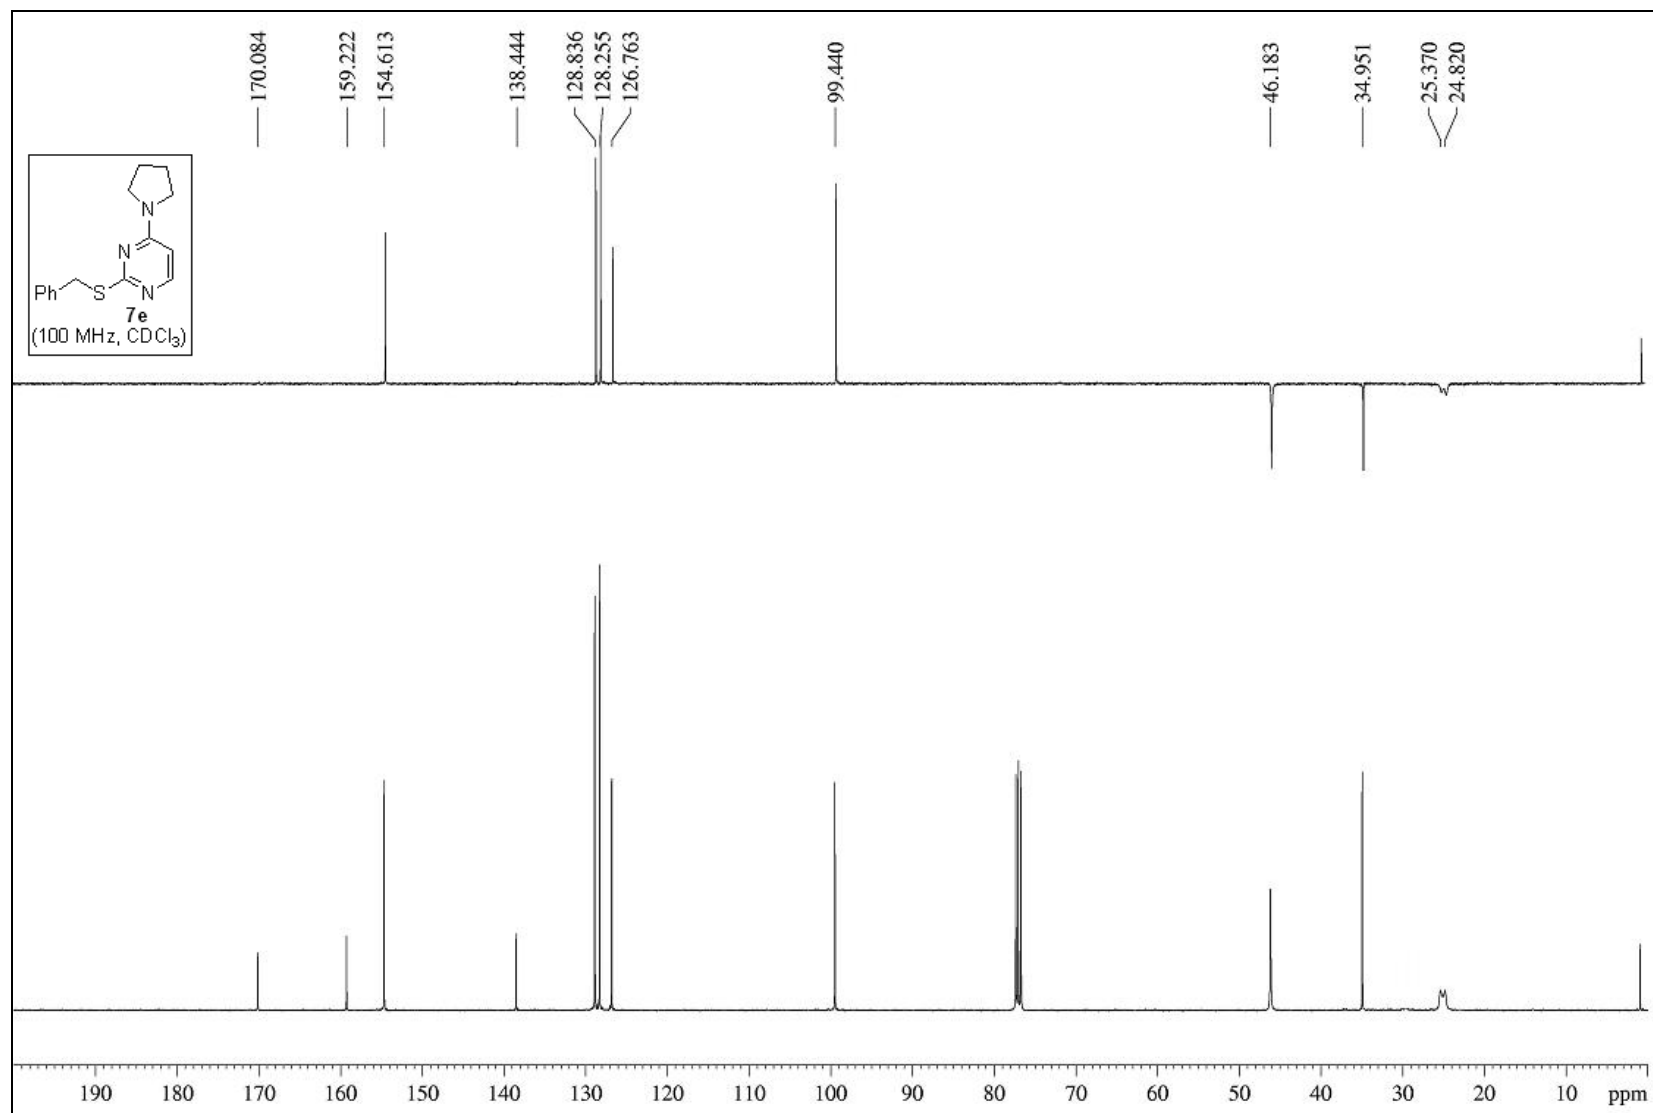

<sup>1</sup>H-NMR of compound 8

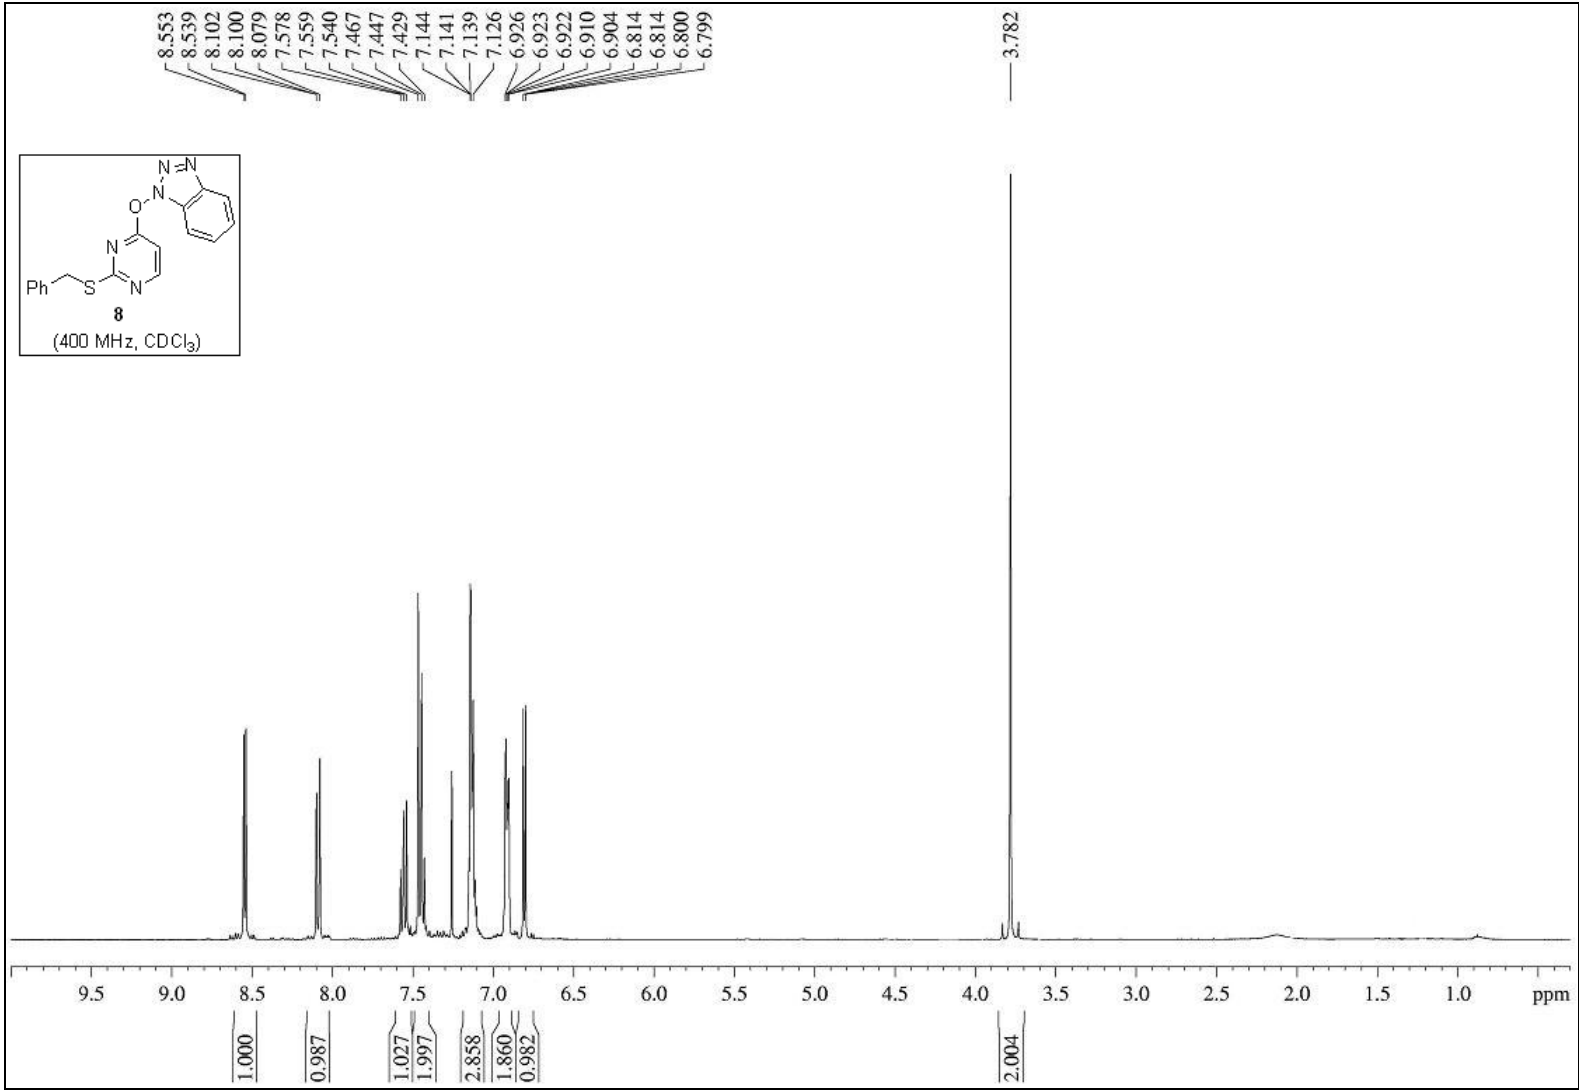

<sup>13</sup>C-NMR and DEPT experiment of compound 8

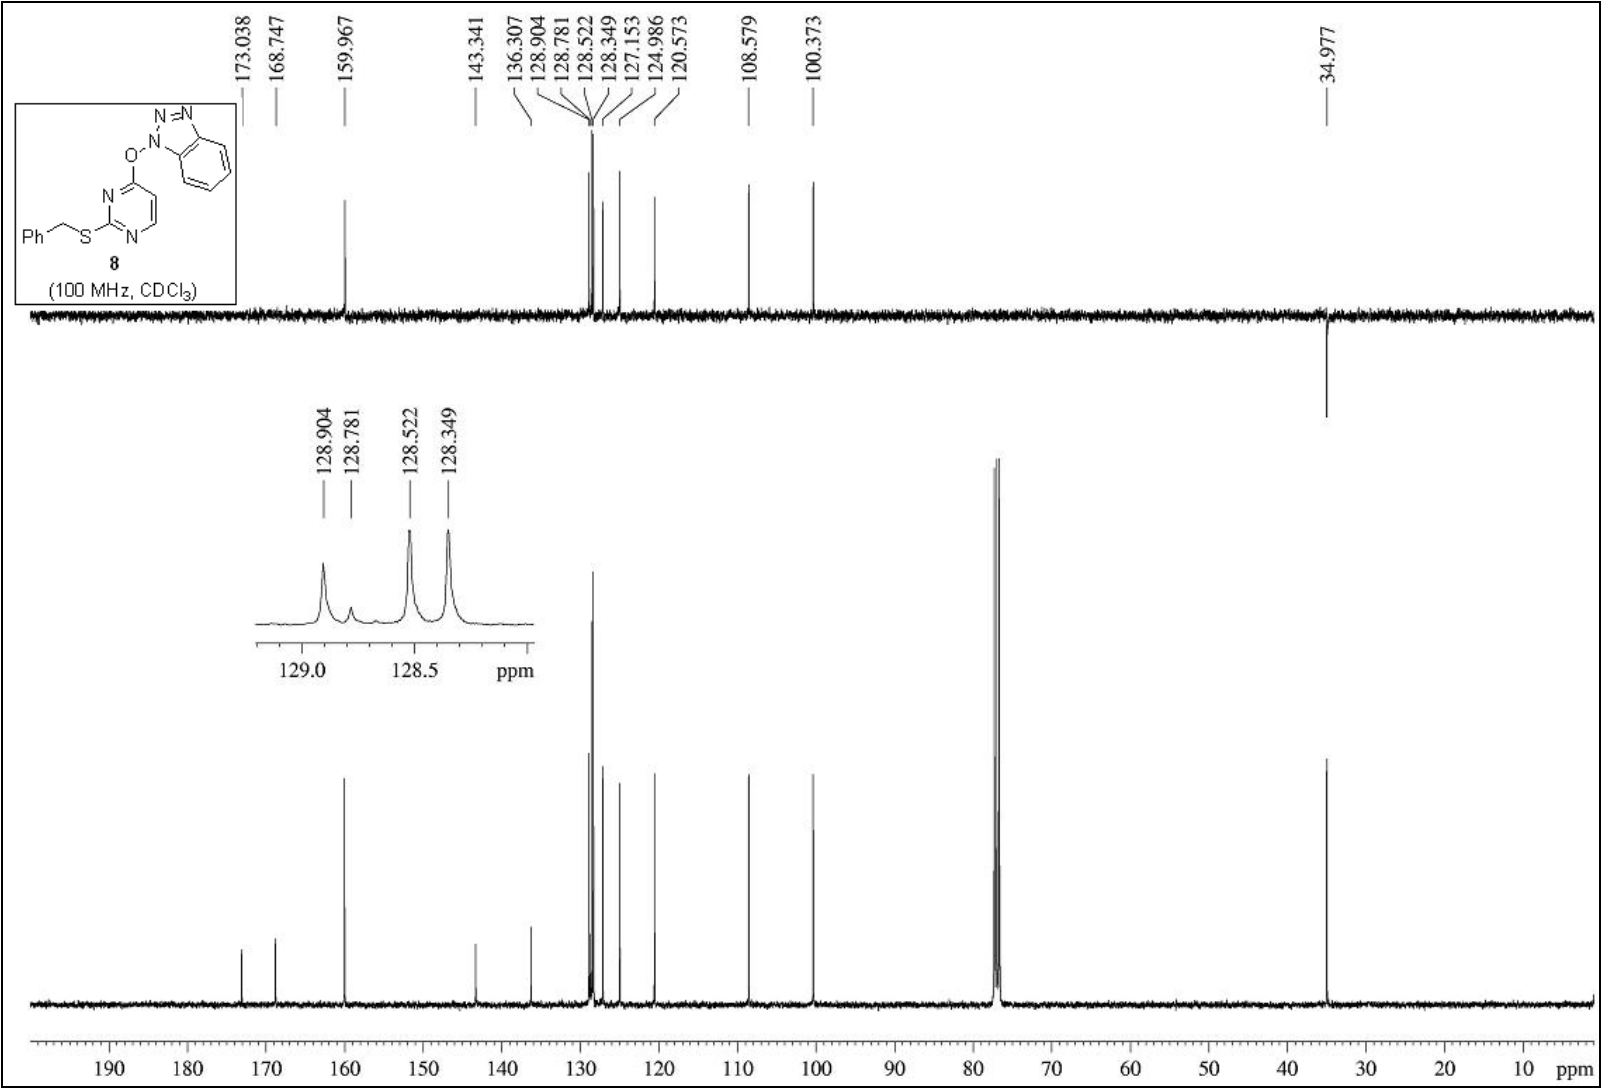

# <sup>1</sup>H-NMR of compound 10

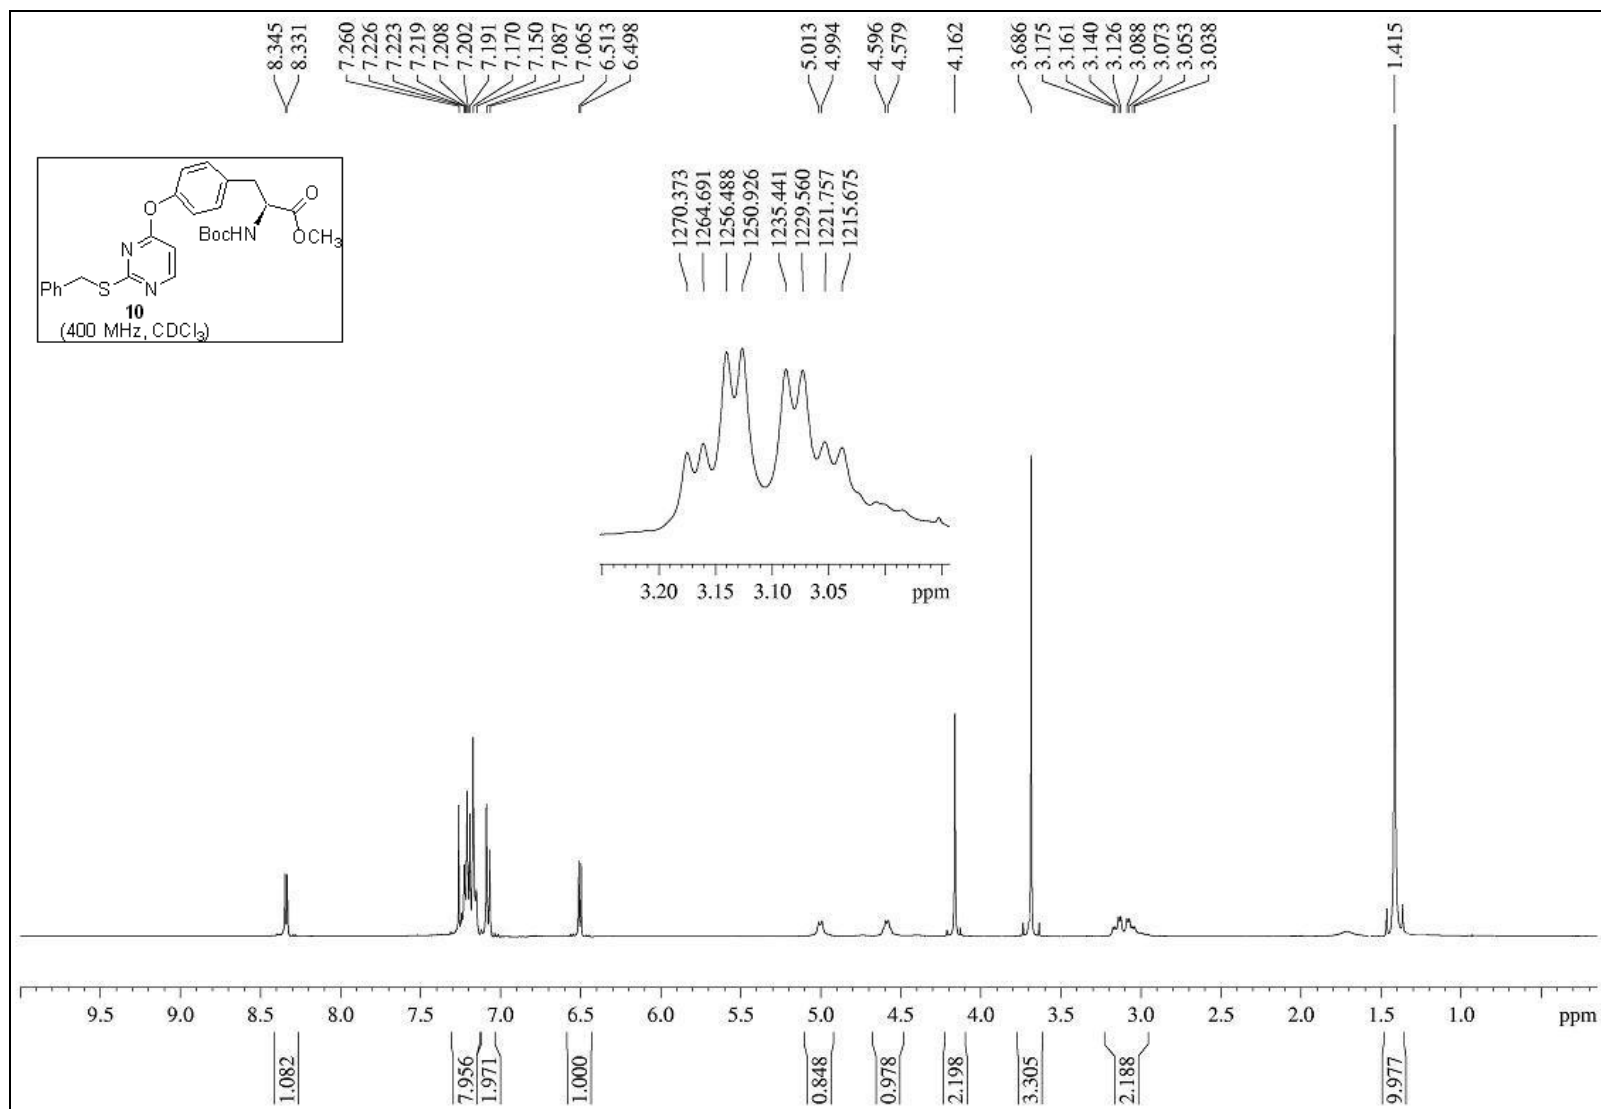

**$^{13}\text{C}$ -NMR and DEPT experiment of compound 10**

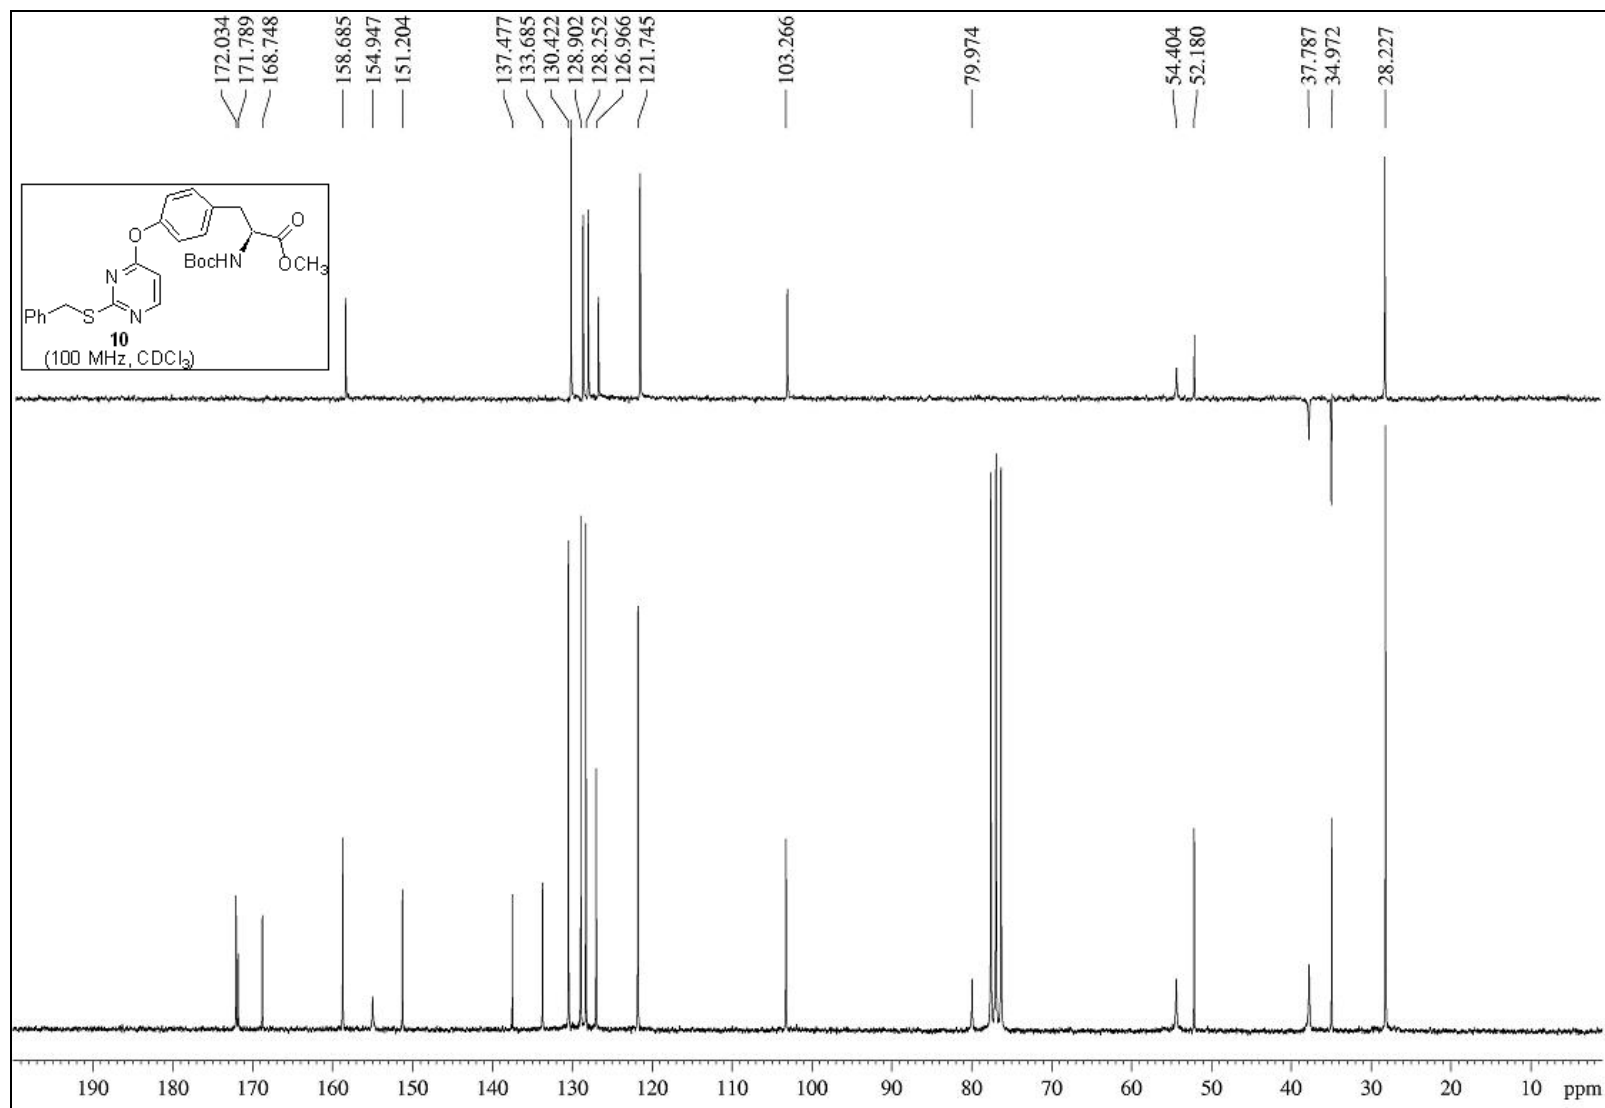

**<sup>1</sup>H-NMR of compound 11**

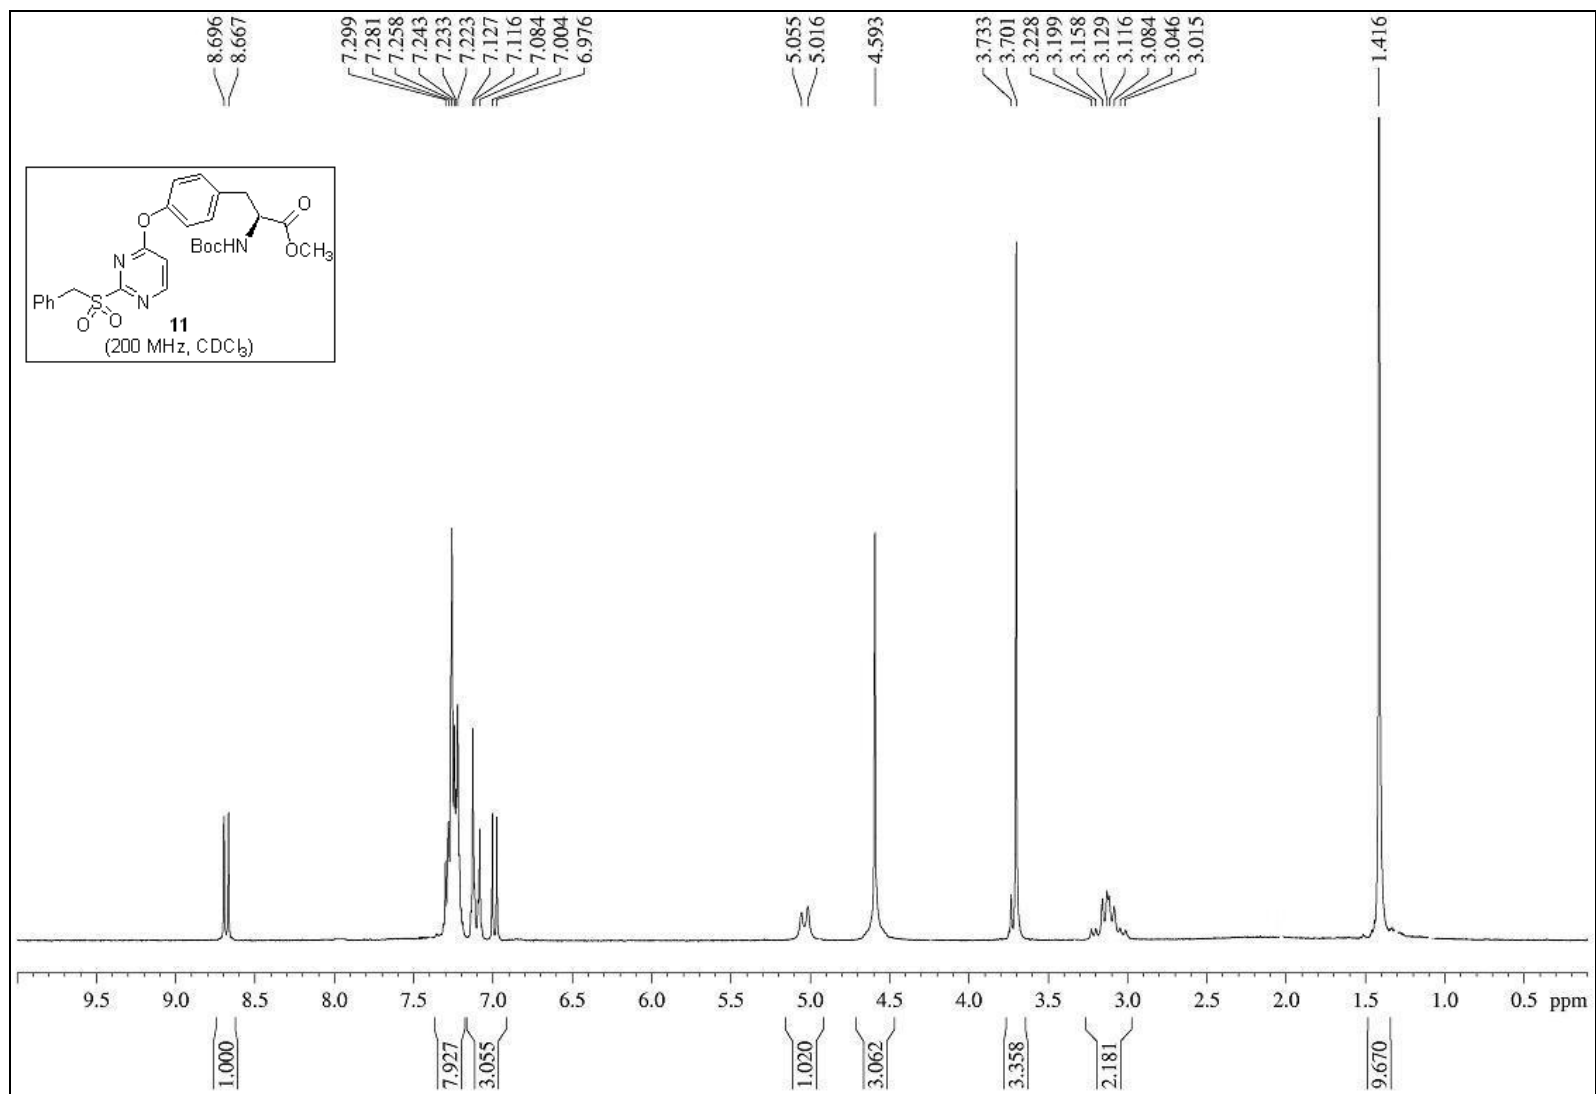

**$^{13}\text{C}$ -NMR and DEPT experiment of compound 11**

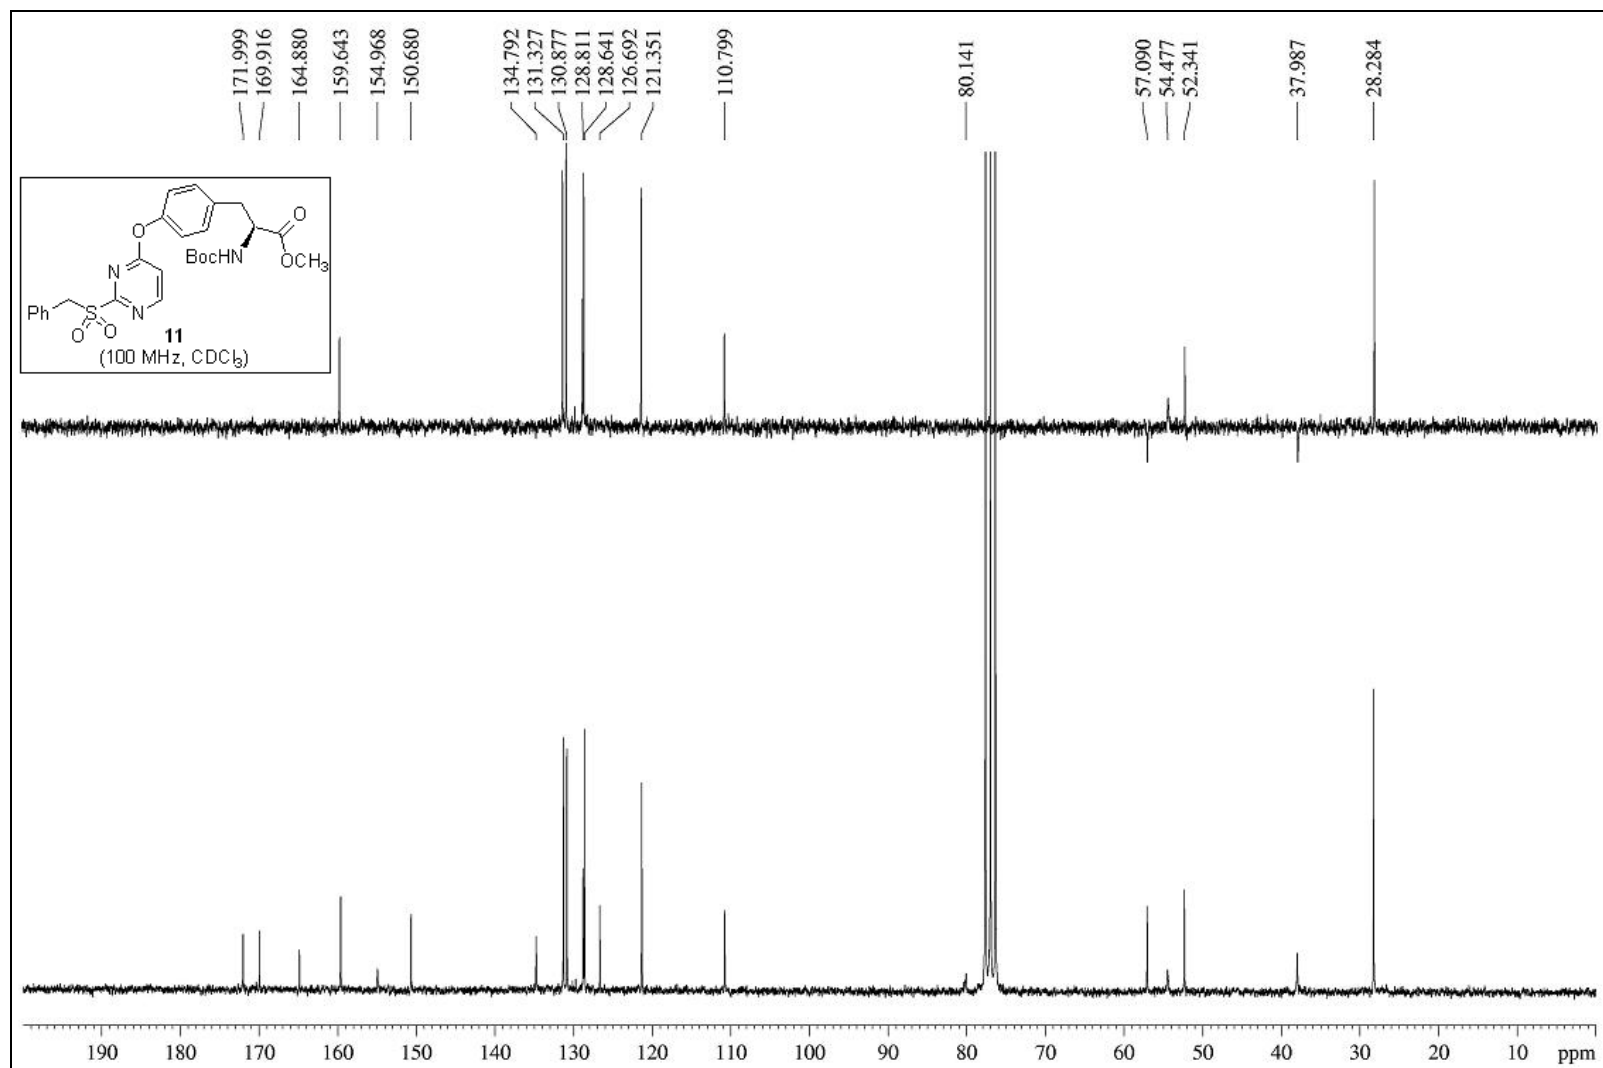

<sup>1</sup>H-NMR of compound 16aa

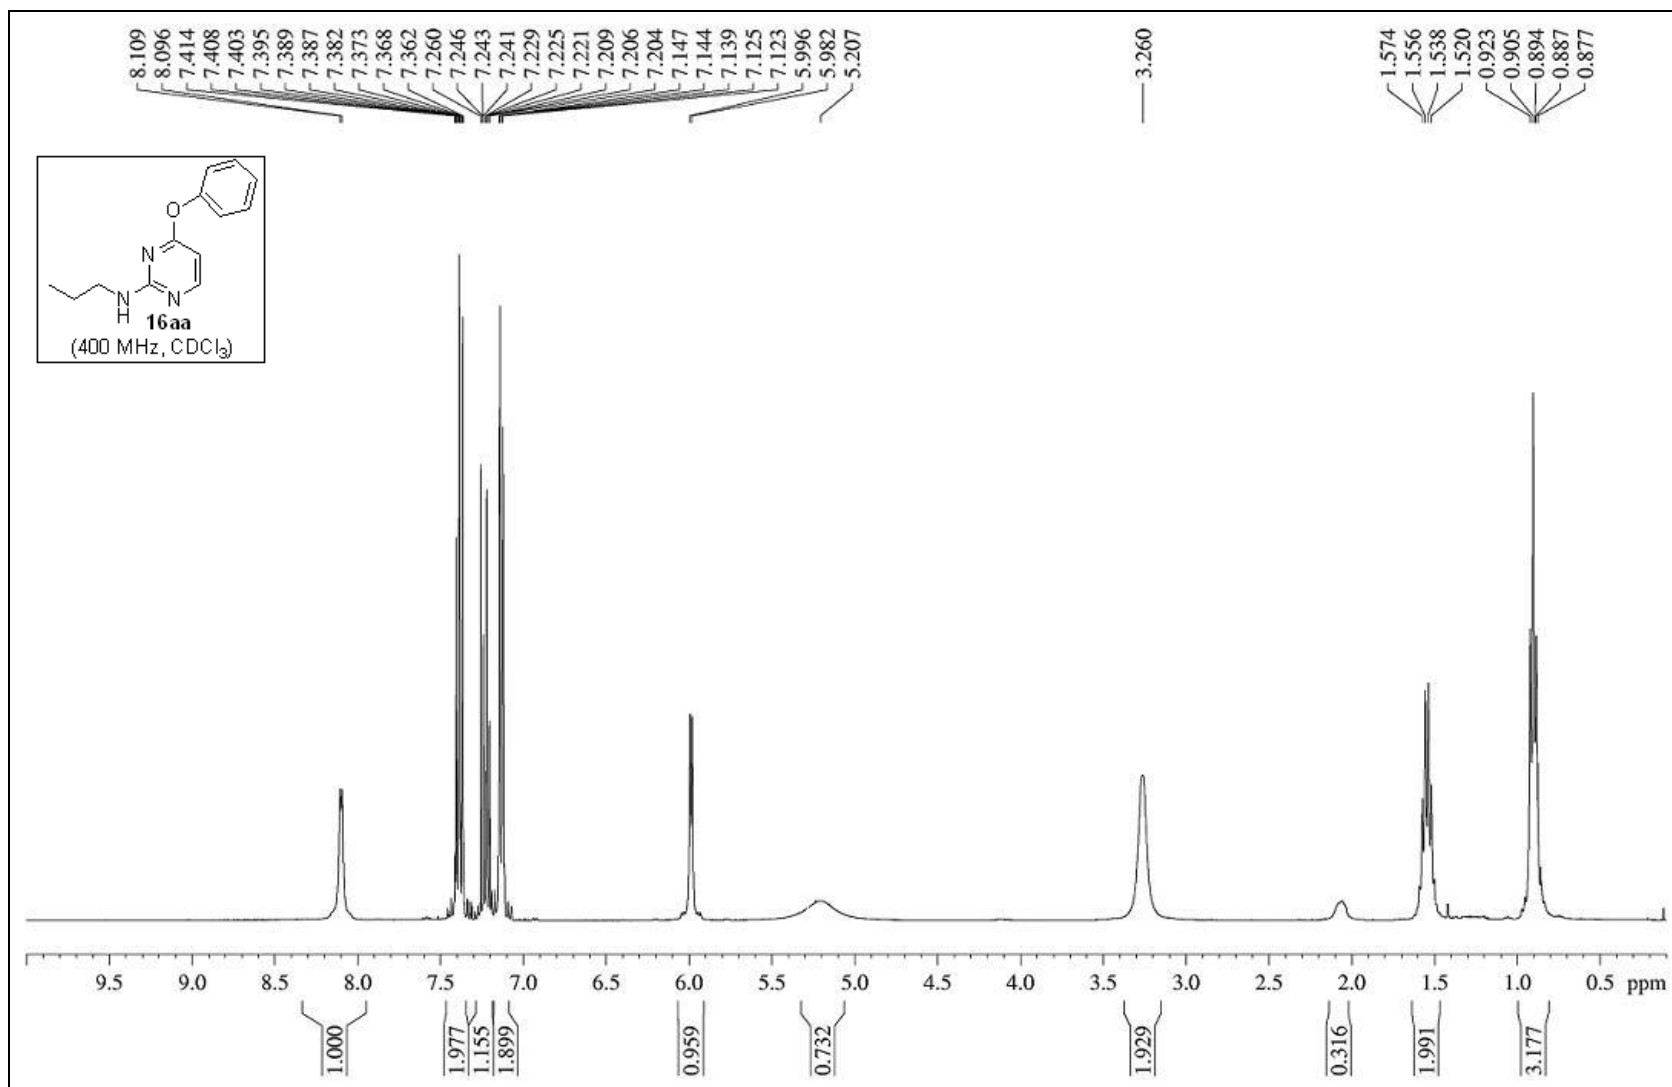

<sup>13</sup>C-NMR and DEPT experiment of compound **16aa**

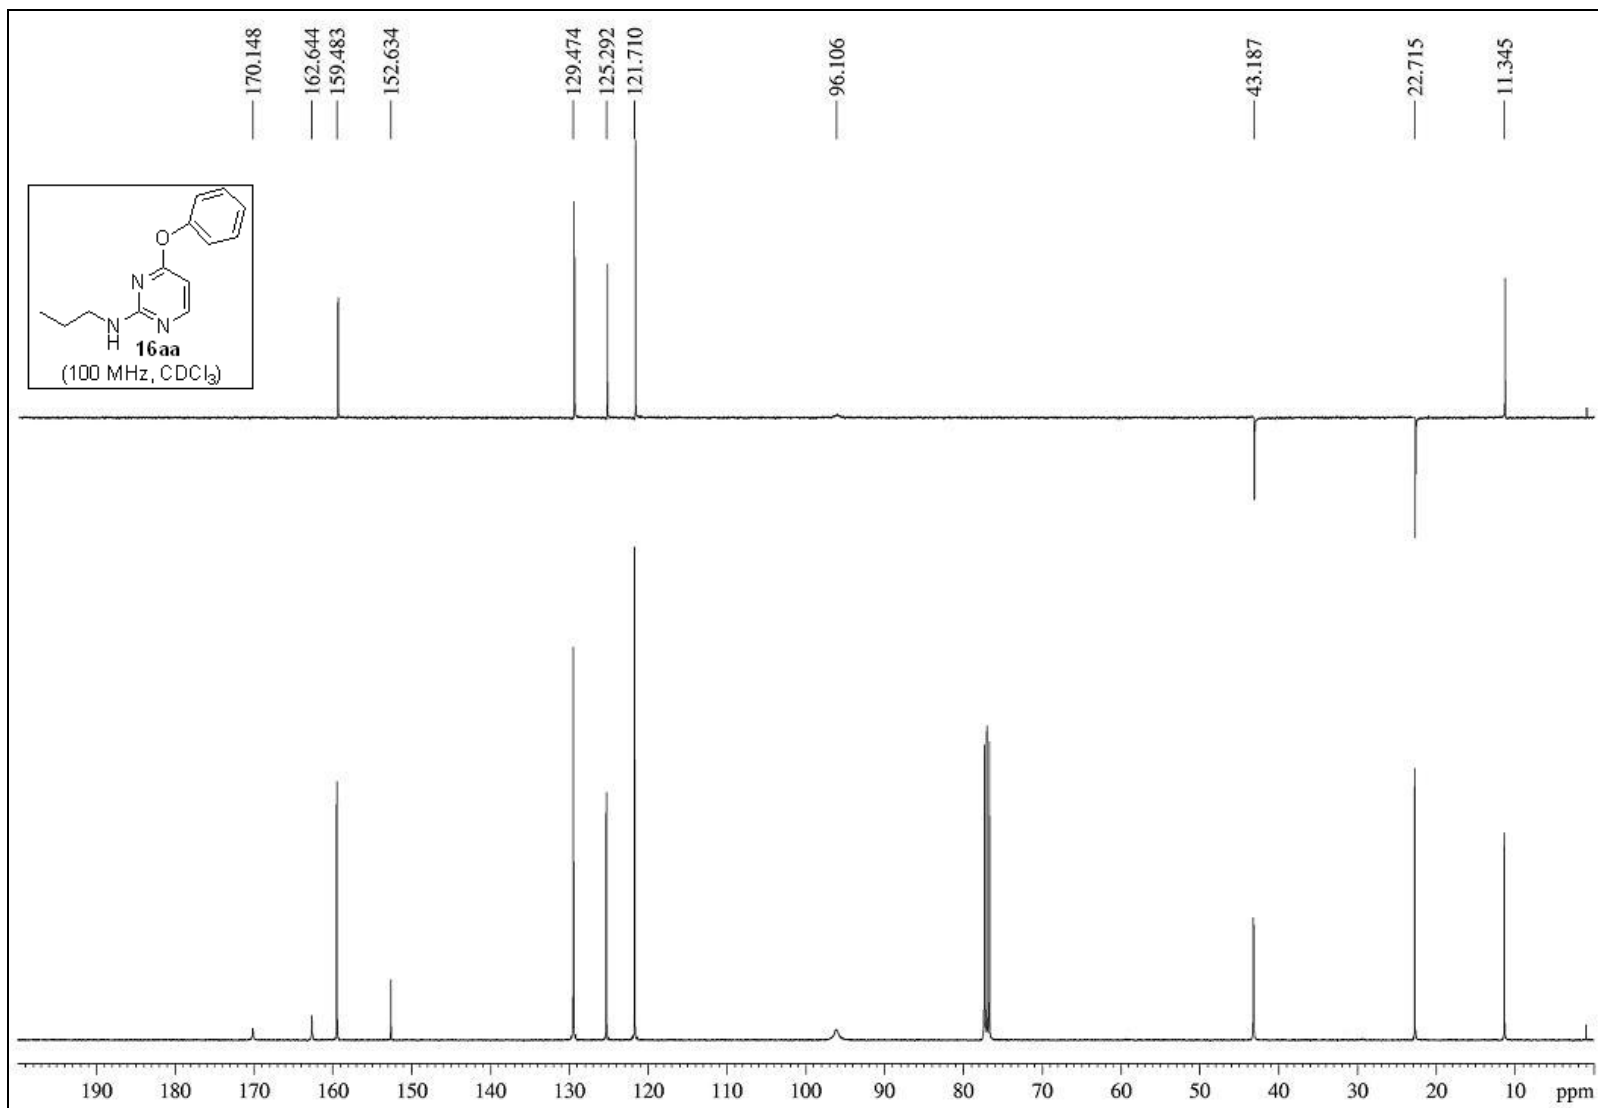

<sup>1</sup>H-NMR of compound 16ab

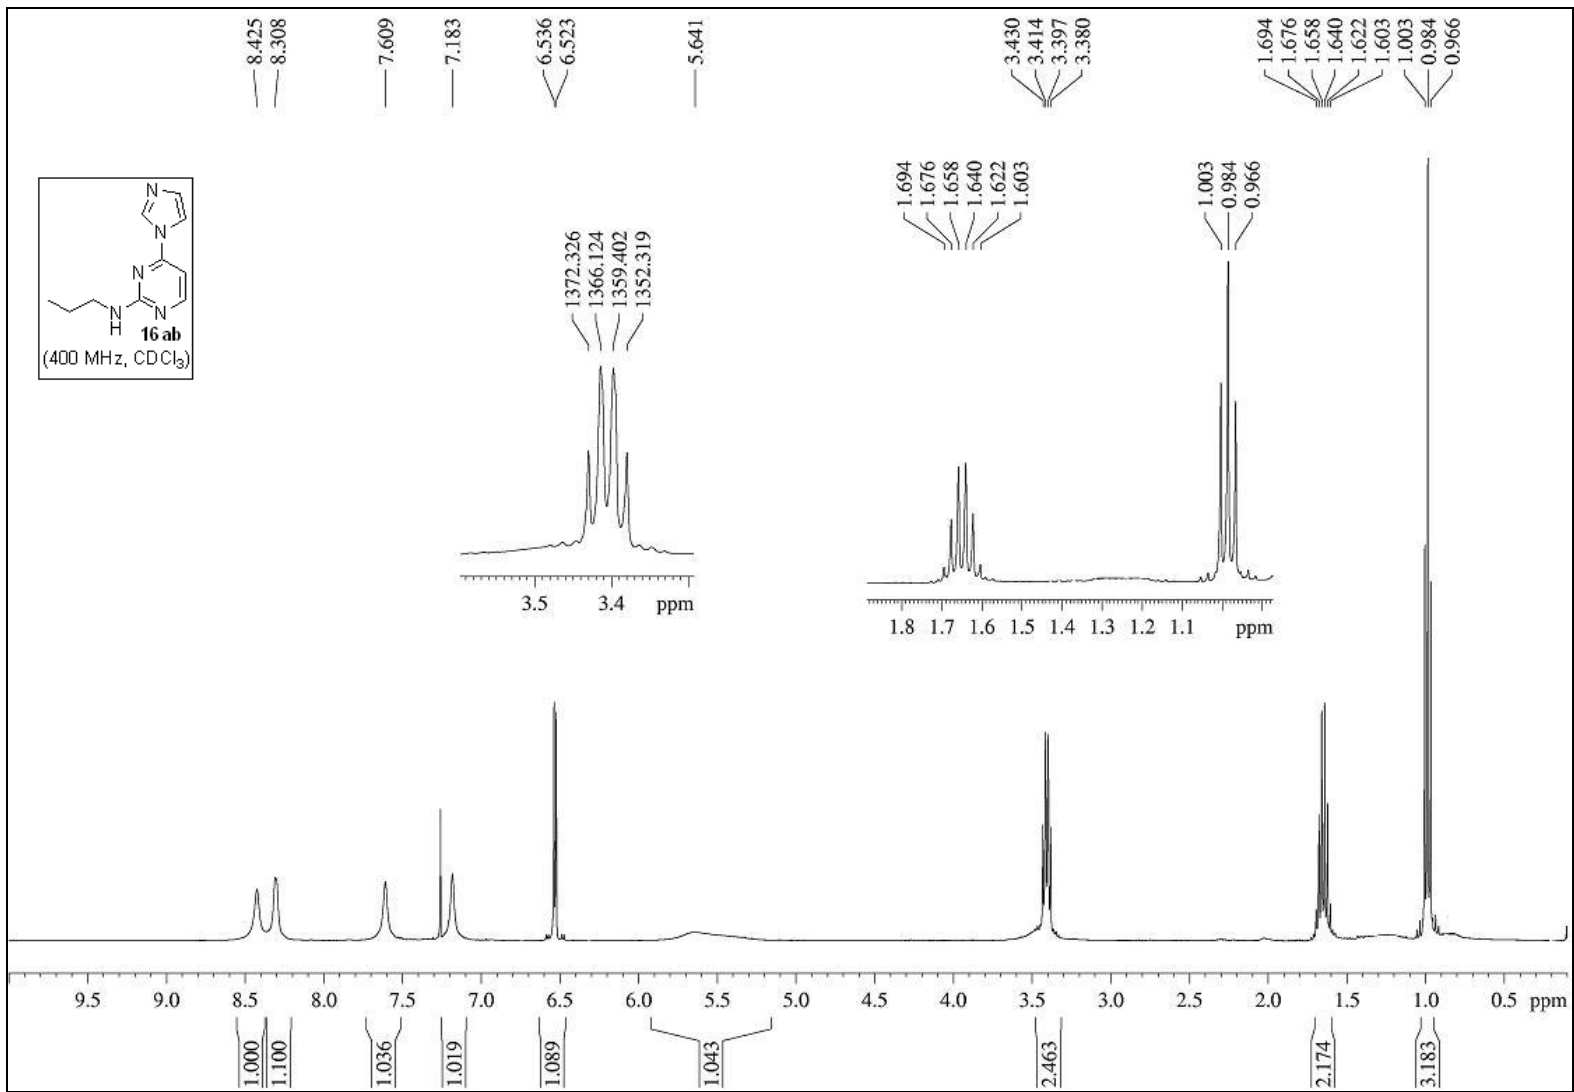

**$^{13}\text{C}$ -NMR and DEPT experiment of compound 16ab**

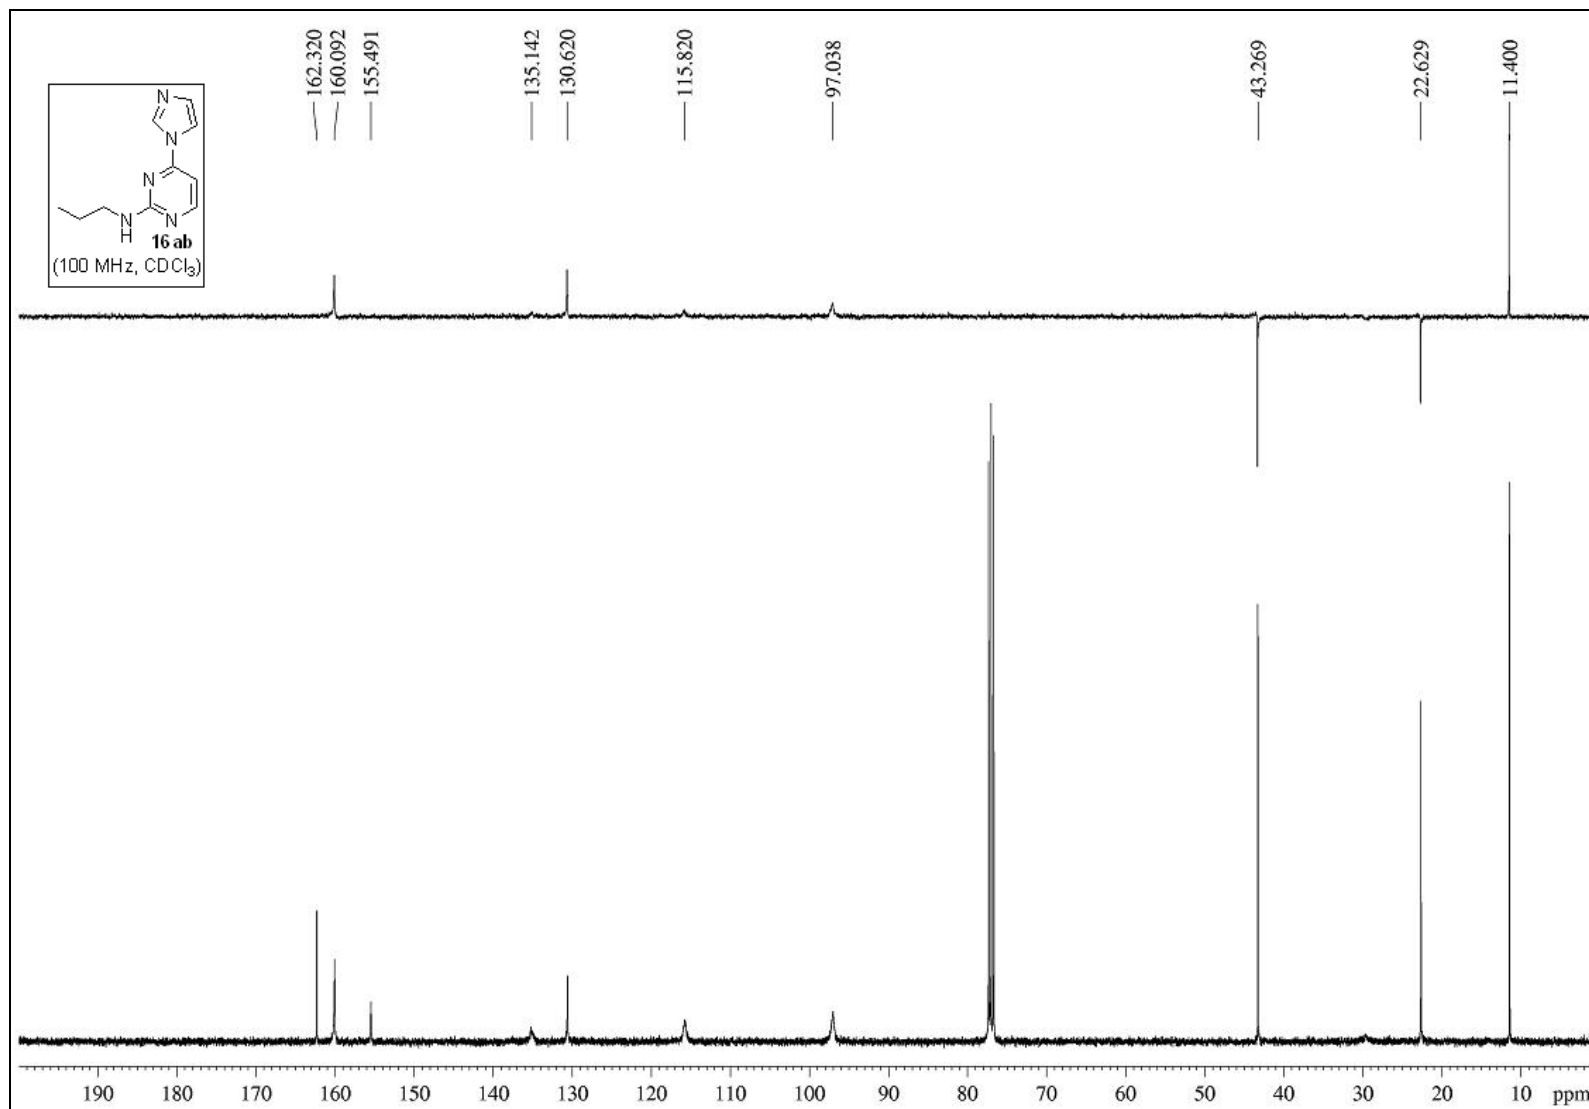

<sup>1</sup>H-NMR of compound 16ac

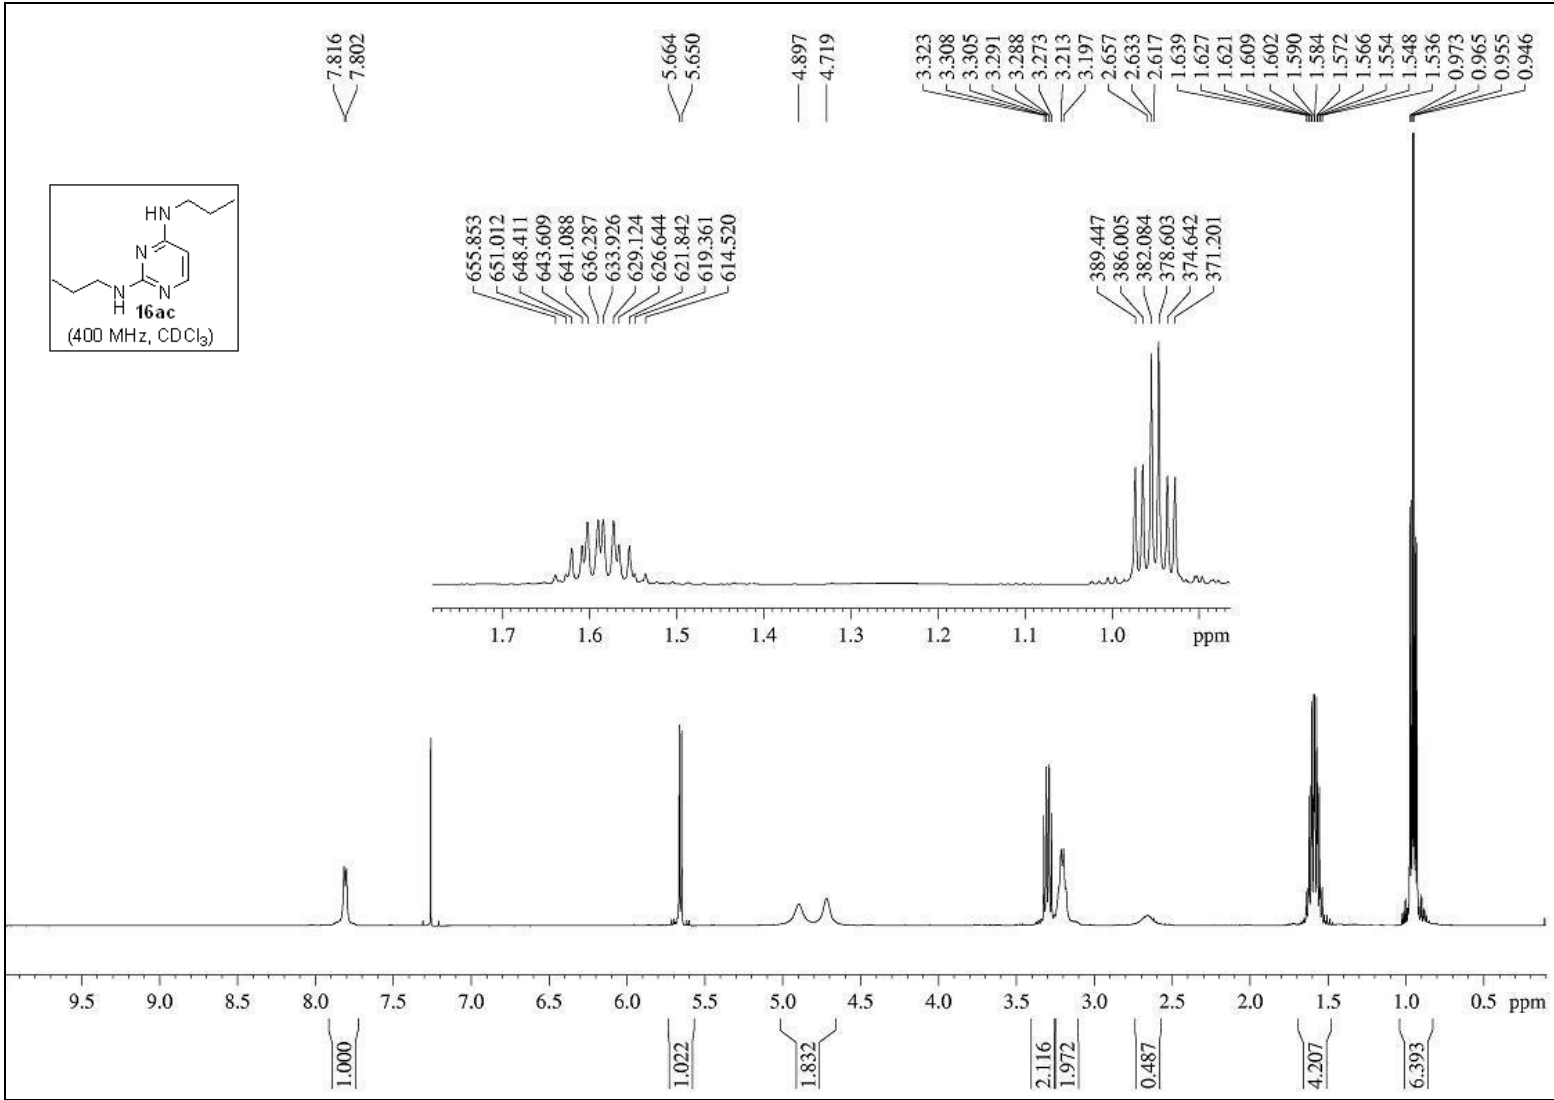

<sup>13</sup>C-NMR and DEPT experiment of compound 16ac

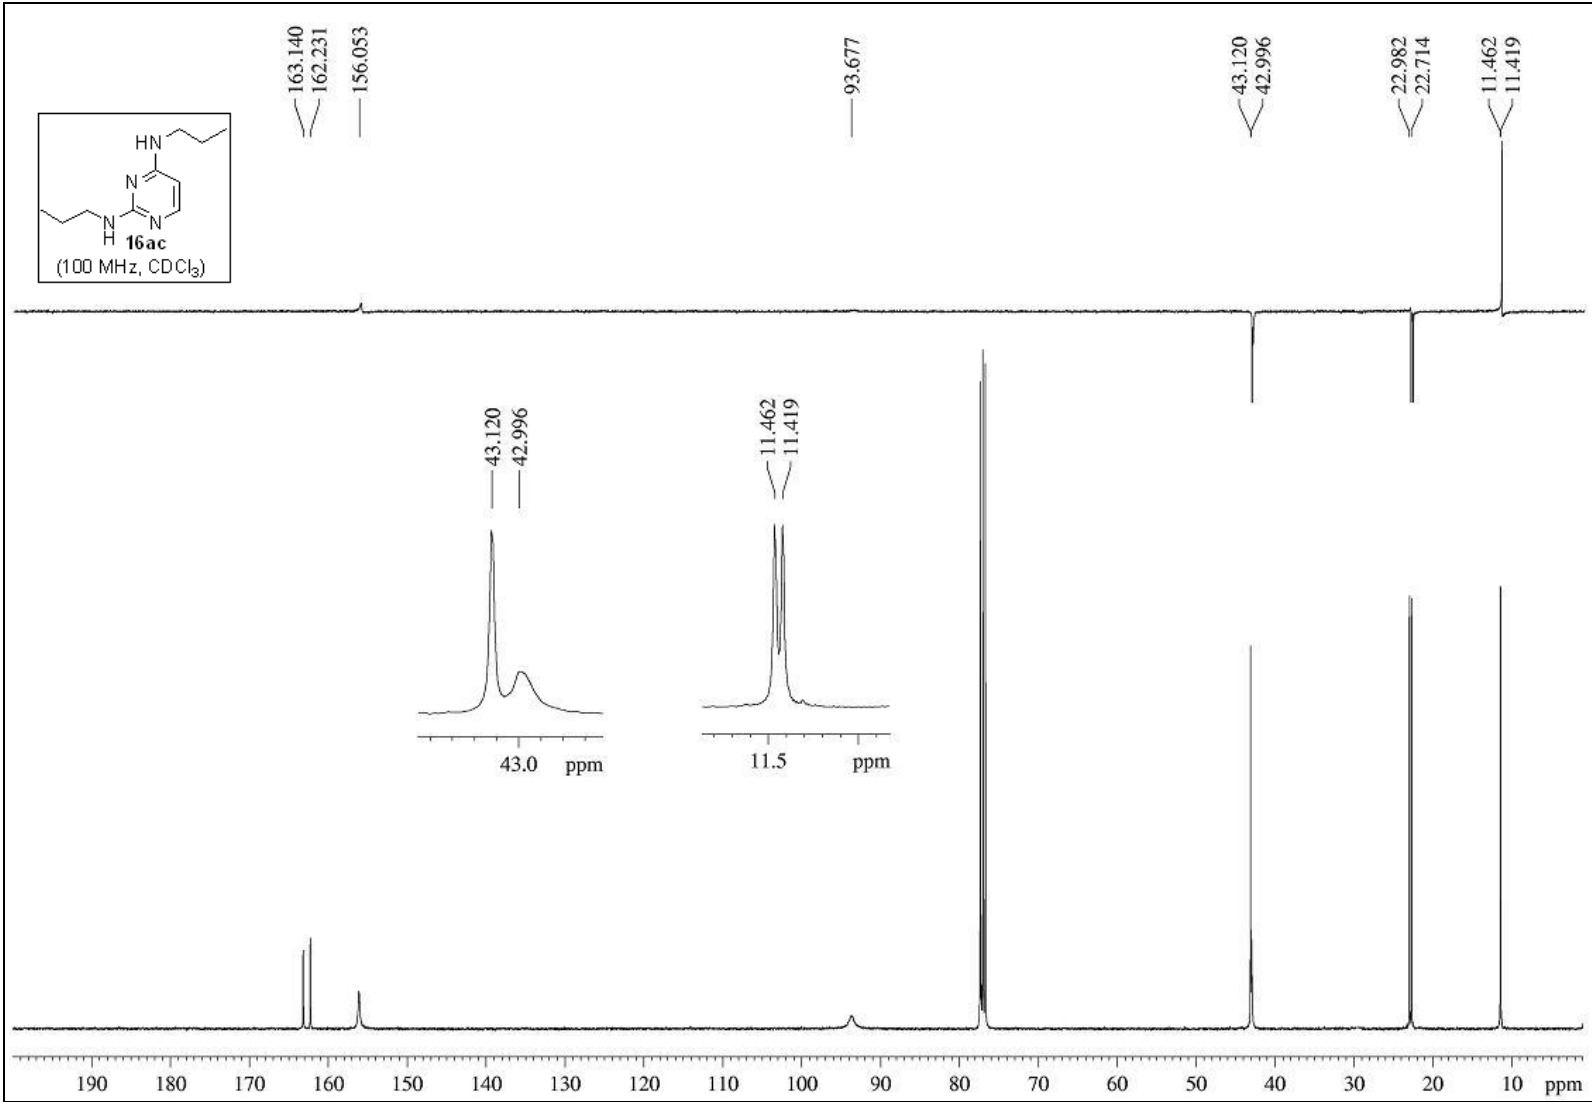

<sup>1</sup>H-NMR of compound 16ae

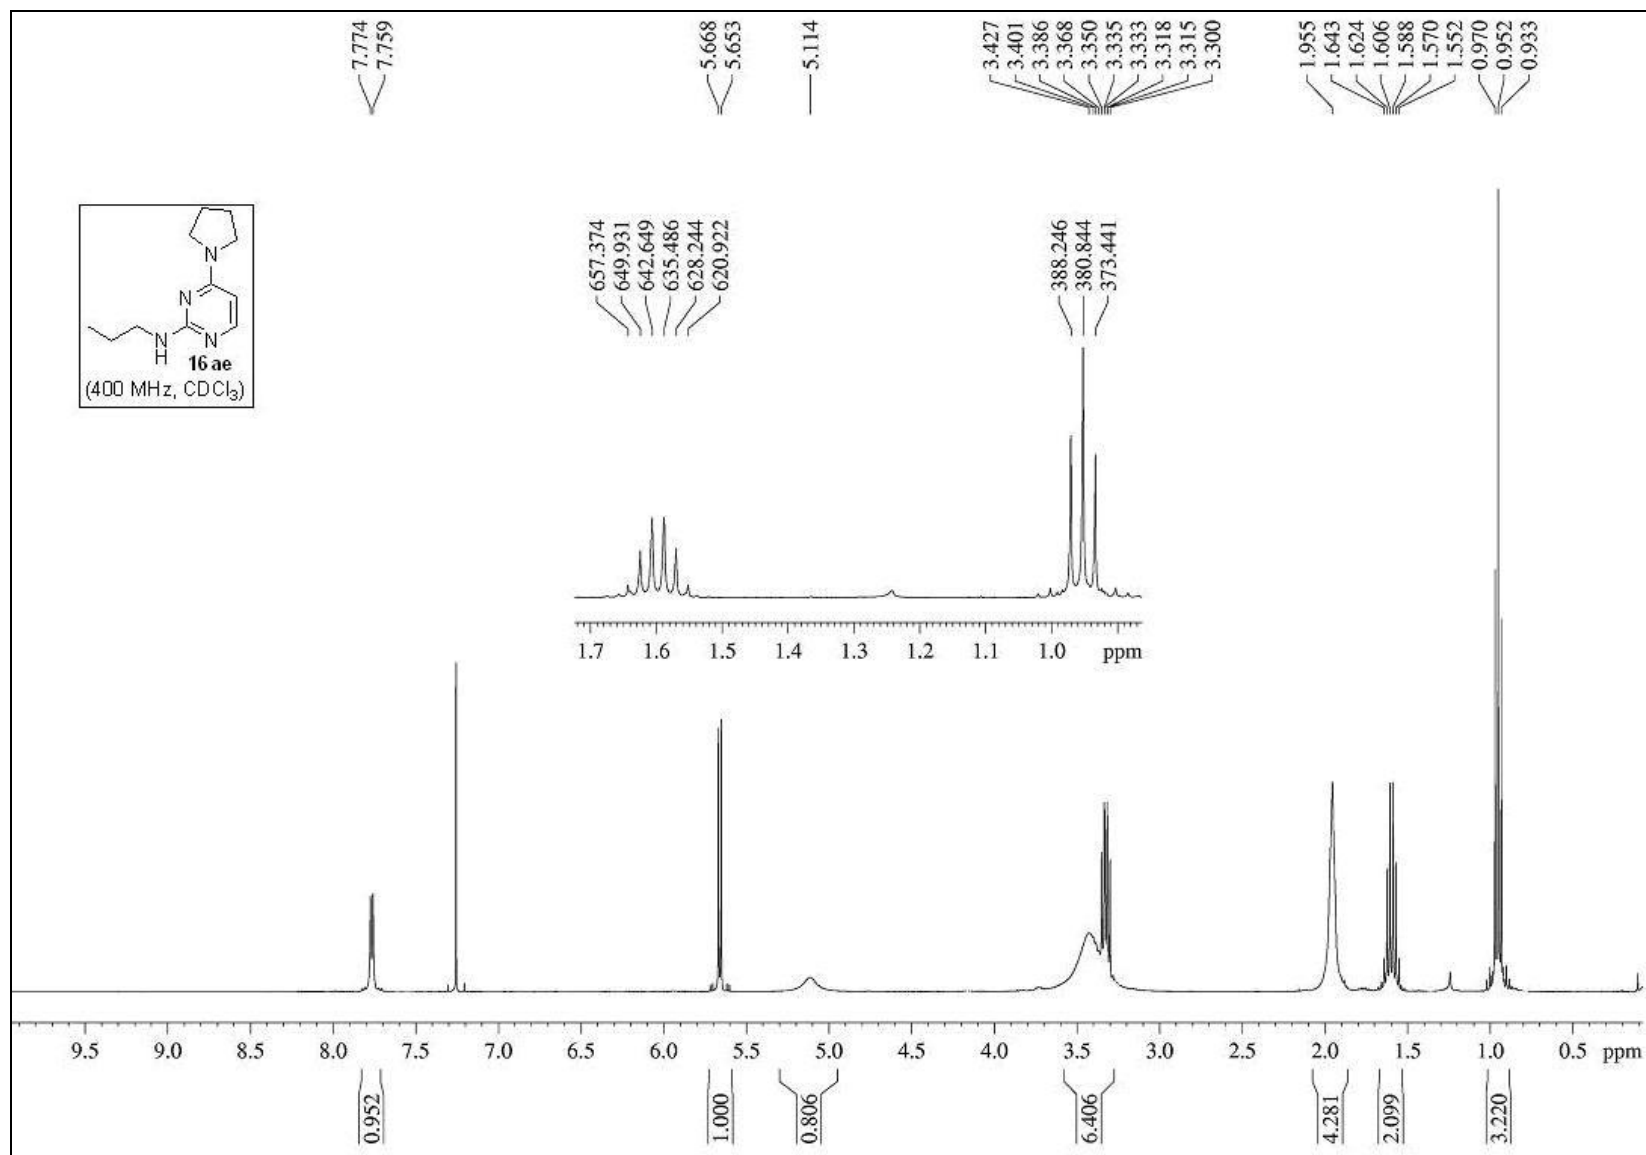

<sup>13</sup>C-NMR and DEPT experiment of compound 16ae

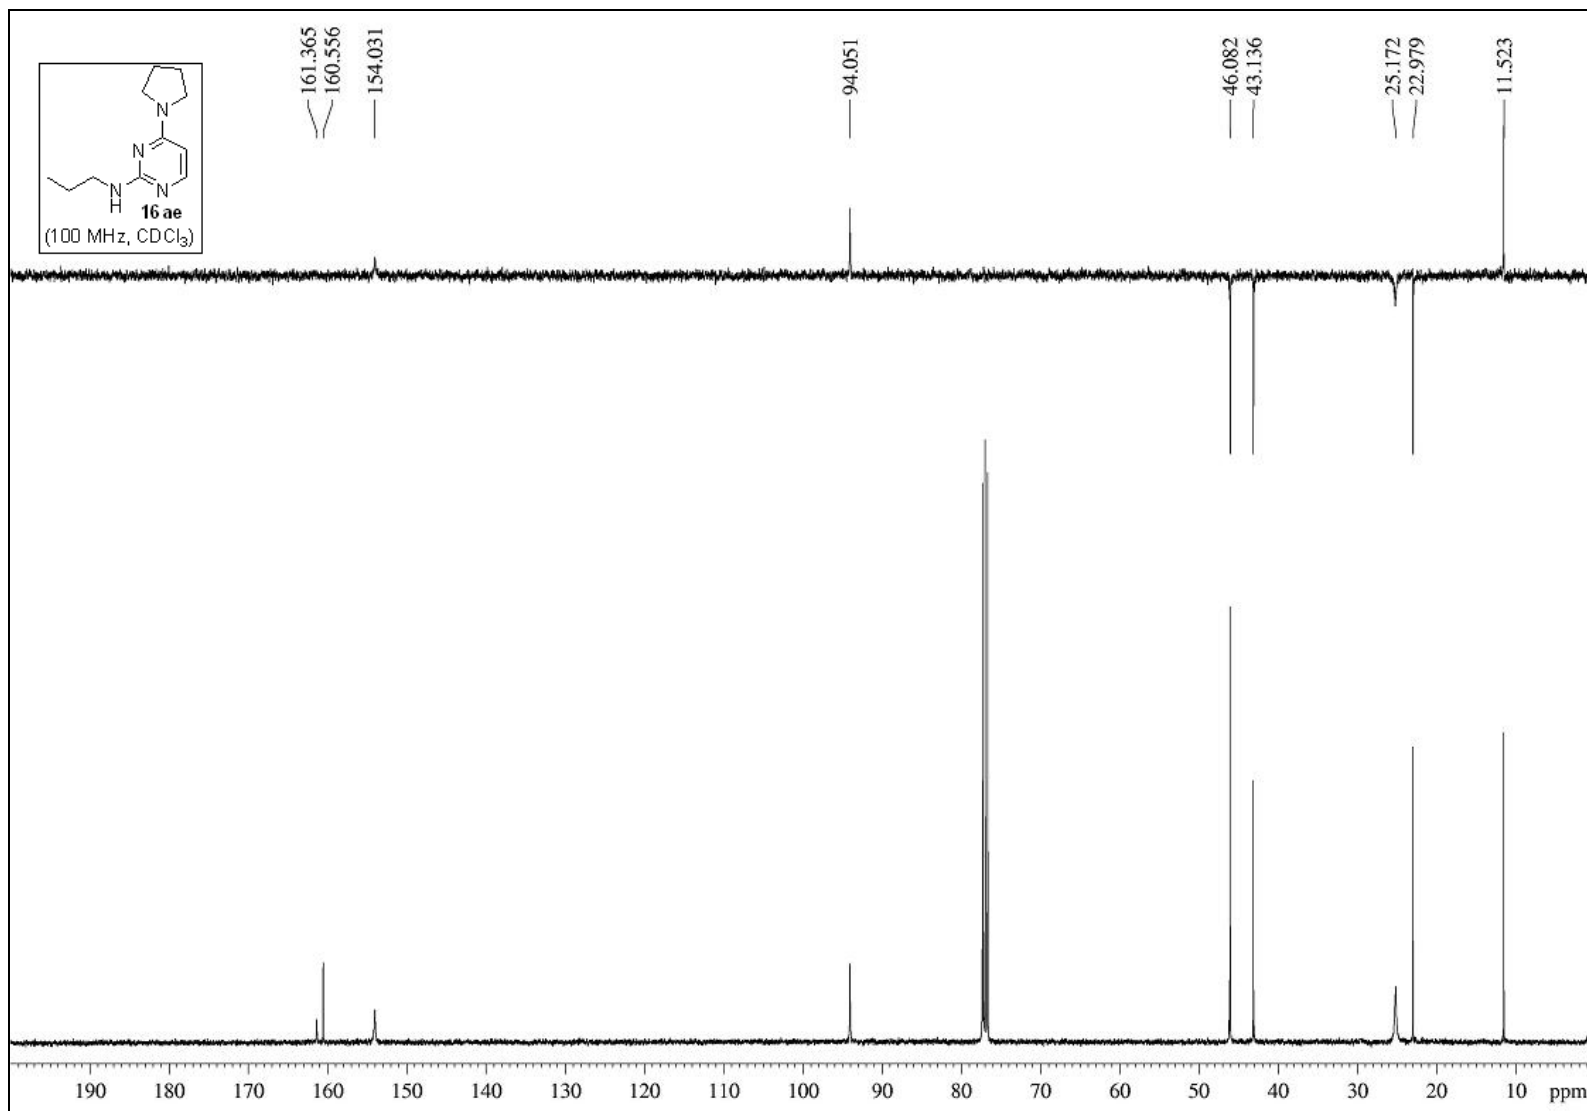

**<sup>1</sup>H-NMR of compound 16ba**

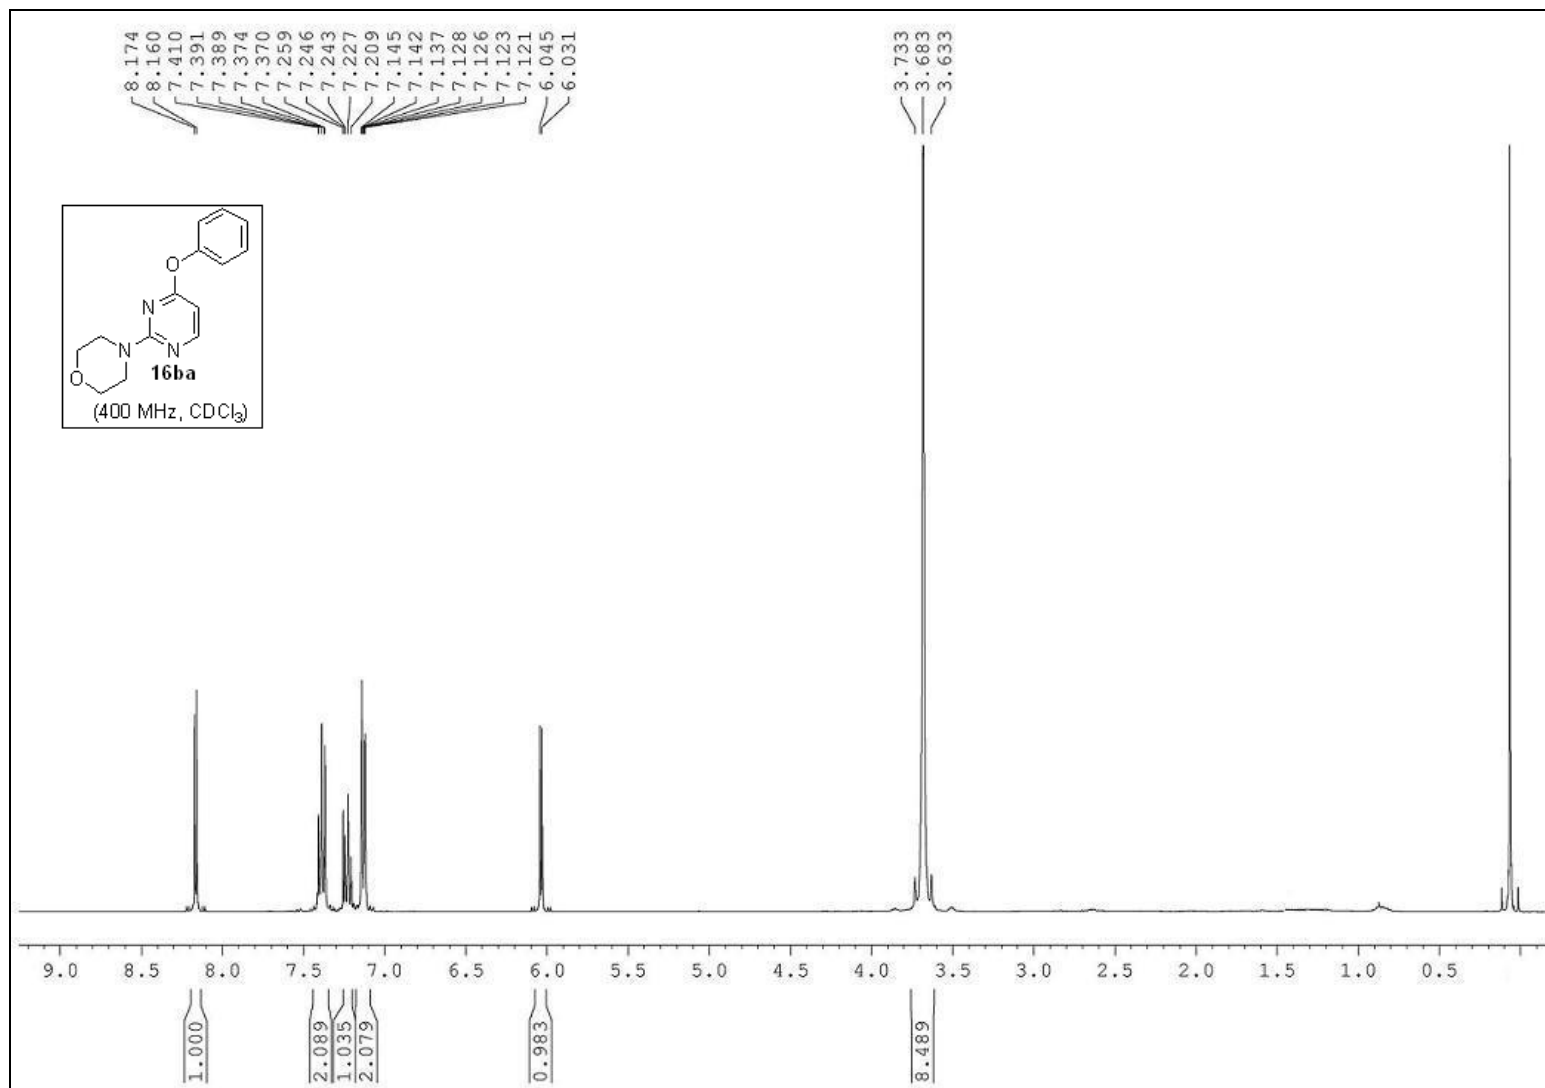

**$^{13}\text{C}$ -NMR and DEPT experiment of compound 16ba**

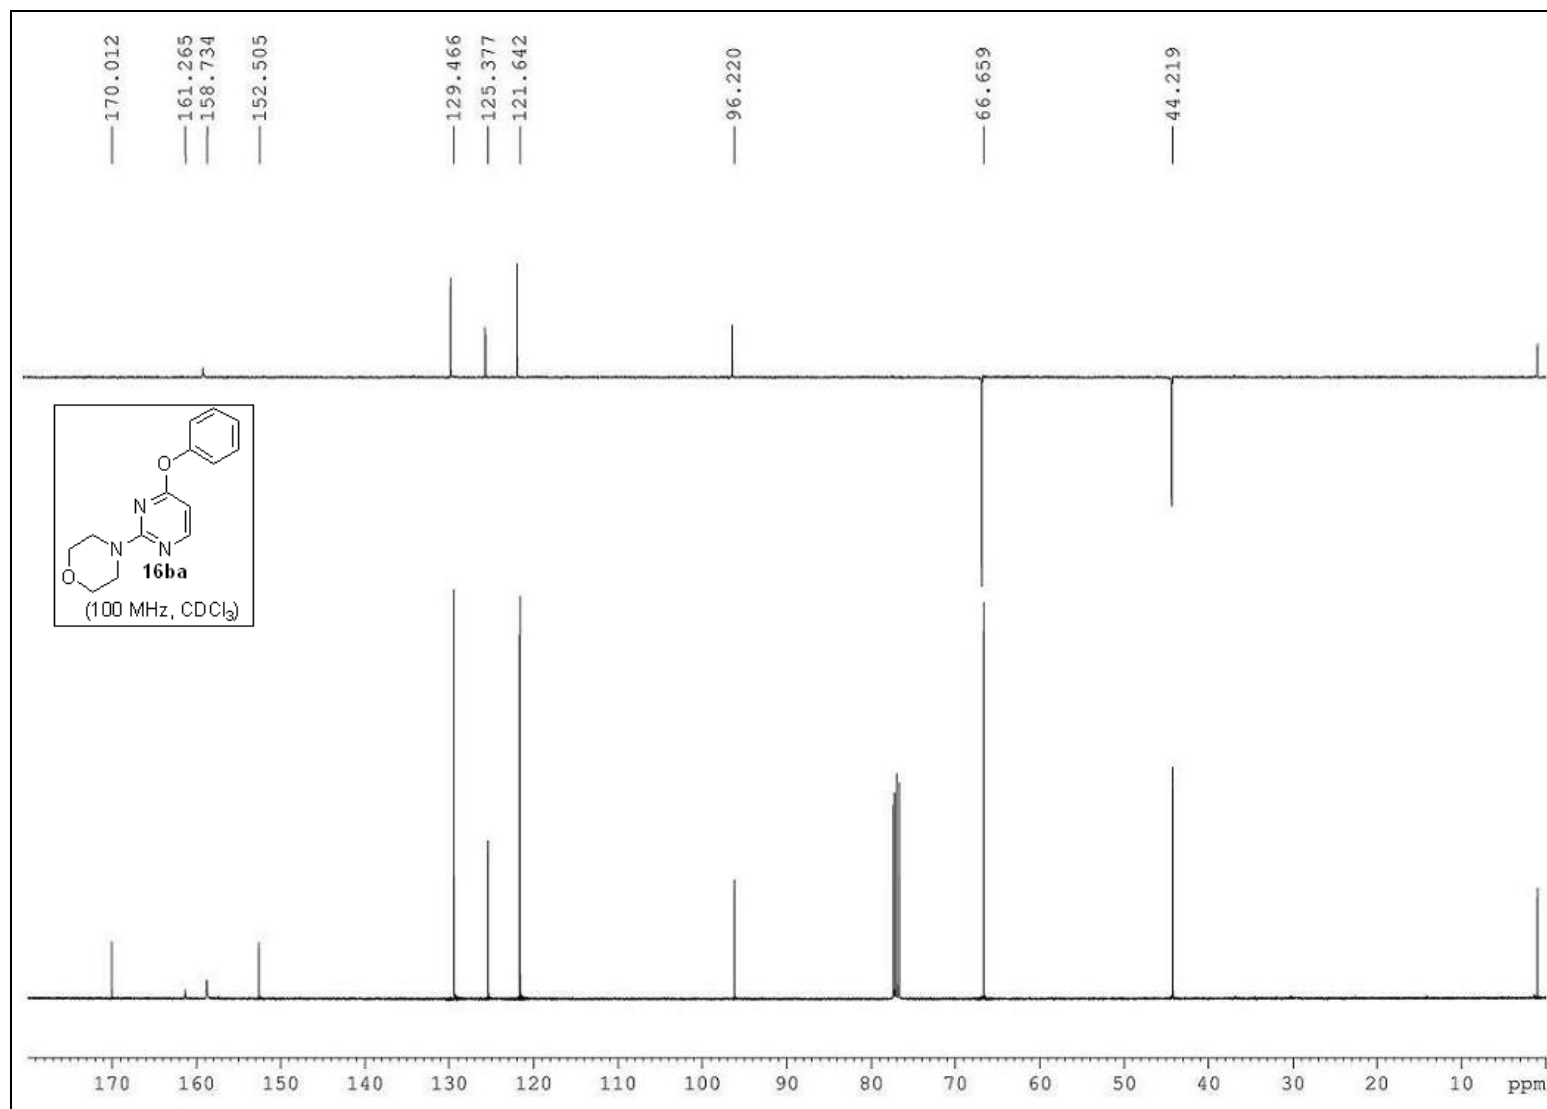

<sup>1</sup>H-NMR of compound 16bb

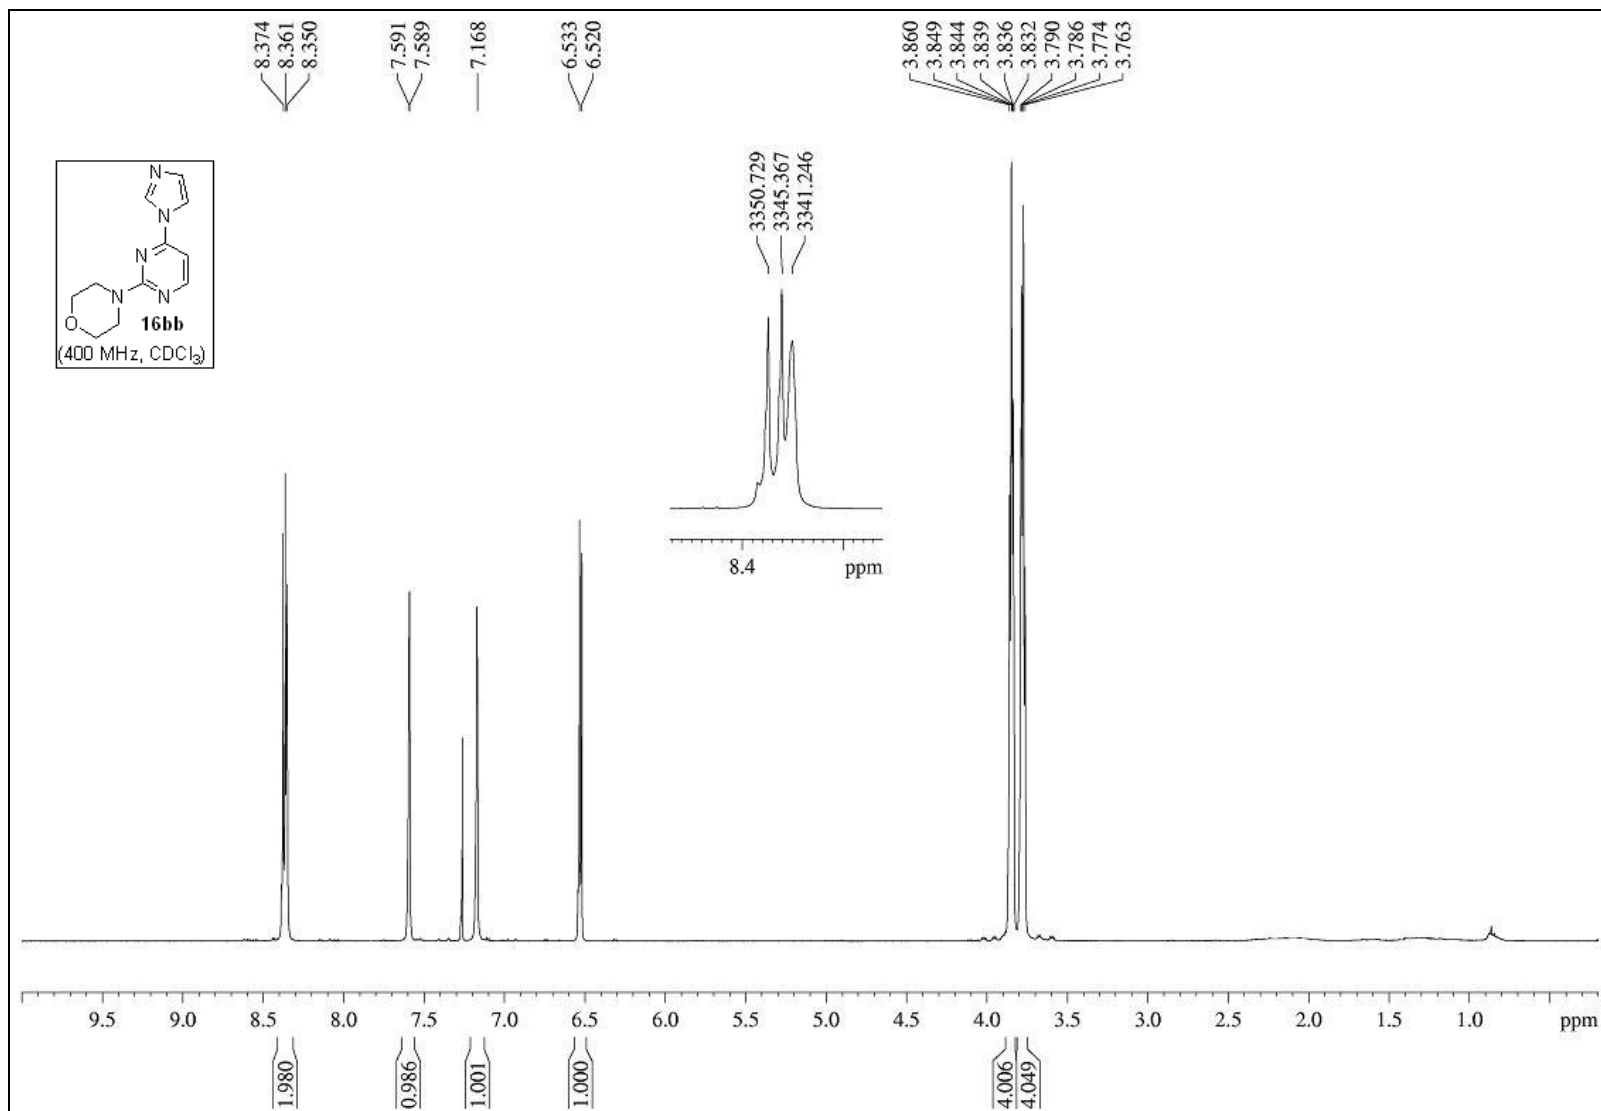

<sup>13</sup>C-NMR and DEPT experiment of compound 16bb

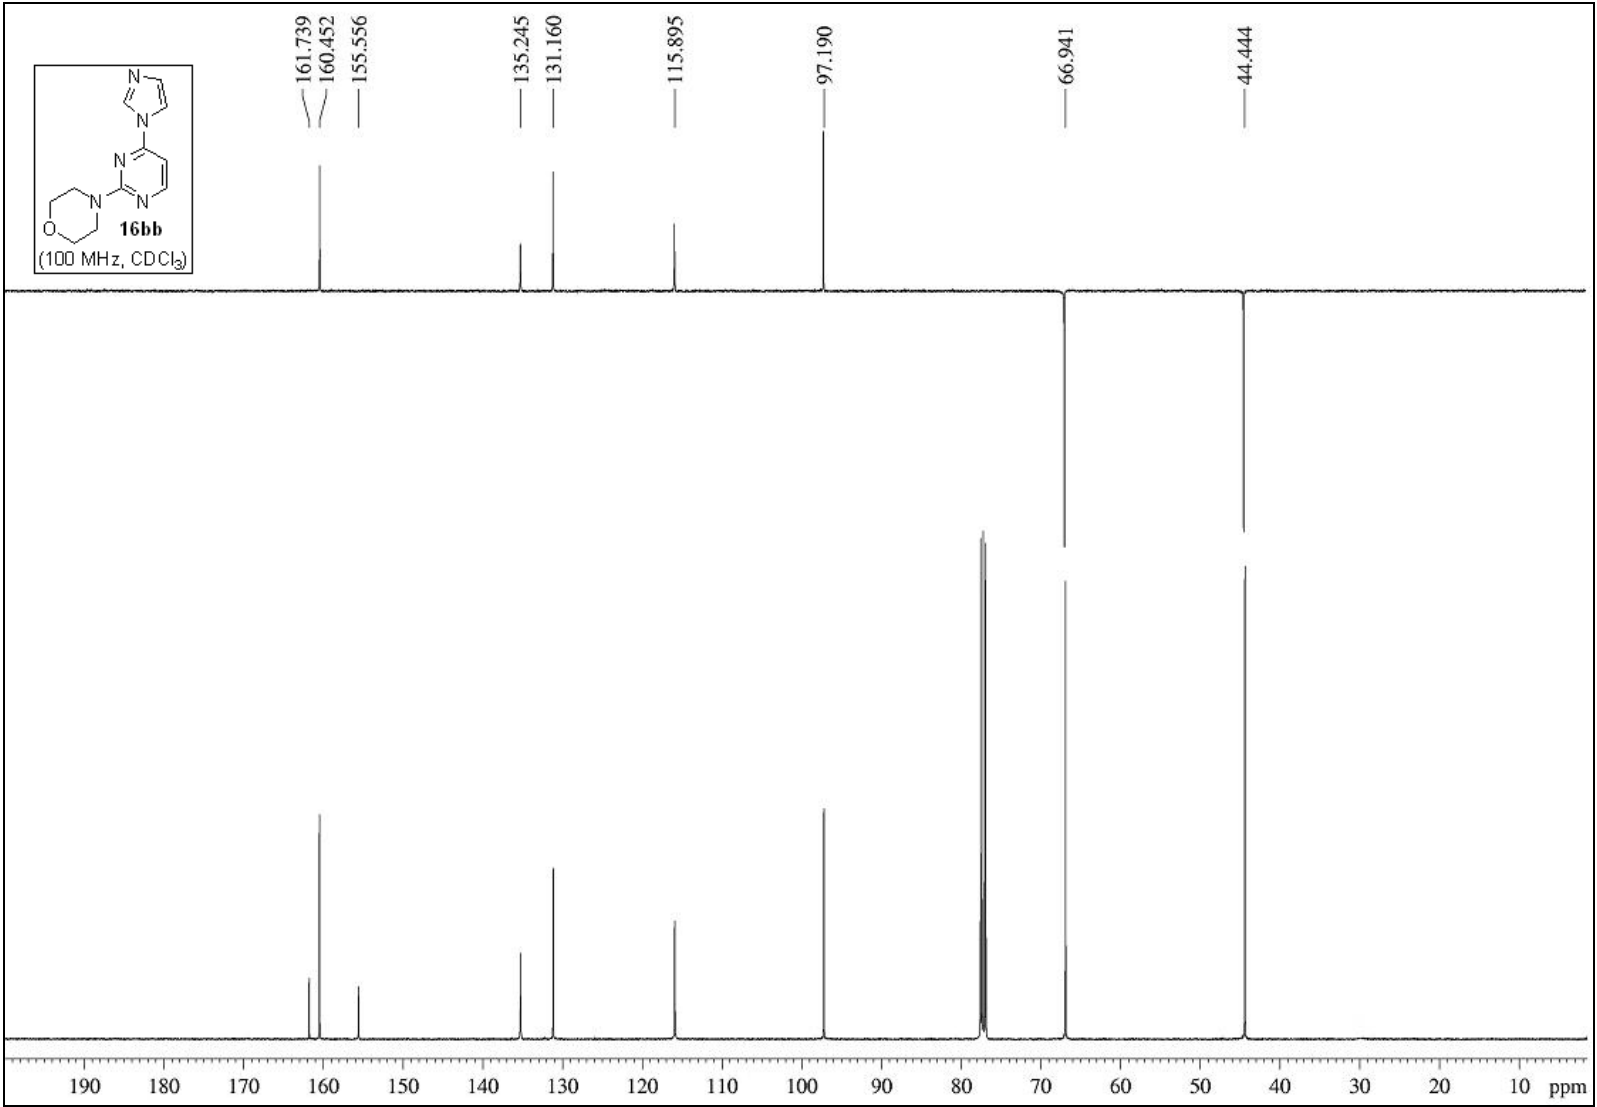

<sup>1</sup>H-NMR of compound **16bc**

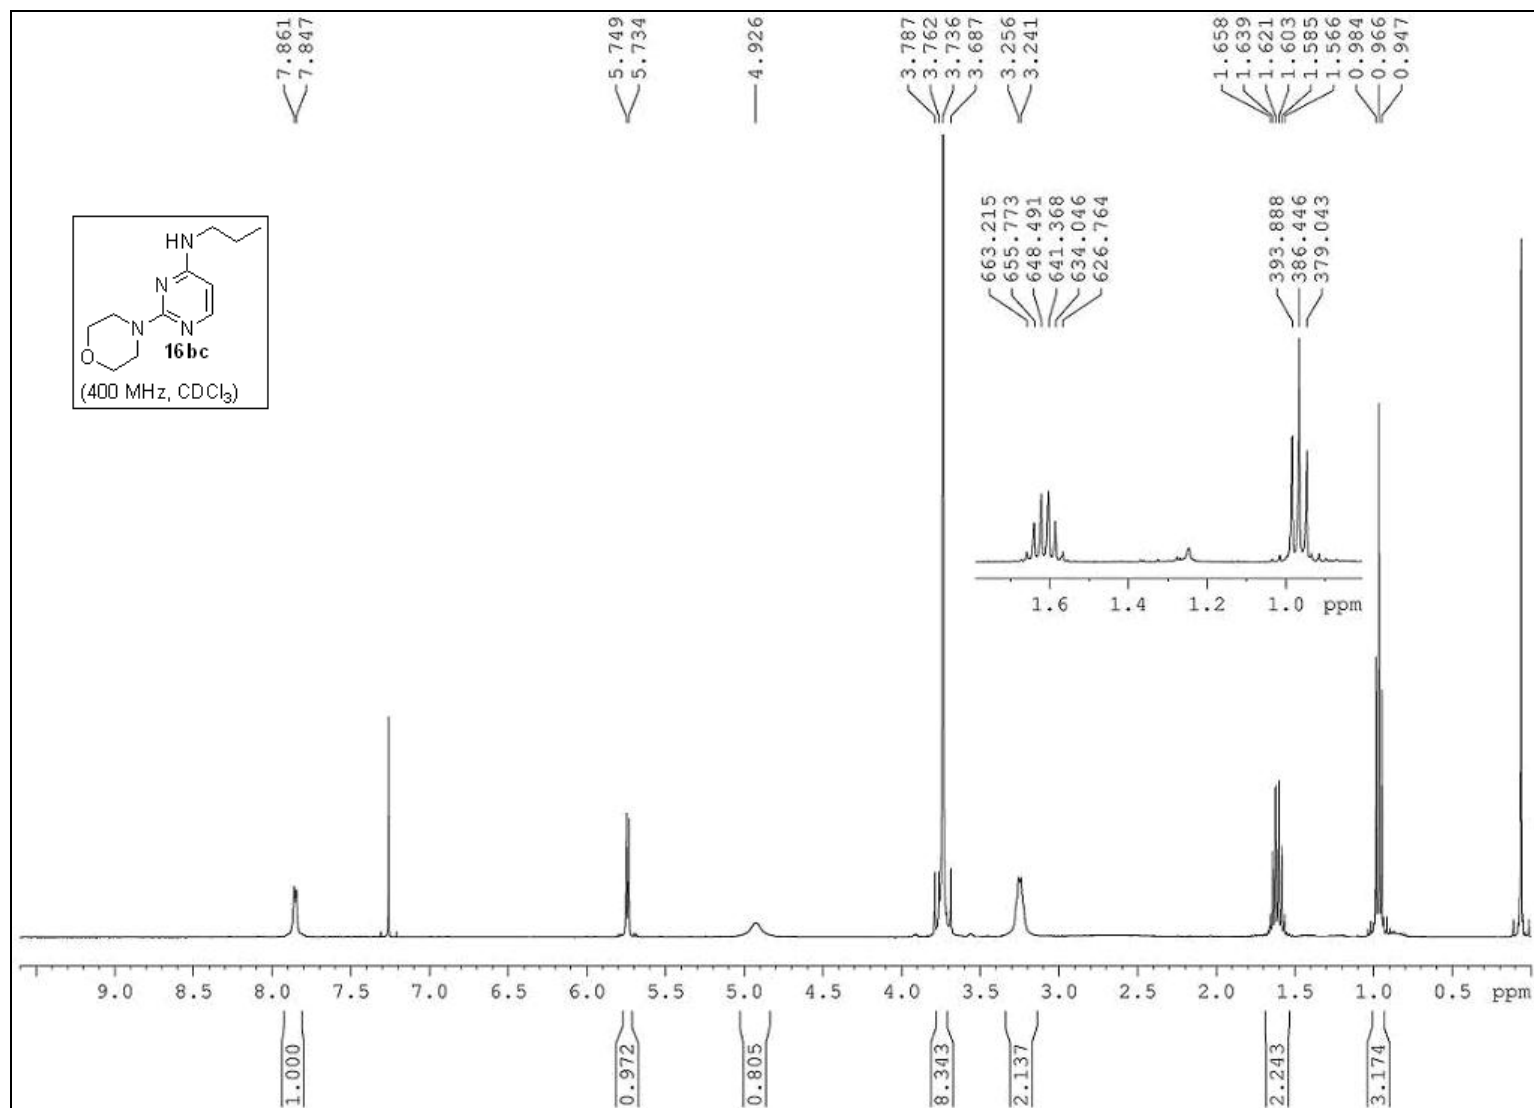

<sup>13</sup>C-NMR of compound **16bc**

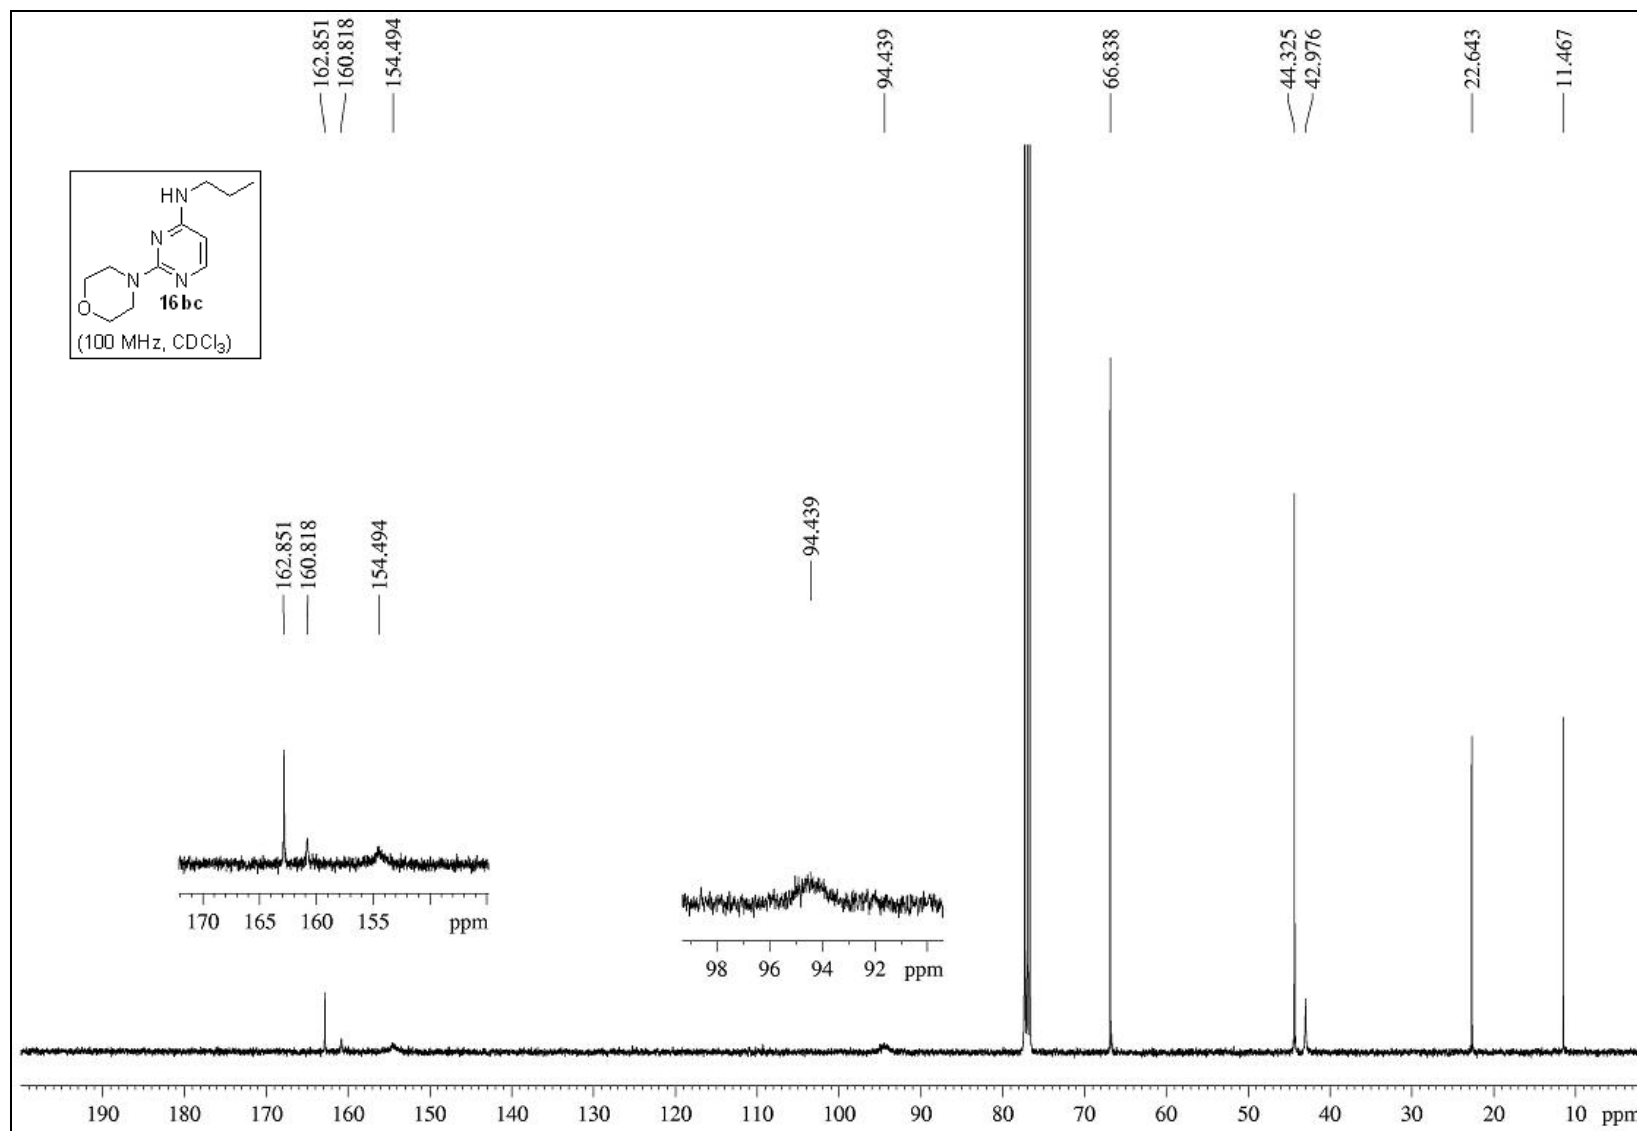

<sup>1</sup>H-NMR of compound **16bd**

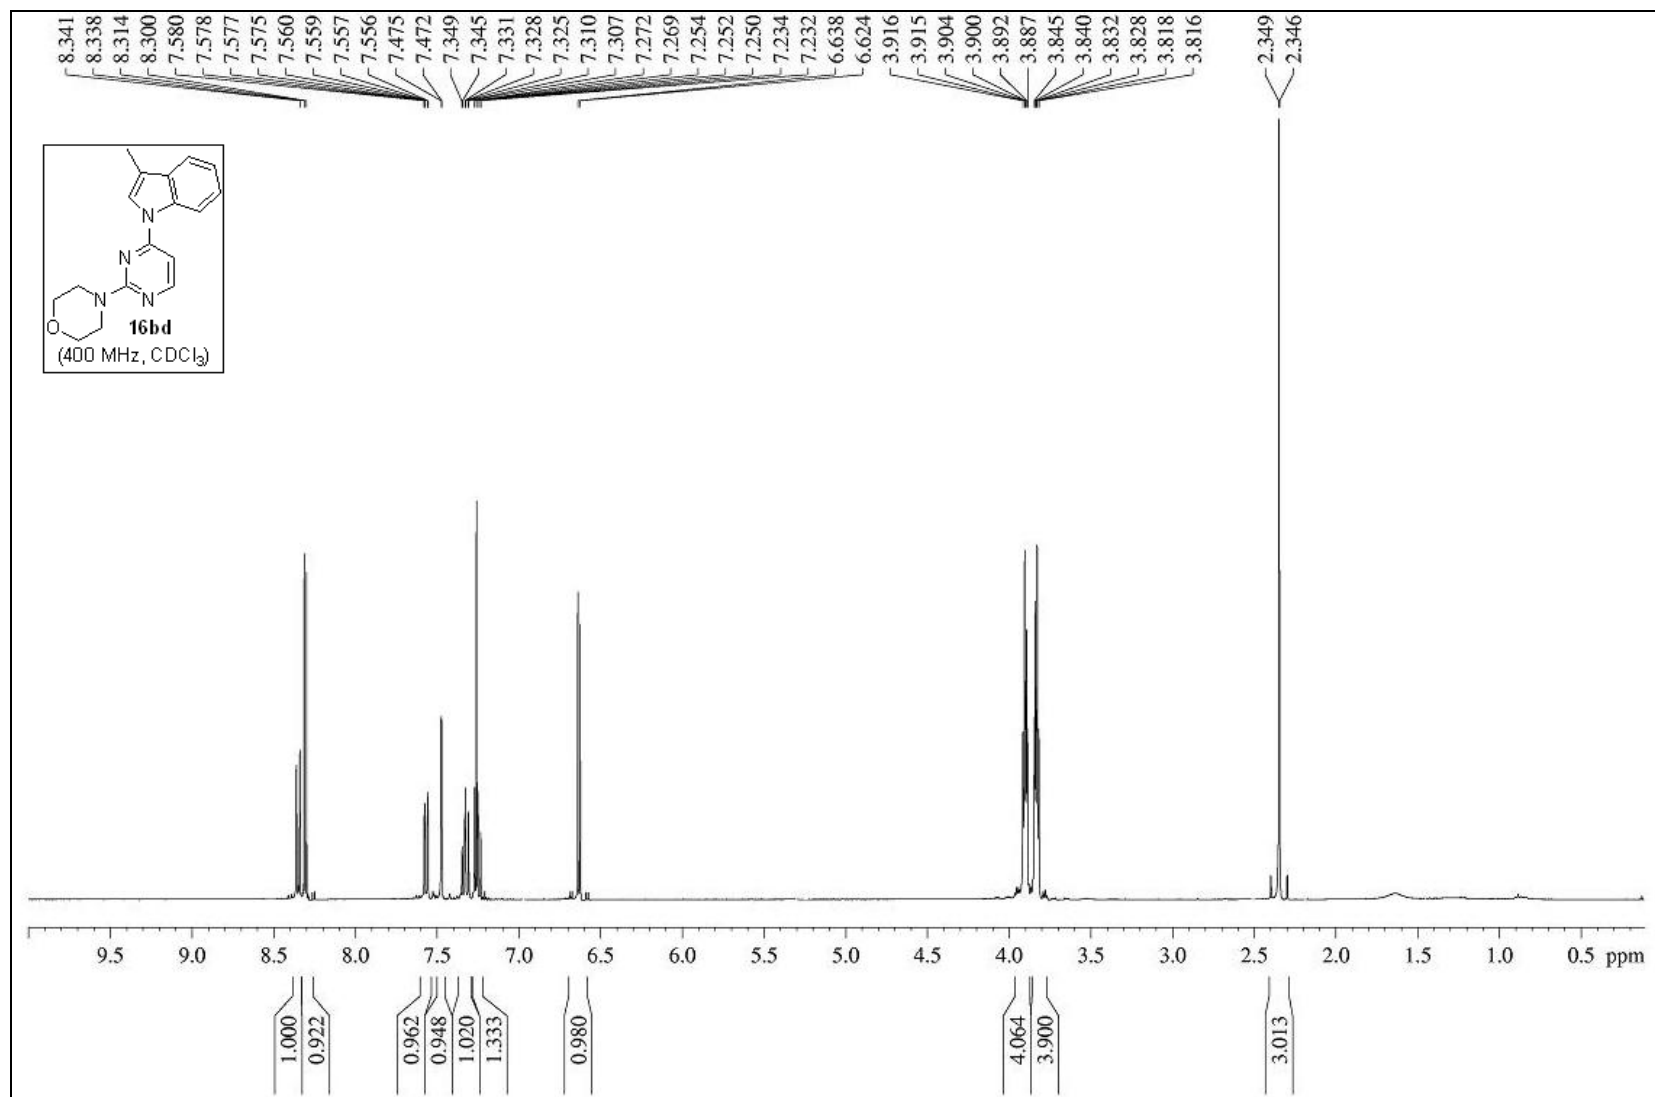

**$^{13}\text{C}$ -NMR and DEPT experiment of compound 16bd**

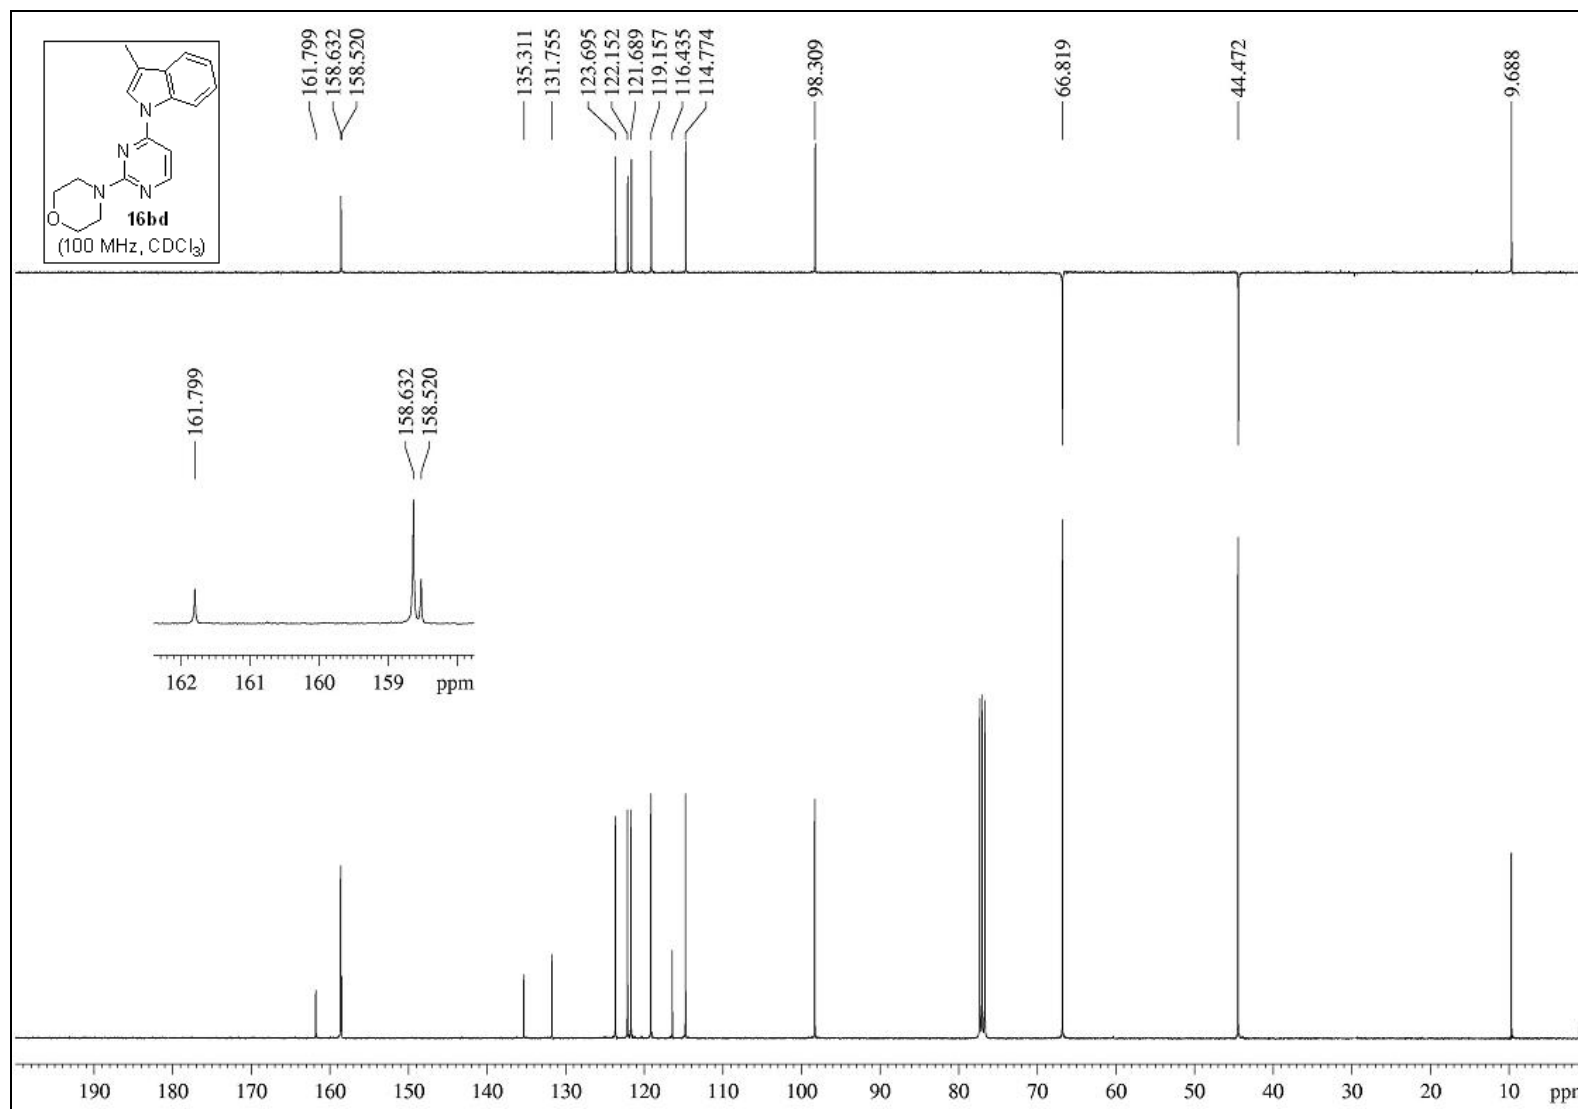

<sup>1</sup>H-NMR of compound **16be**

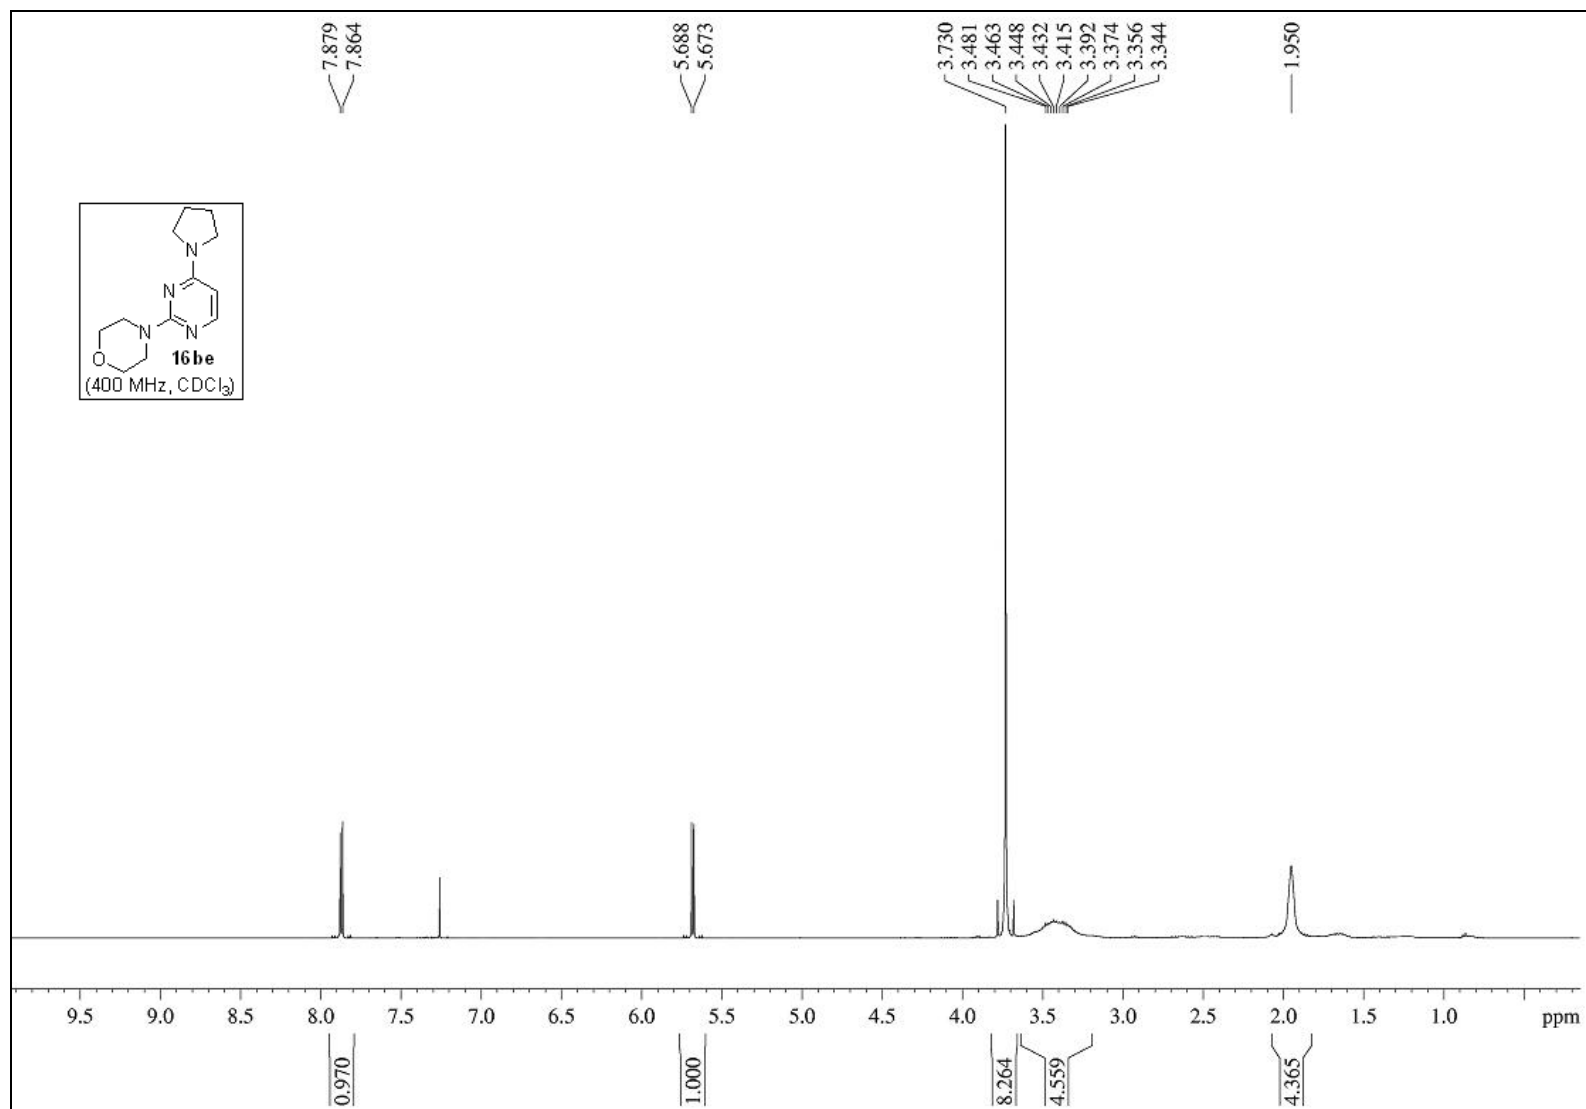

**$^{13}\text{C}$ -NMR and DEPT experiment of compound 16be**

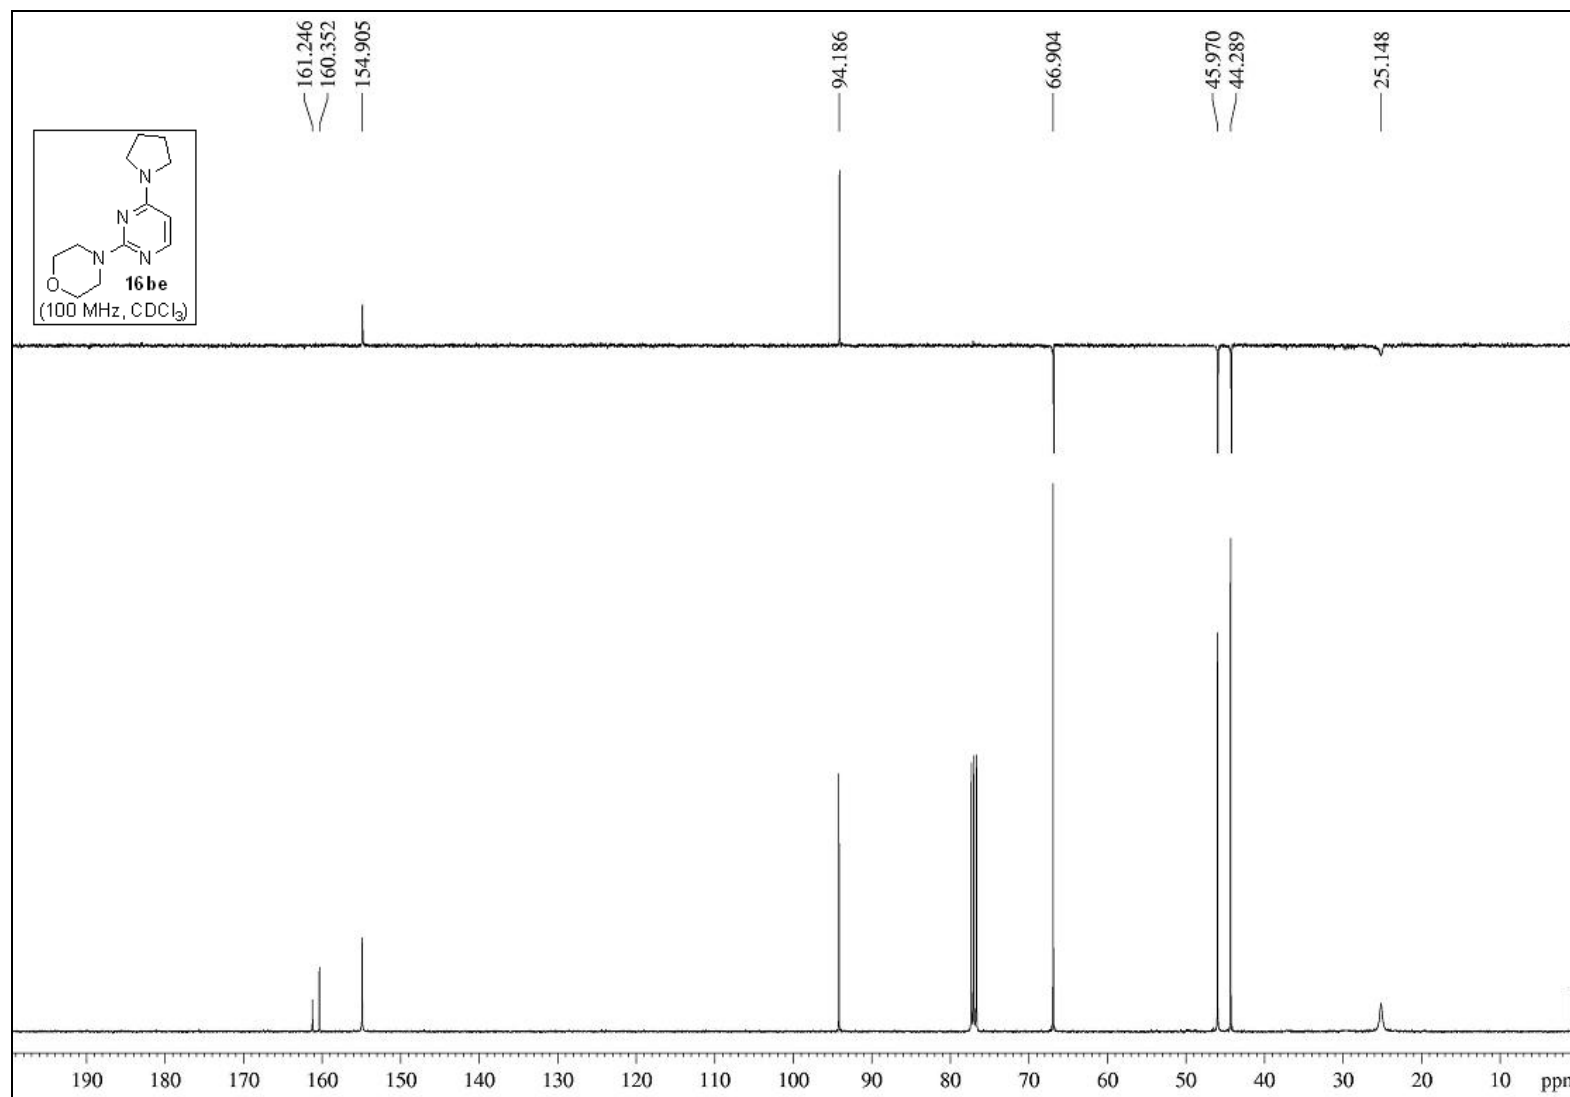

**<sup>1</sup>H-NMR of compound 17b**

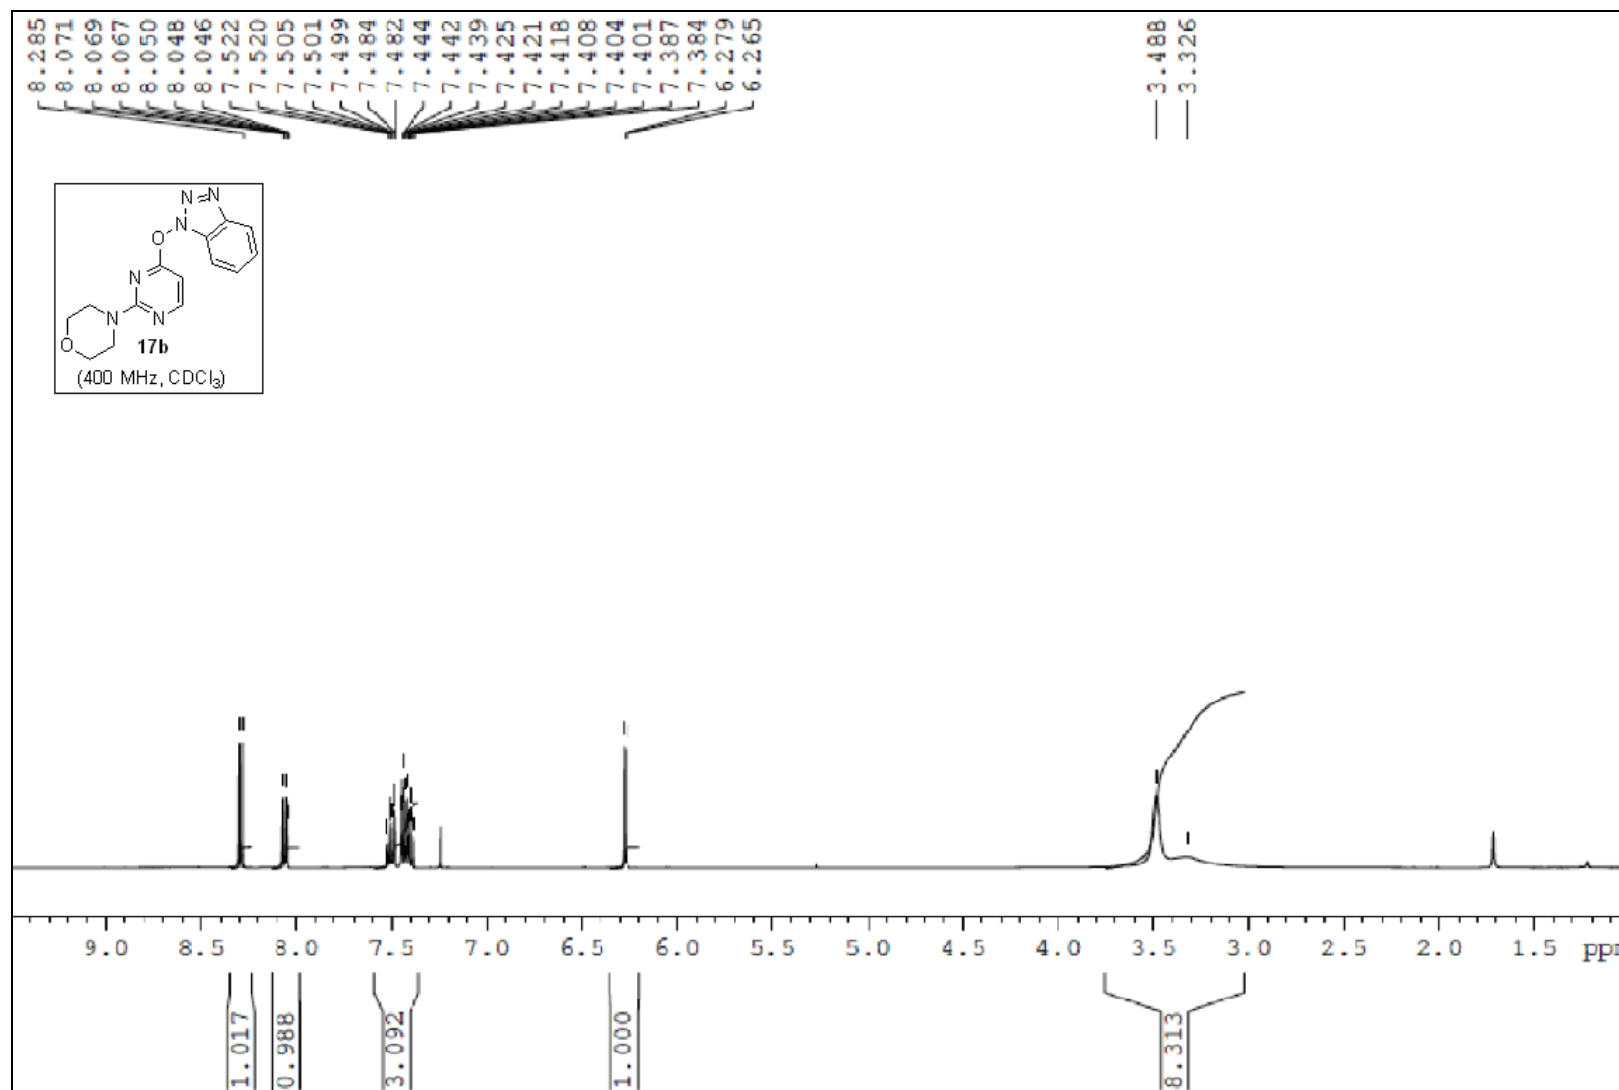

**$^{13}\text{C}$ -NMR and DEPT experiment of compound 17b**

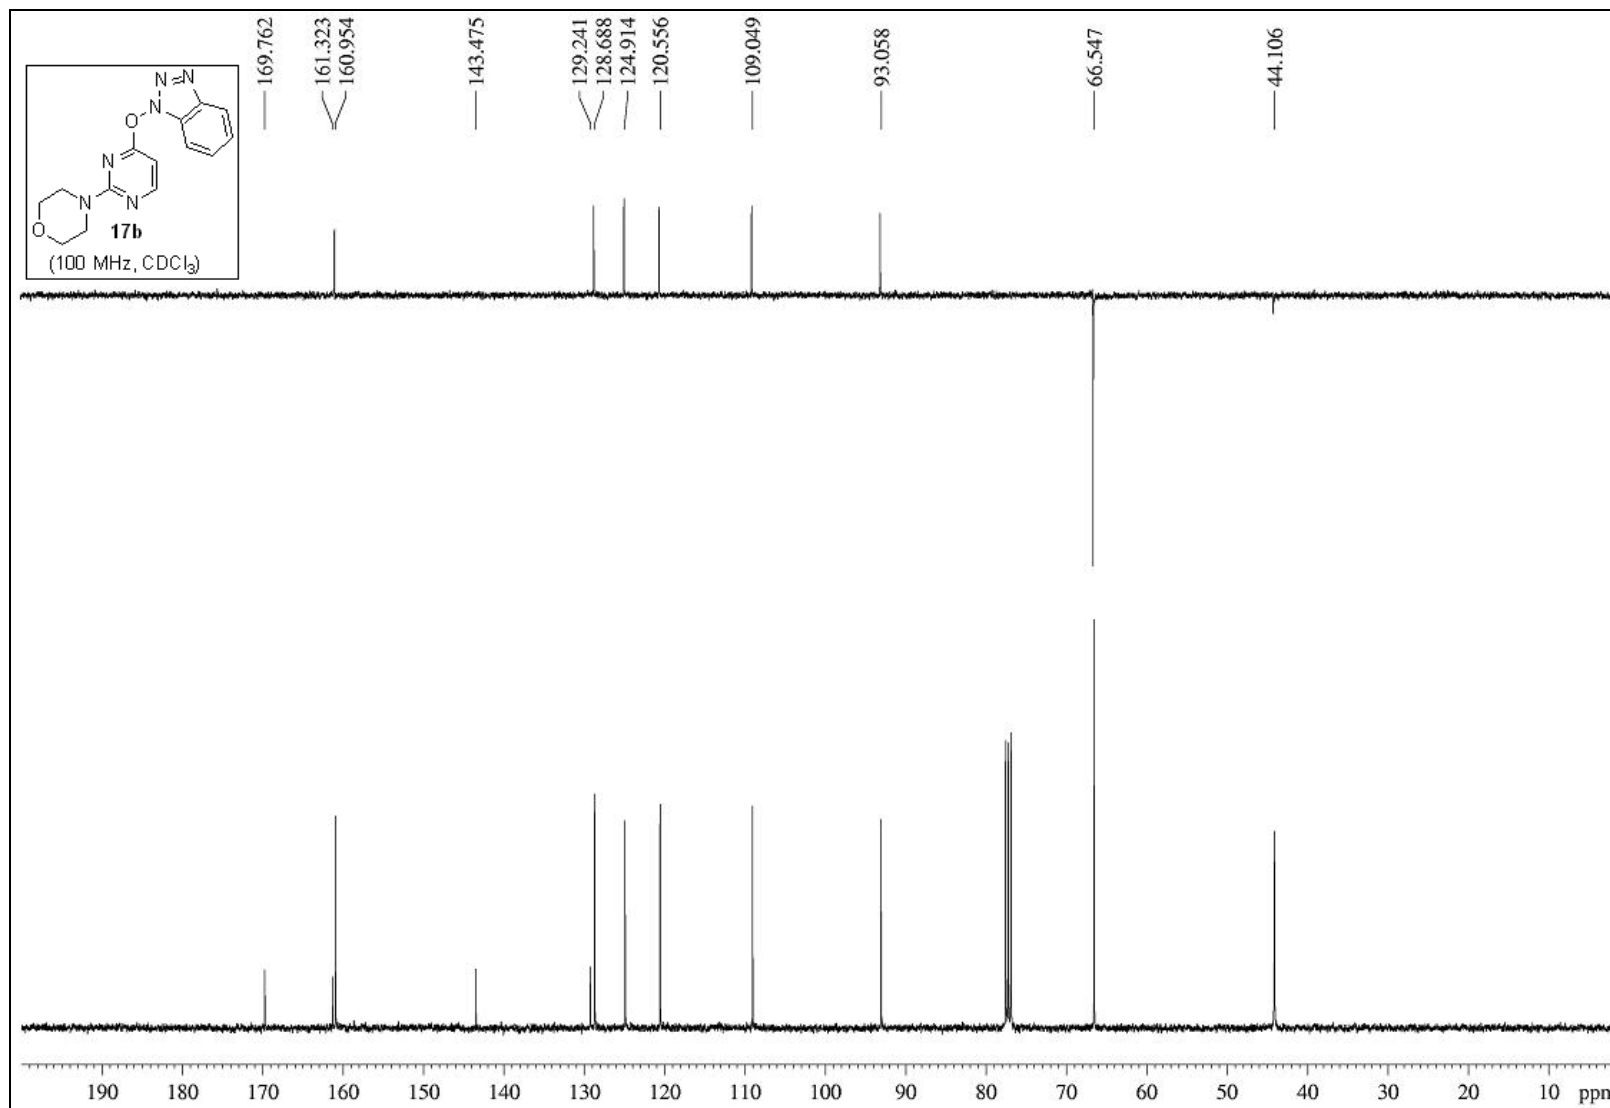

# <sup>1</sup>H-NMR of compound 12a

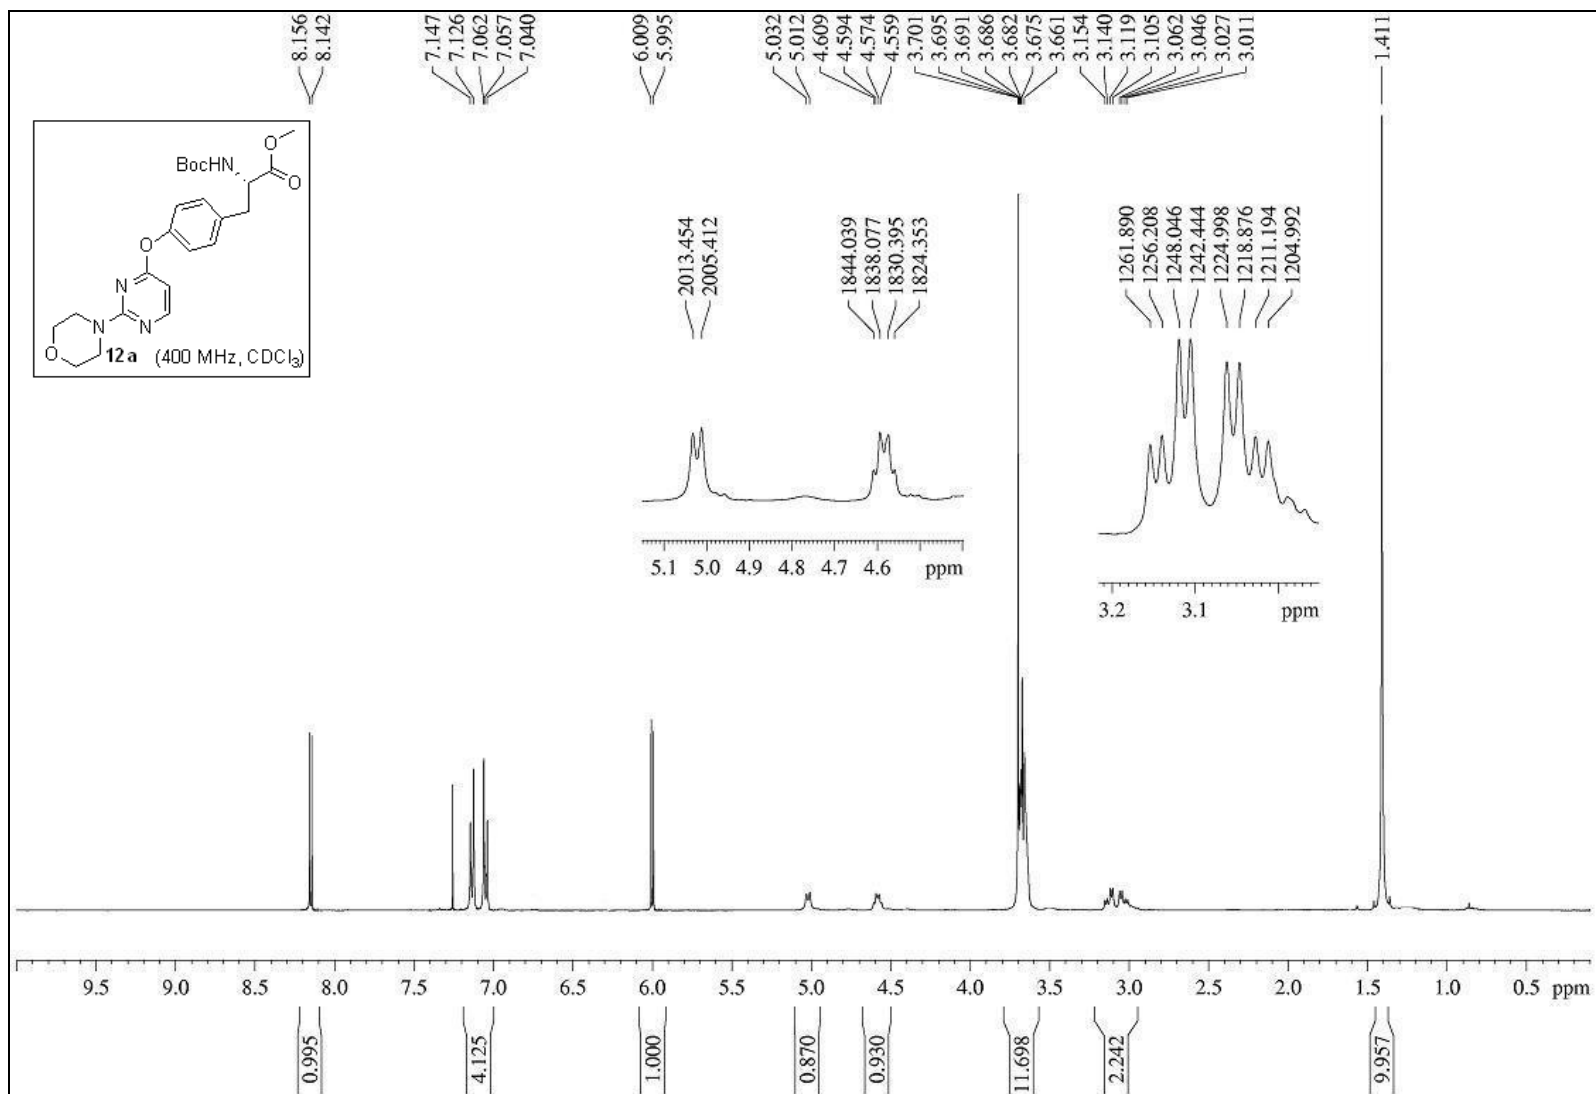



# <sup>1</sup>H-NMR of compound 12b

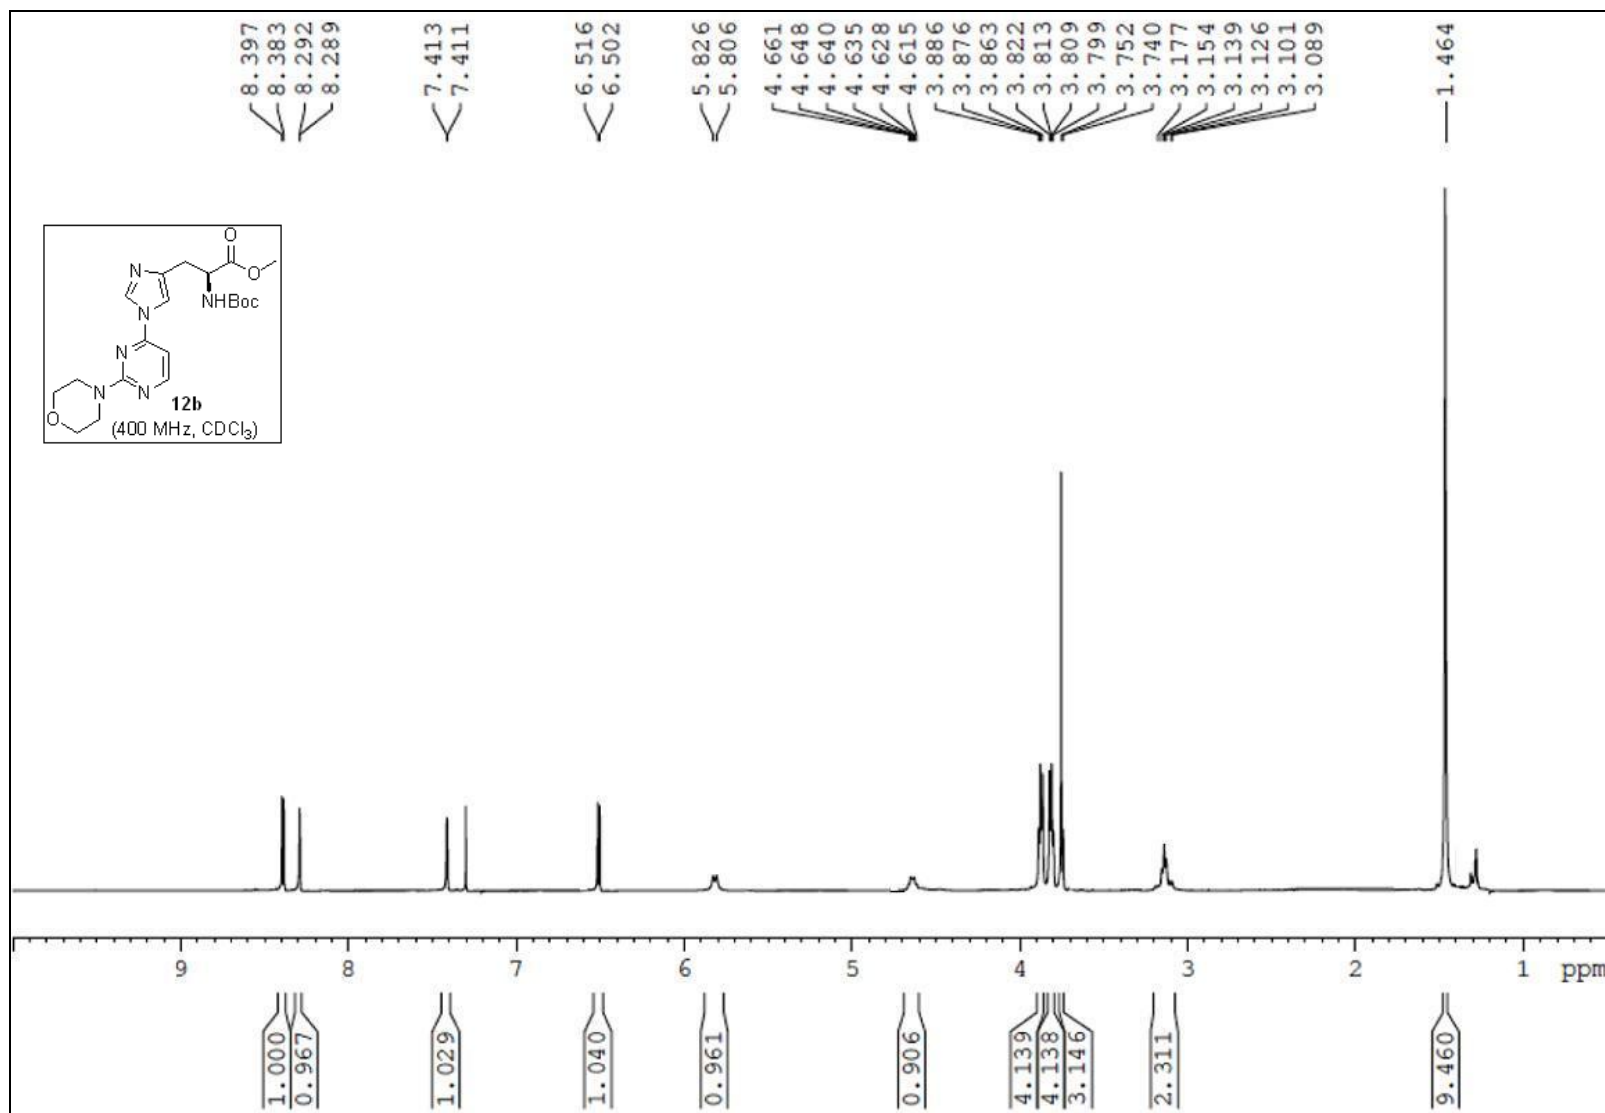

**$^{13}\text{C}$ -NMR and DEPT experiment of compound 12b**

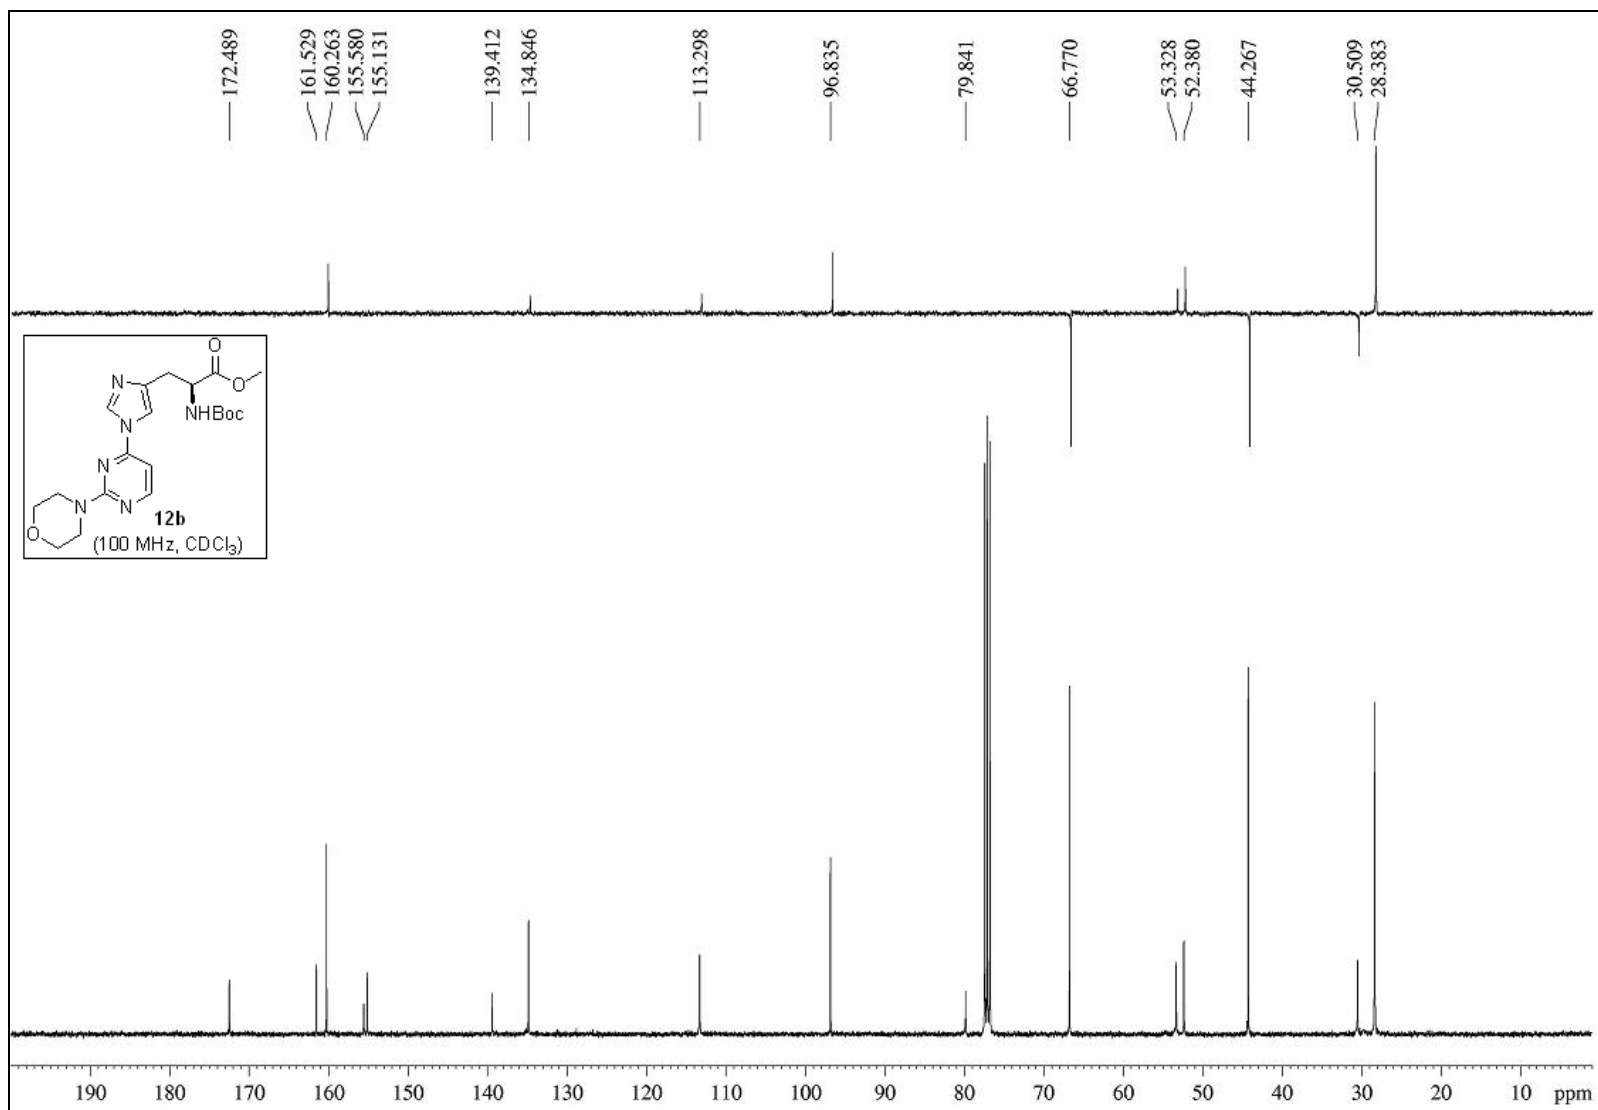

# <sup>1</sup>H-NMR of compound 12c

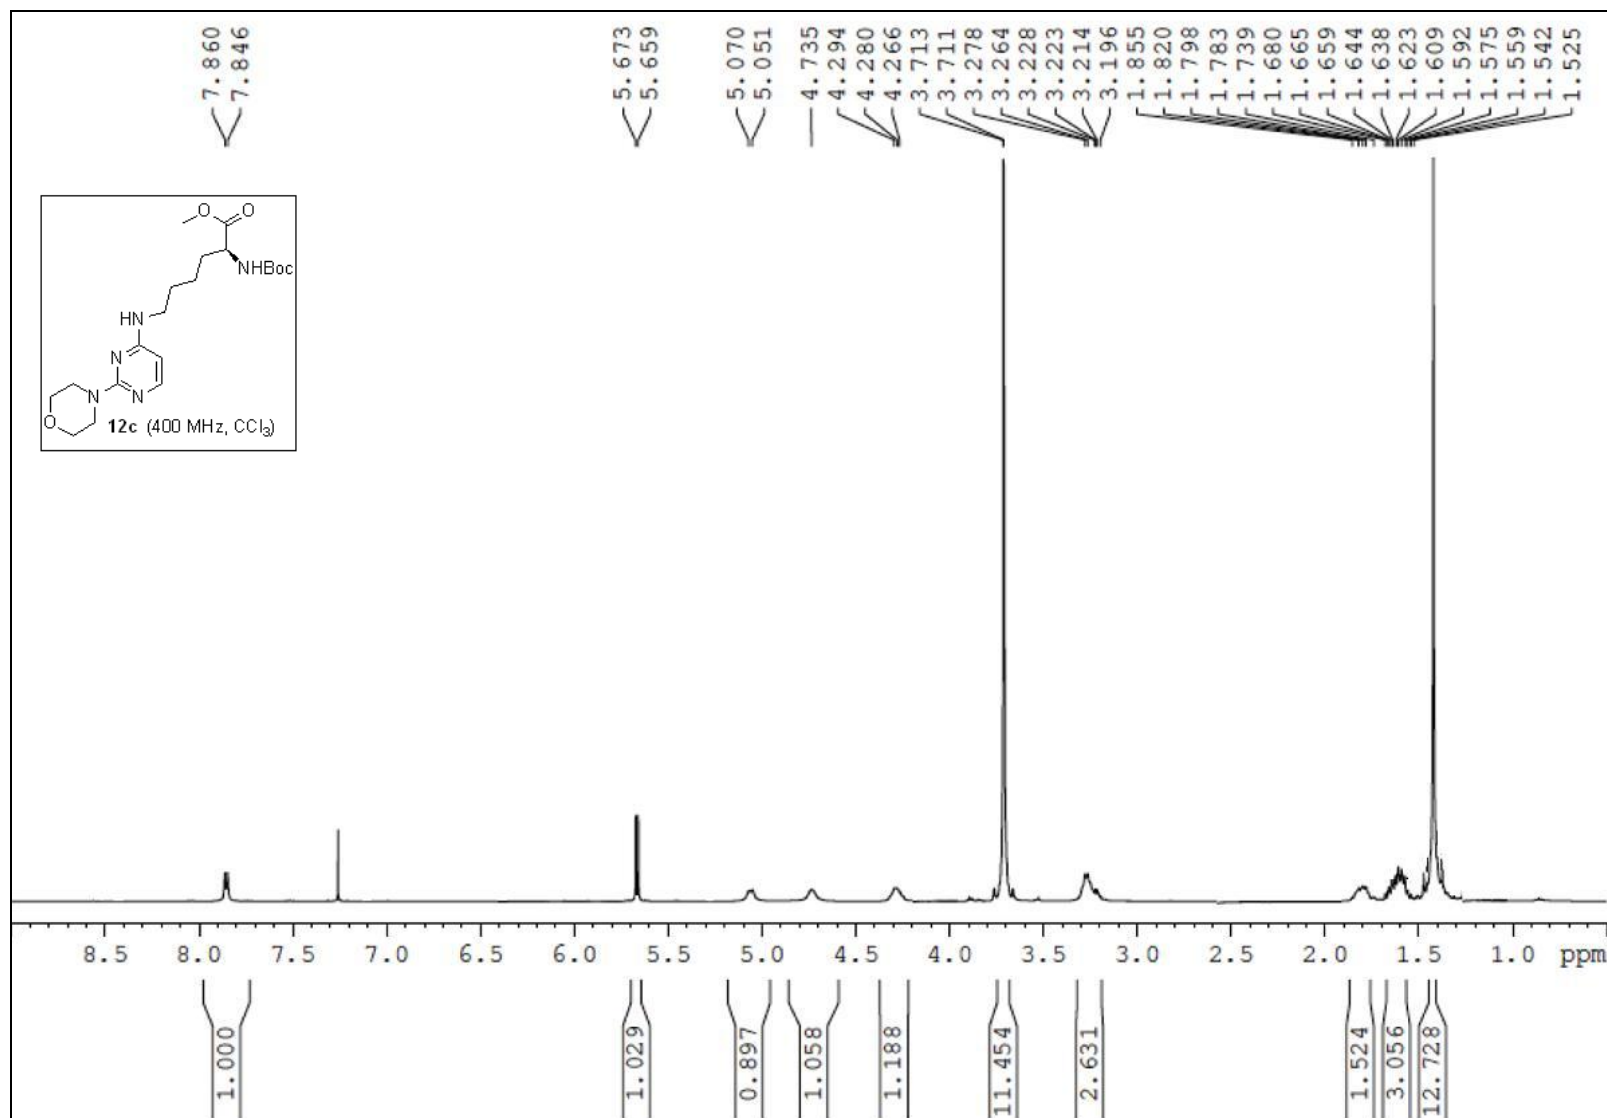

**$^{13}\text{C}$ -NMR and DEPT experiment of compound 12c**

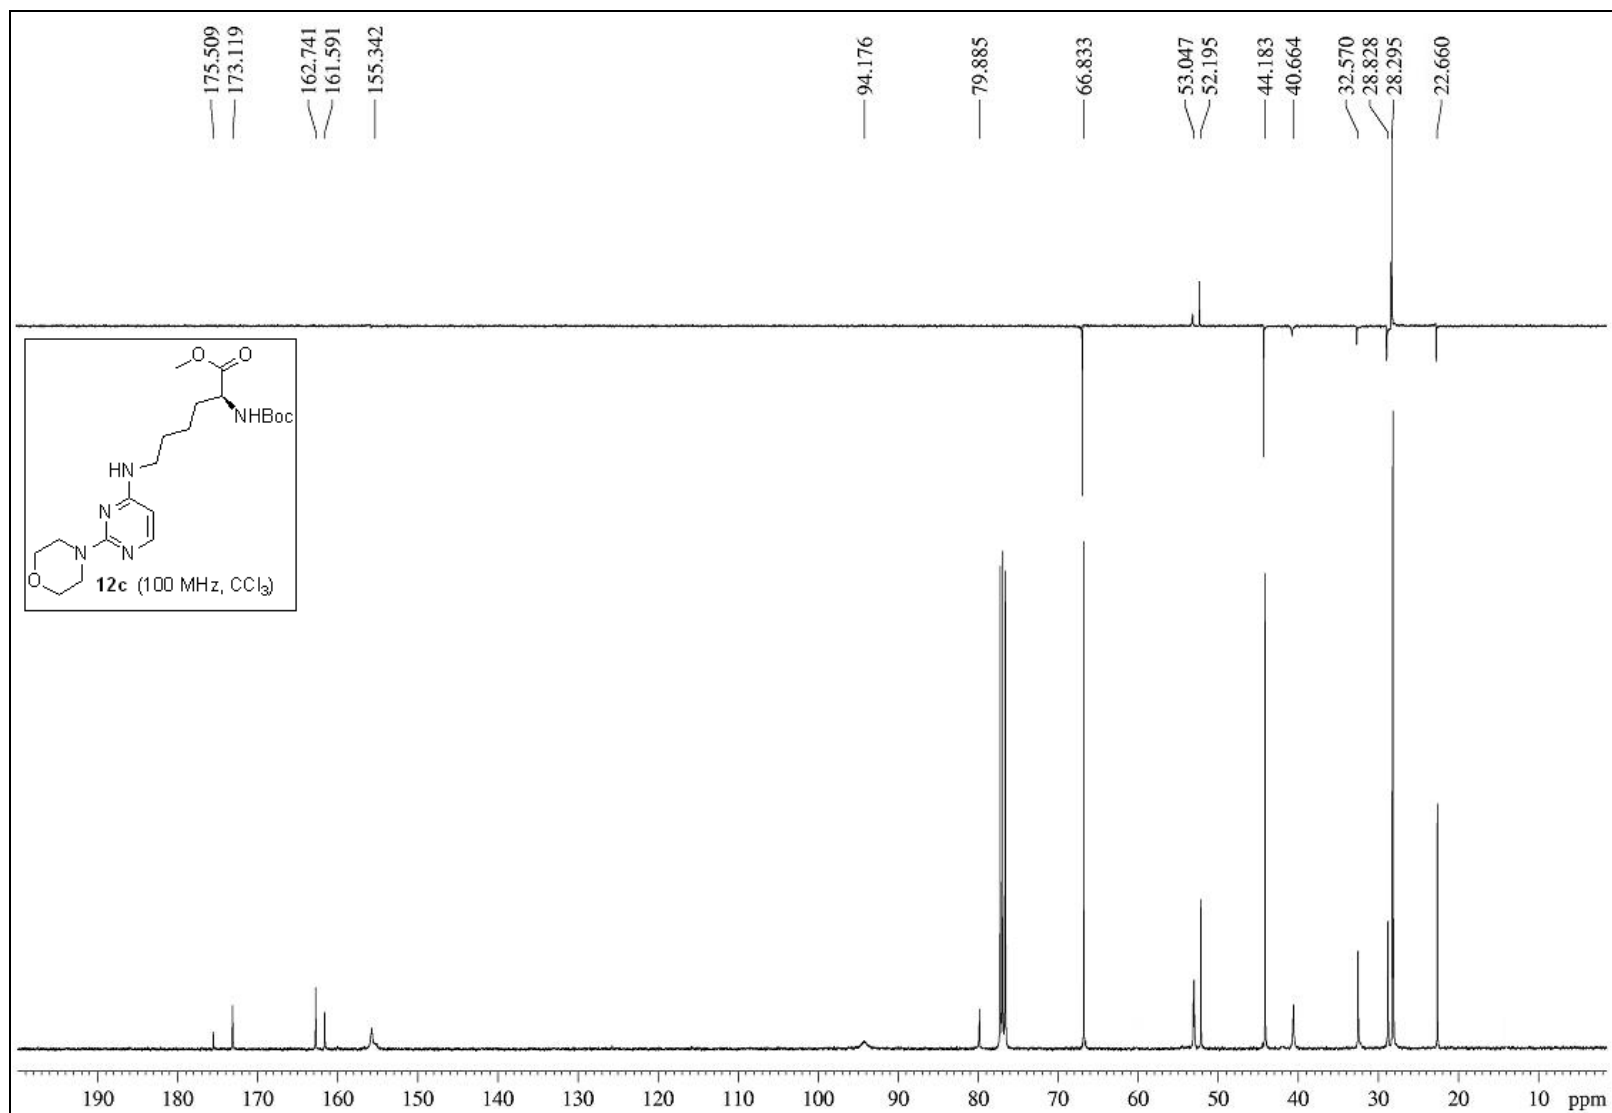

<sup>1</sup>H-NMR of compound 12d

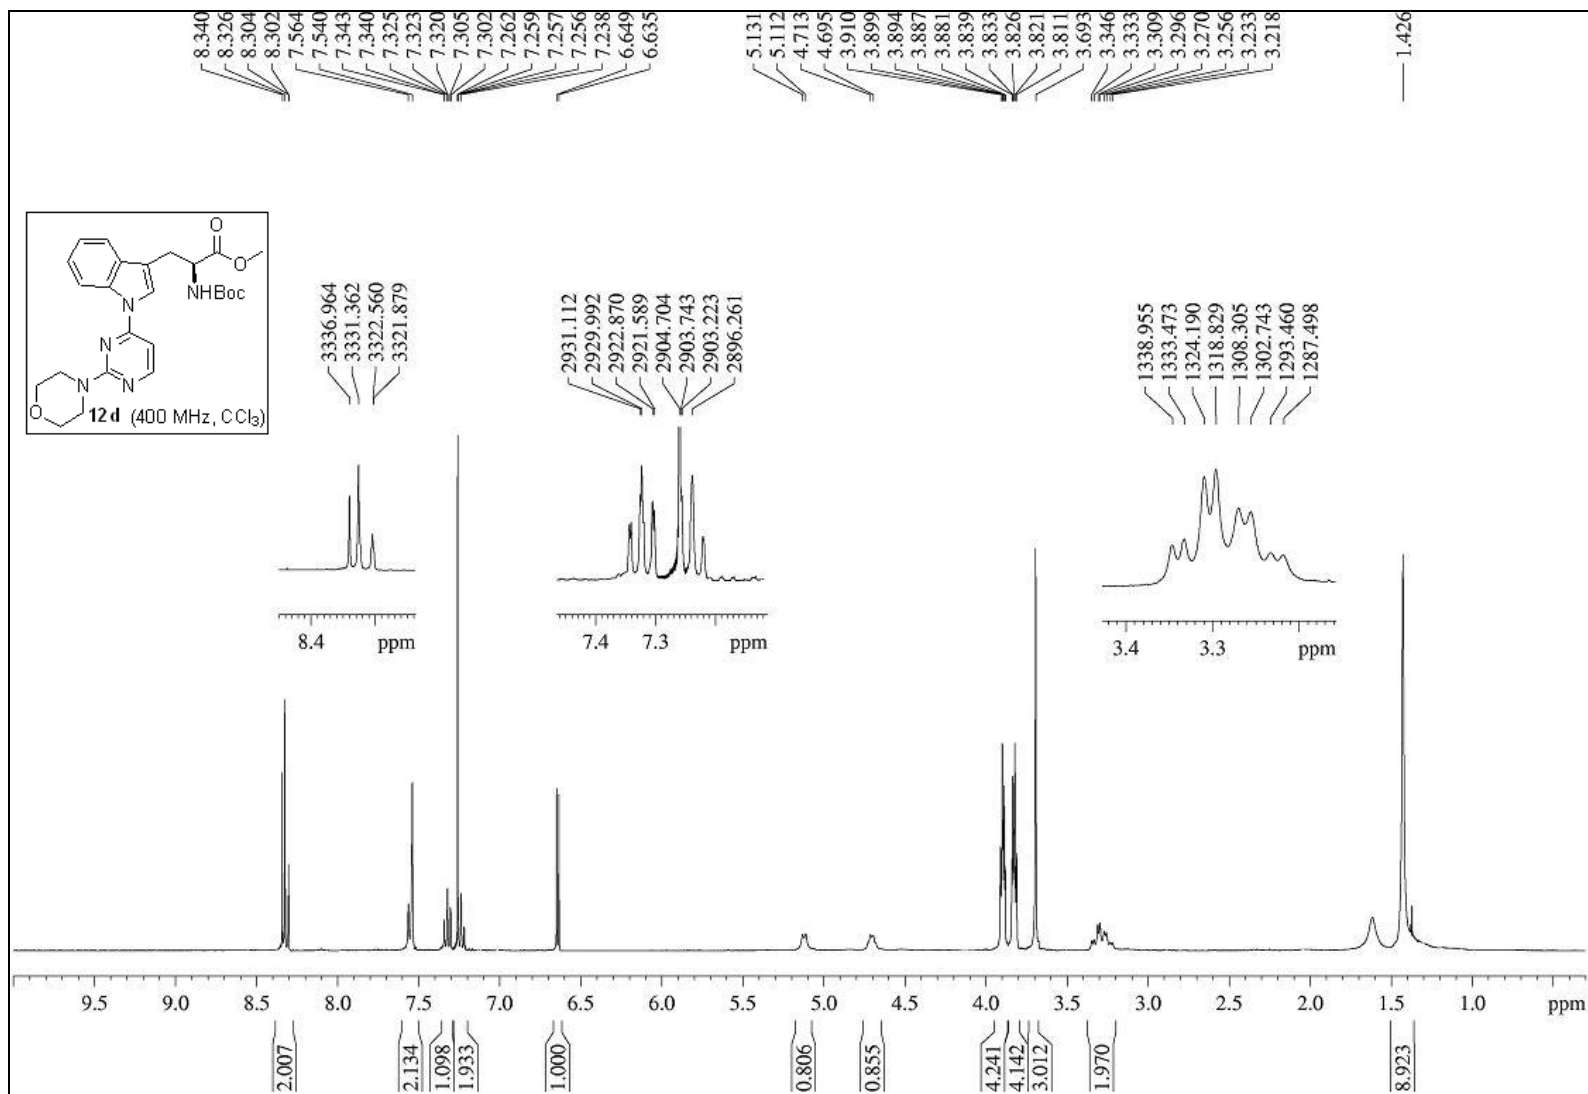

# <sup>13</sup>C-NMR of compound 12d

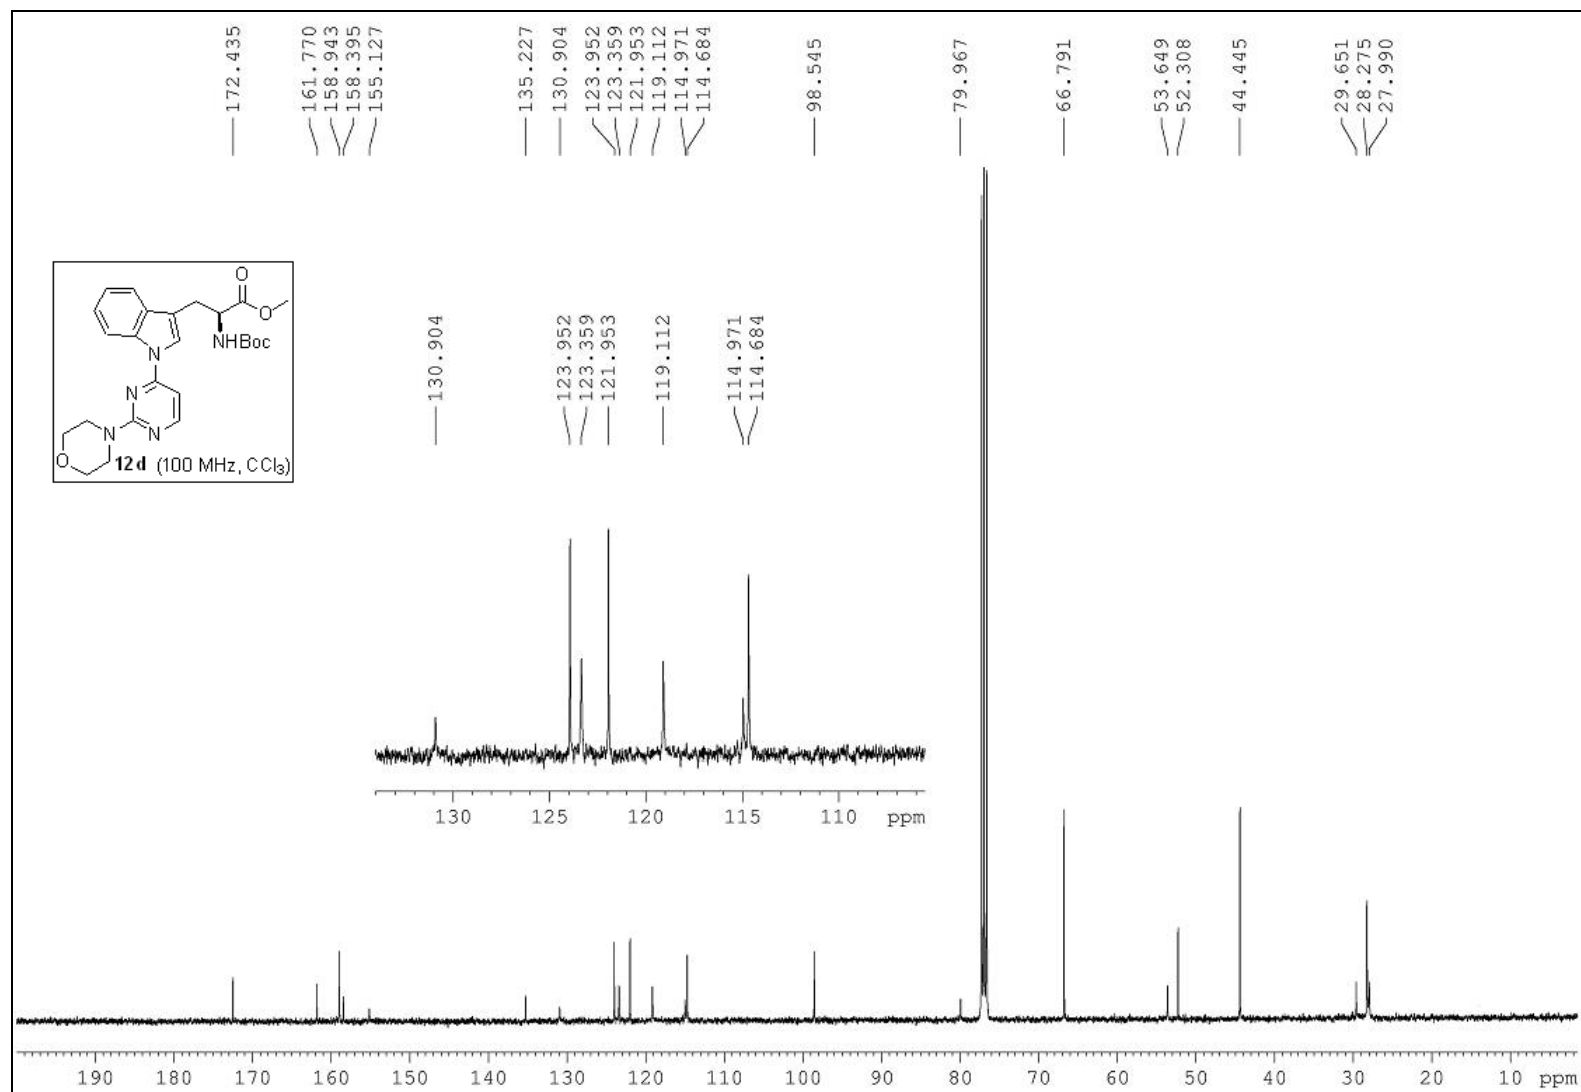

## HSQC-ed experiment of compound 12d

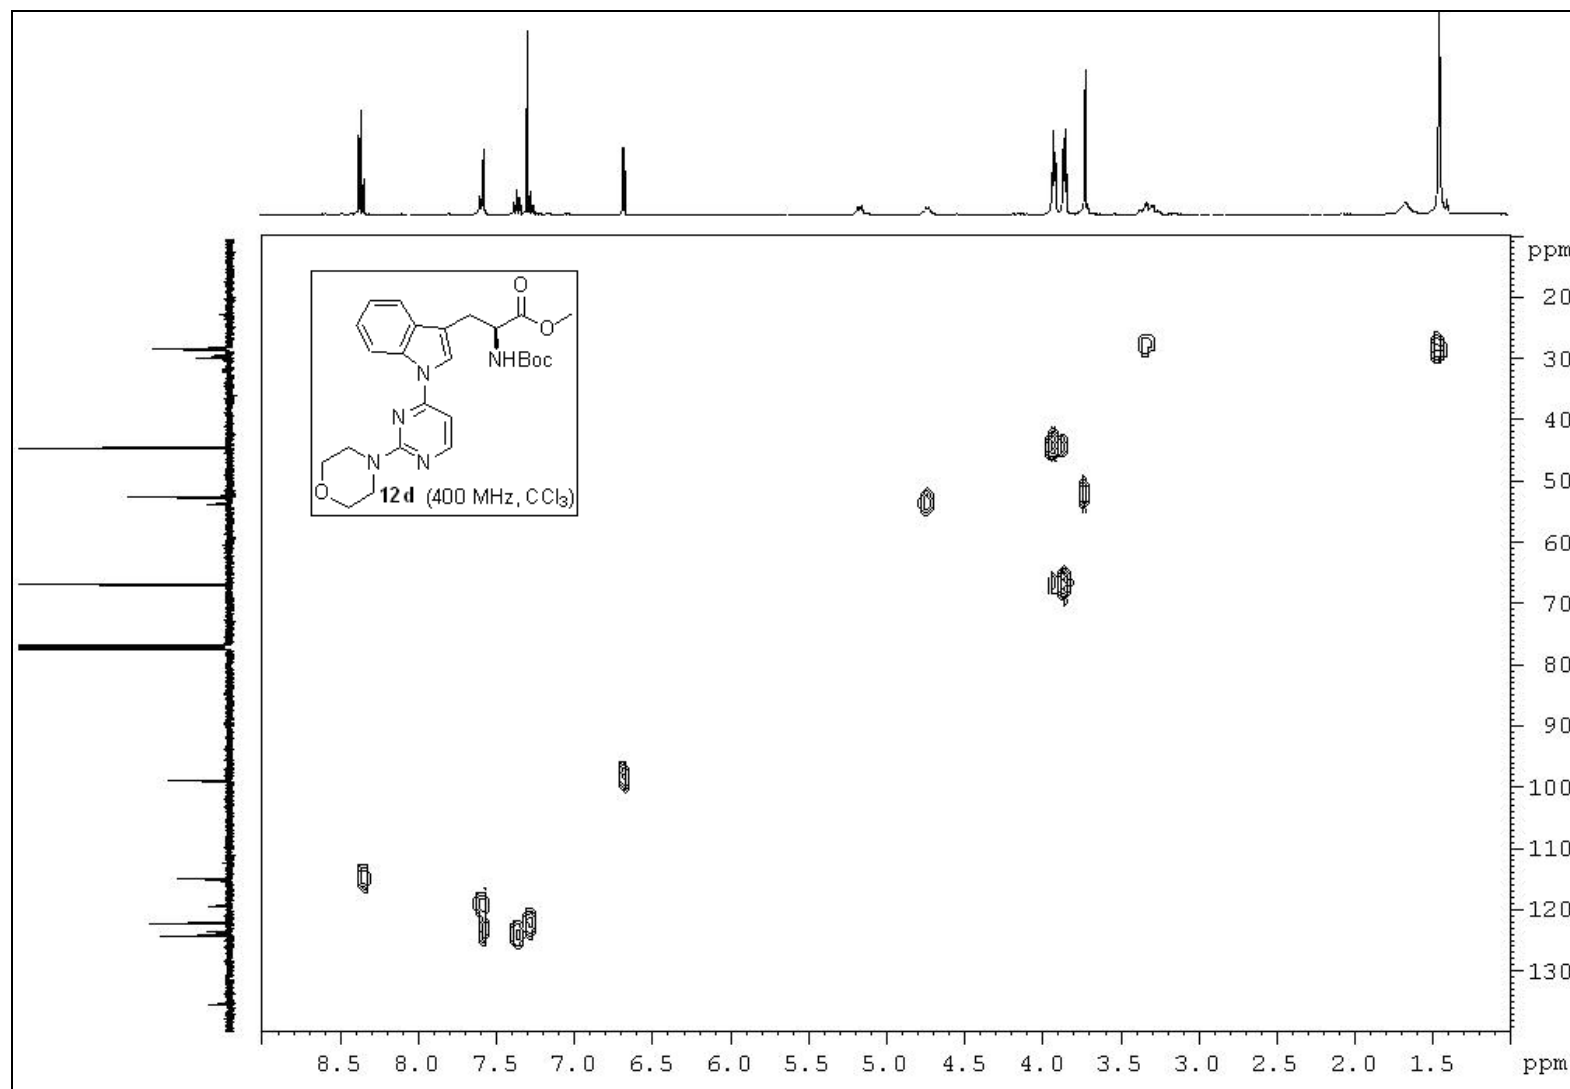

# <sup>1</sup>H-NMR of compound 12e

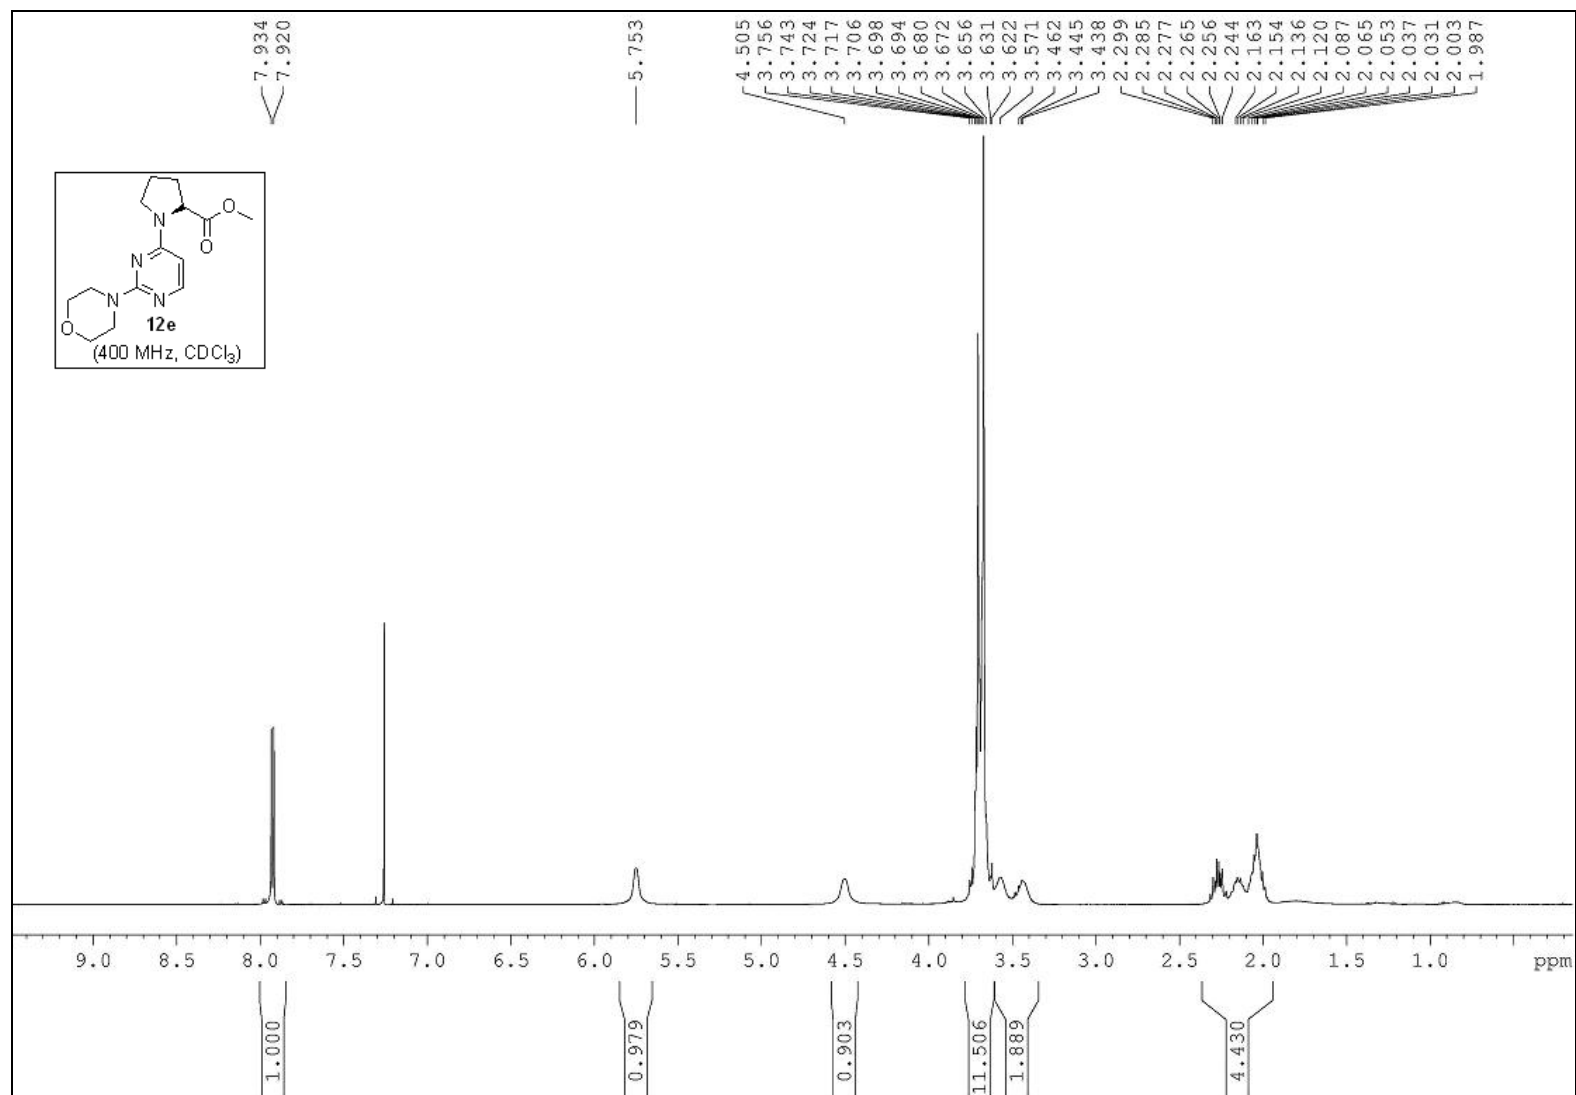

**$^{13}\text{C}$ -NMR and DEPT experiment of compound 12e**

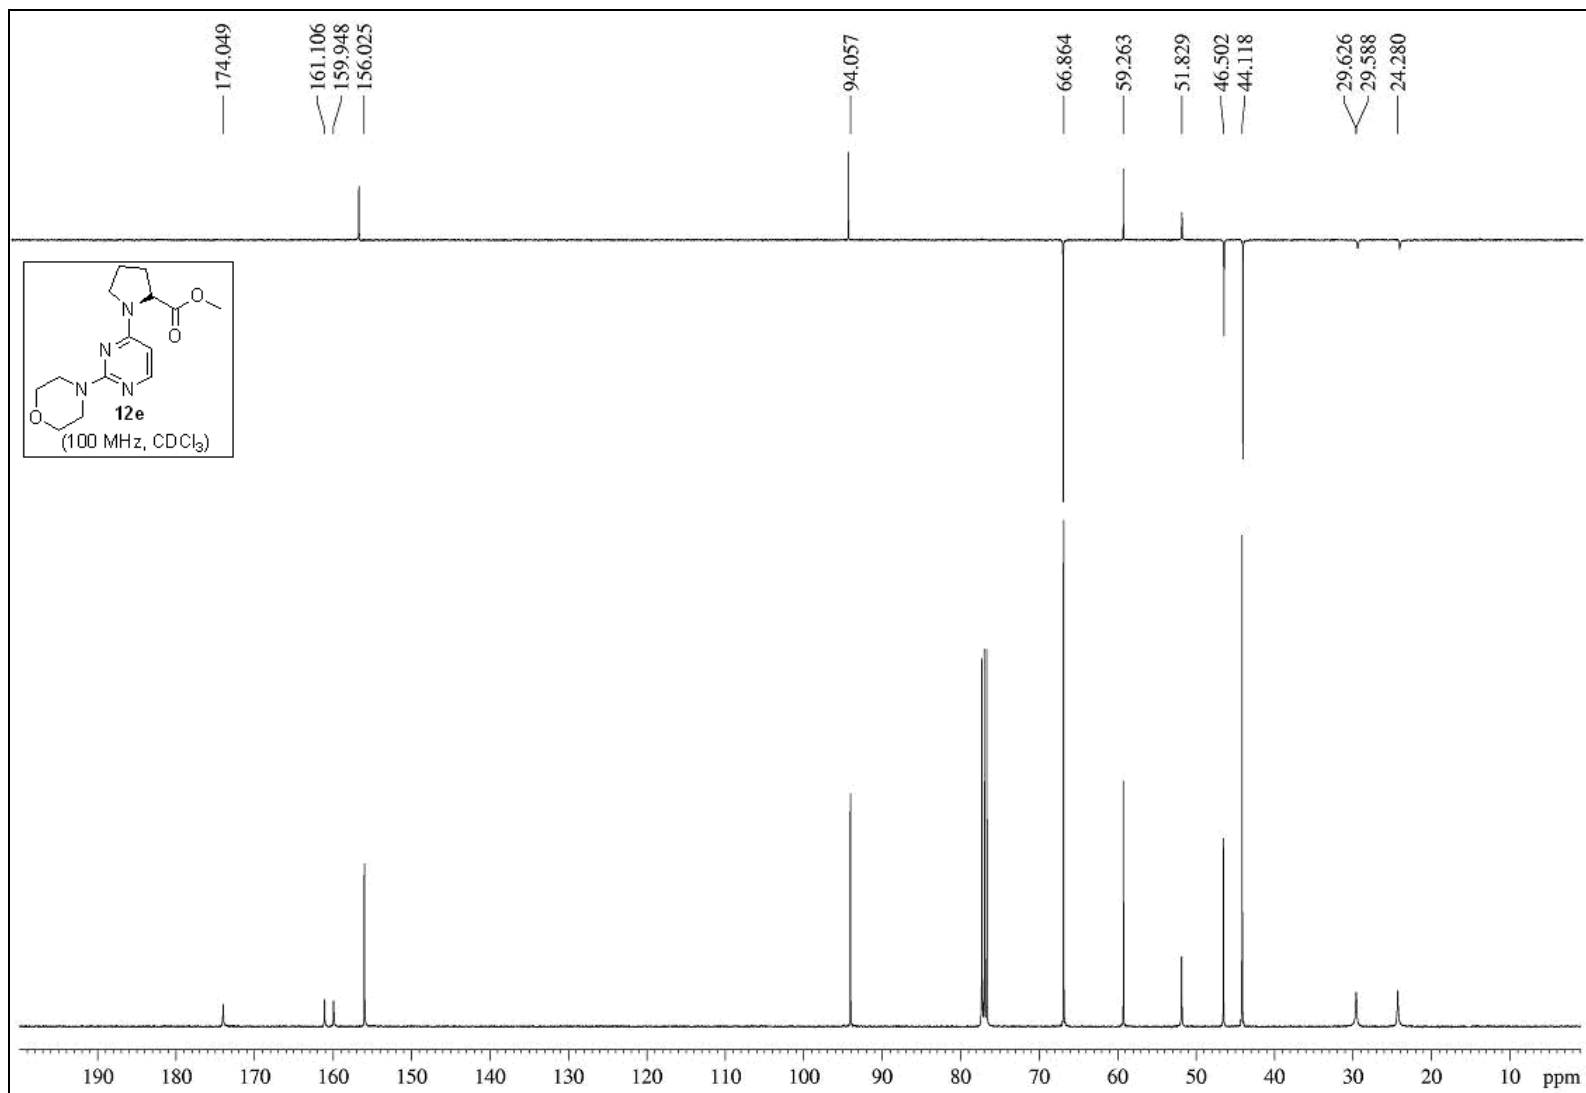

# <sup>1</sup>H-NMR of compound 18a

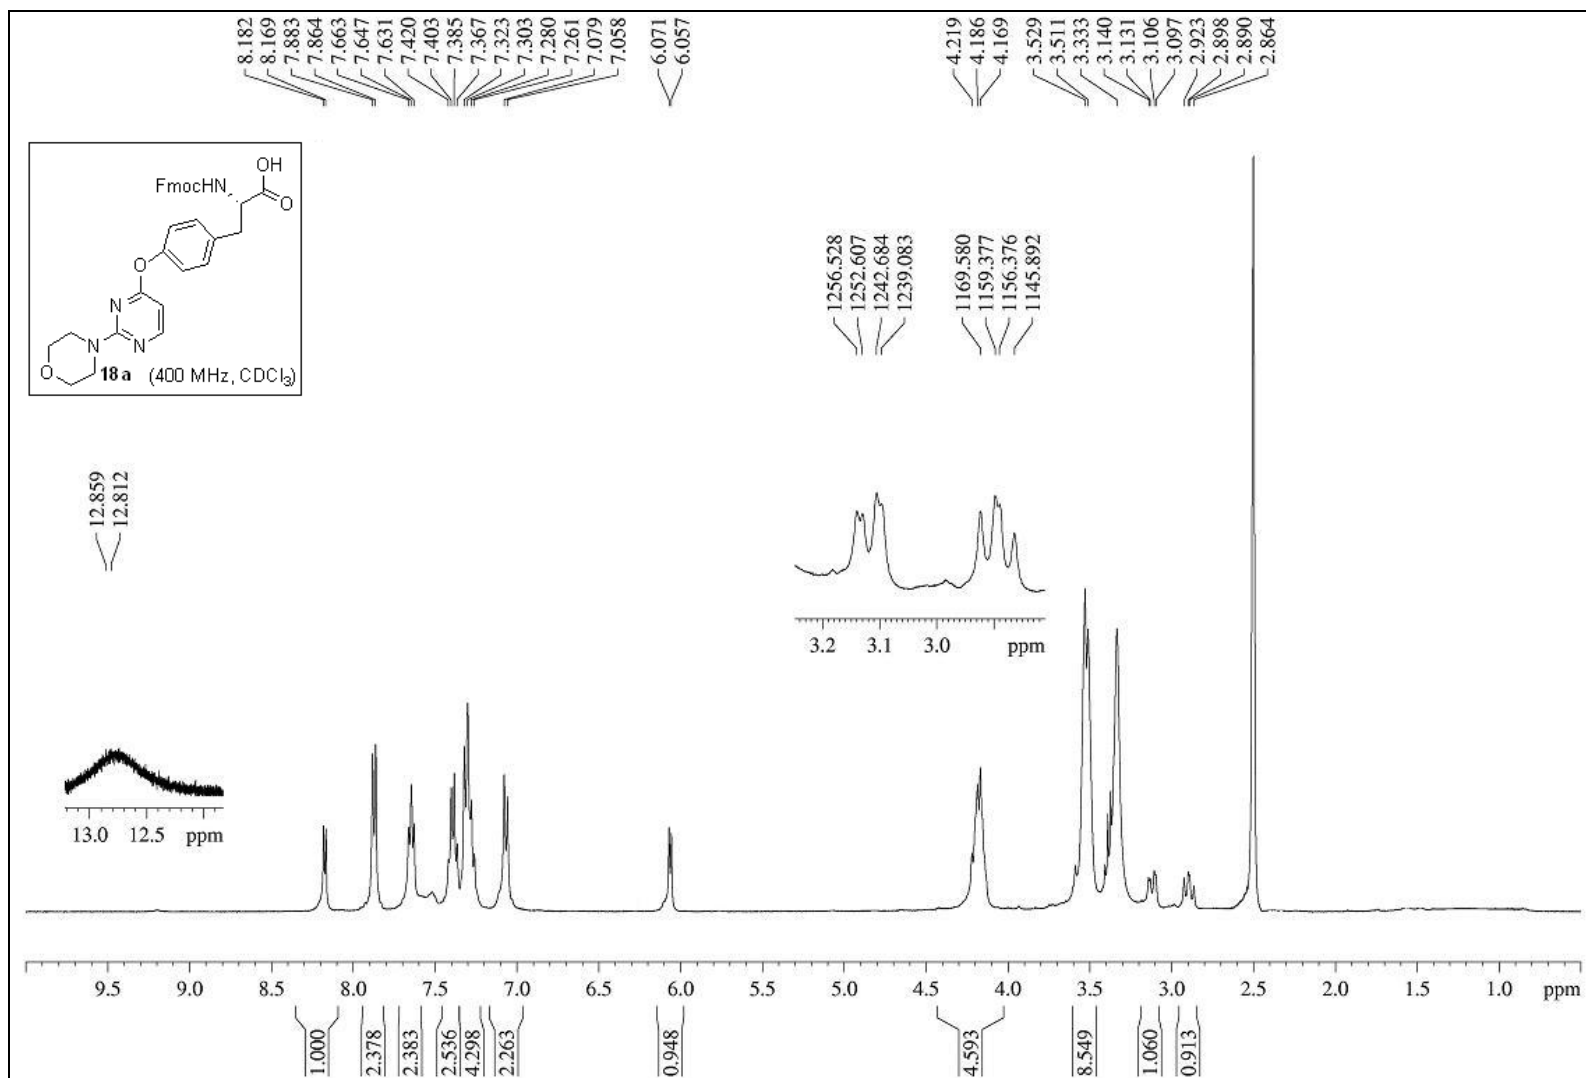

**$^{13}\text{C}$ -NMR and DEPT experiment of compound 18a**

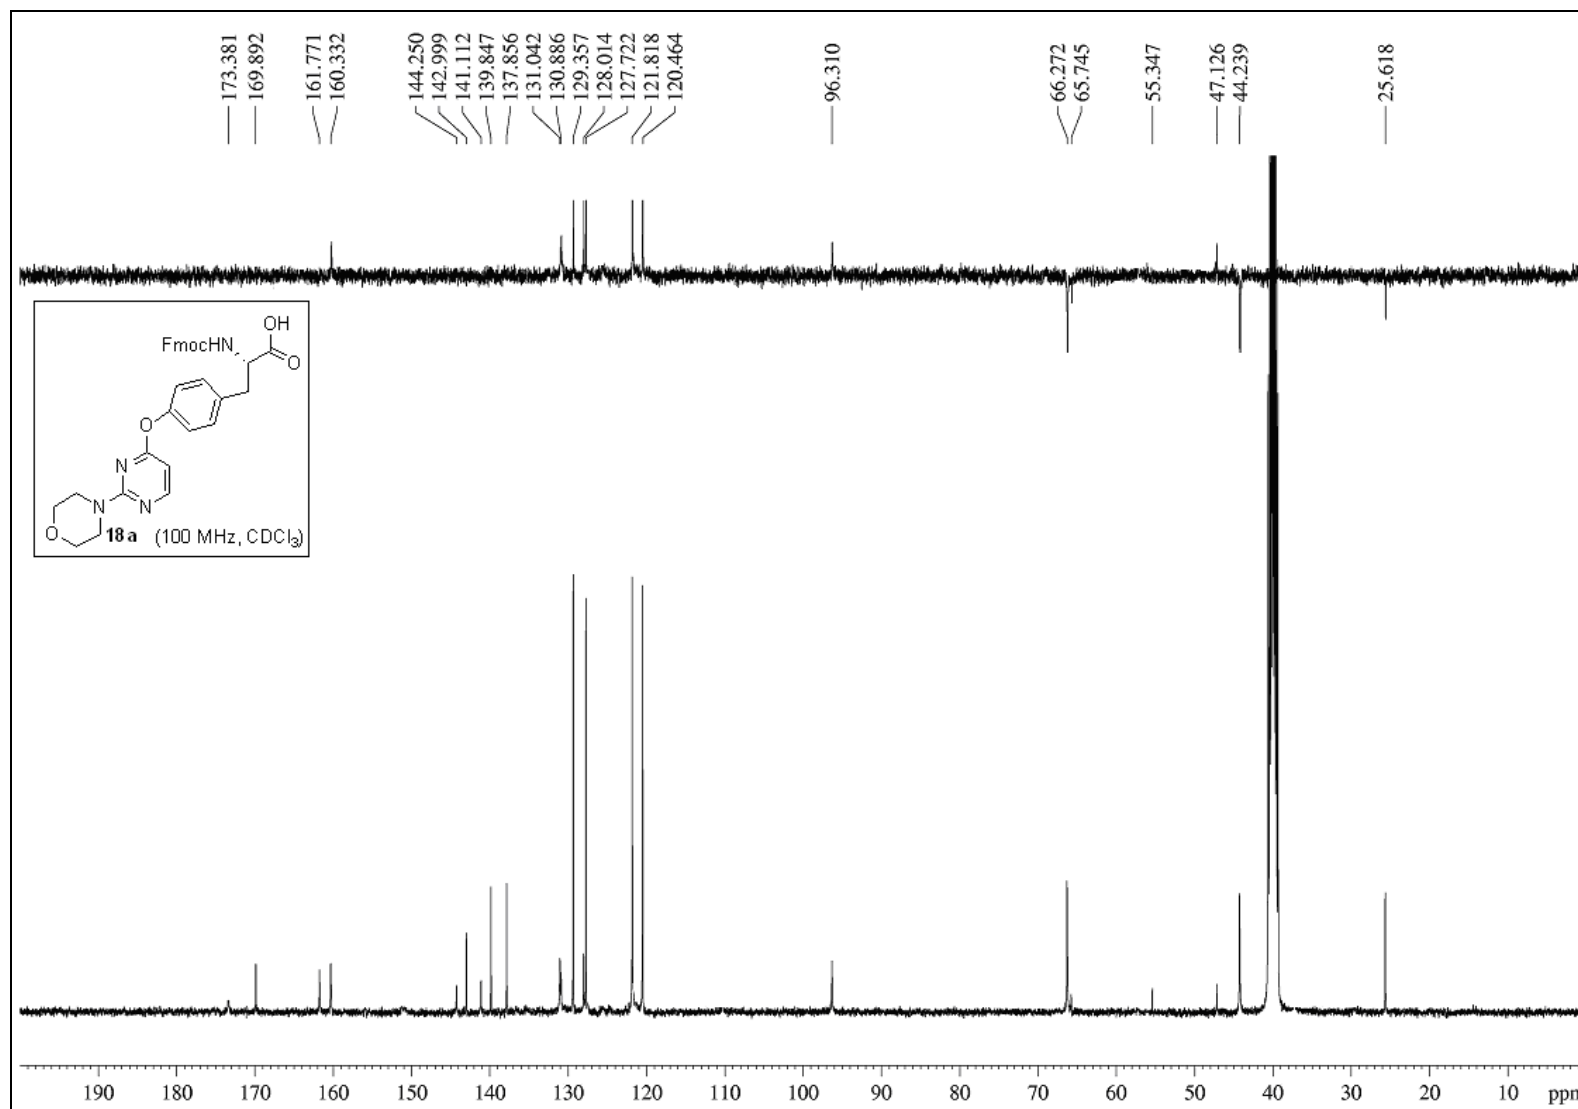

<sup>1</sup>H-NMR of compound 18b

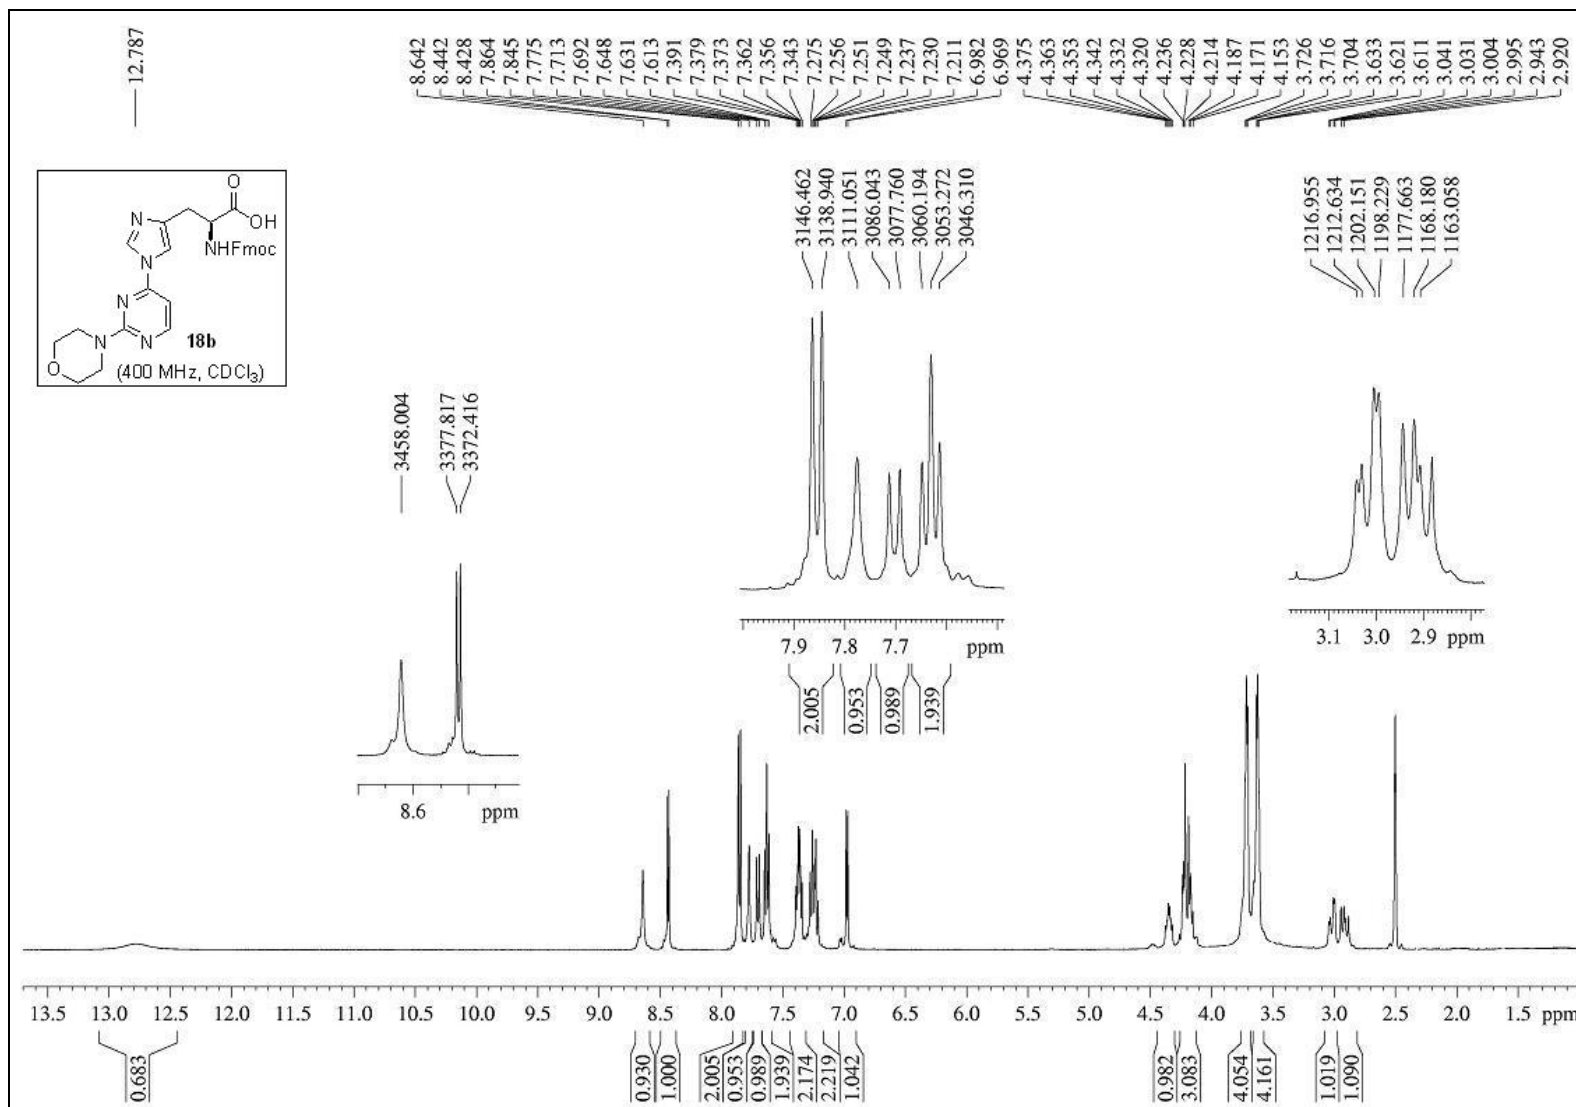

**$^{13}\text{C}$ -NMR and DEPT experiment of compound 18b**

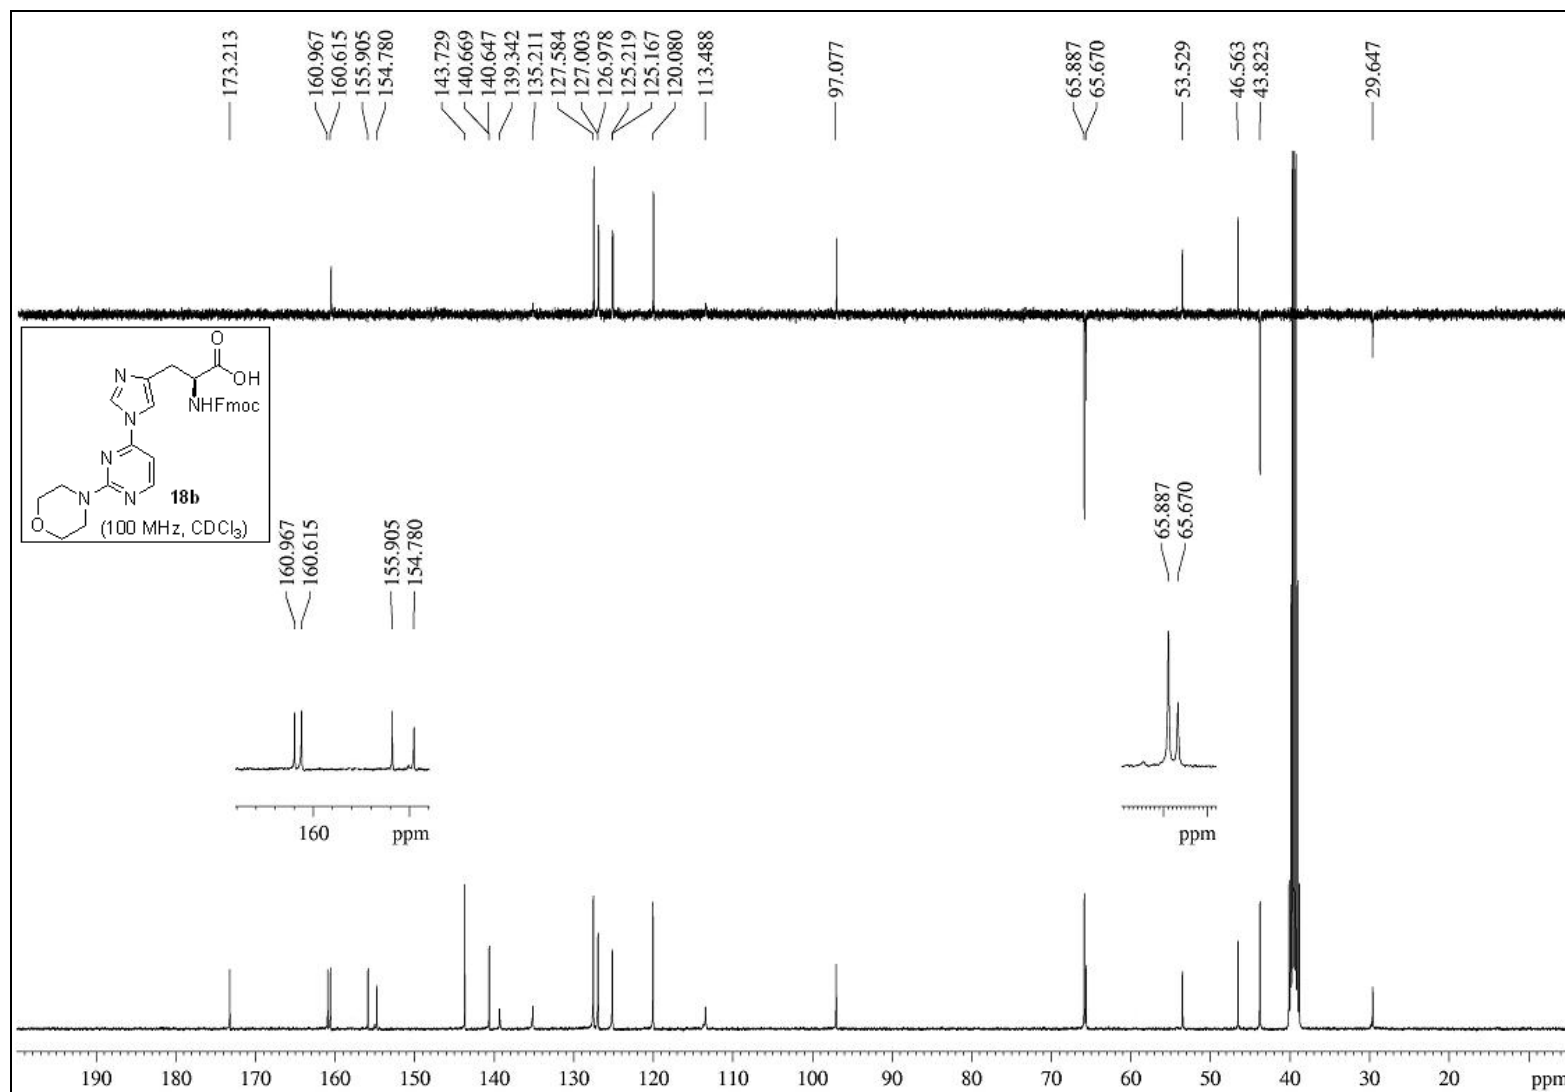

# <sup>1</sup>H-NMR of compound 18c

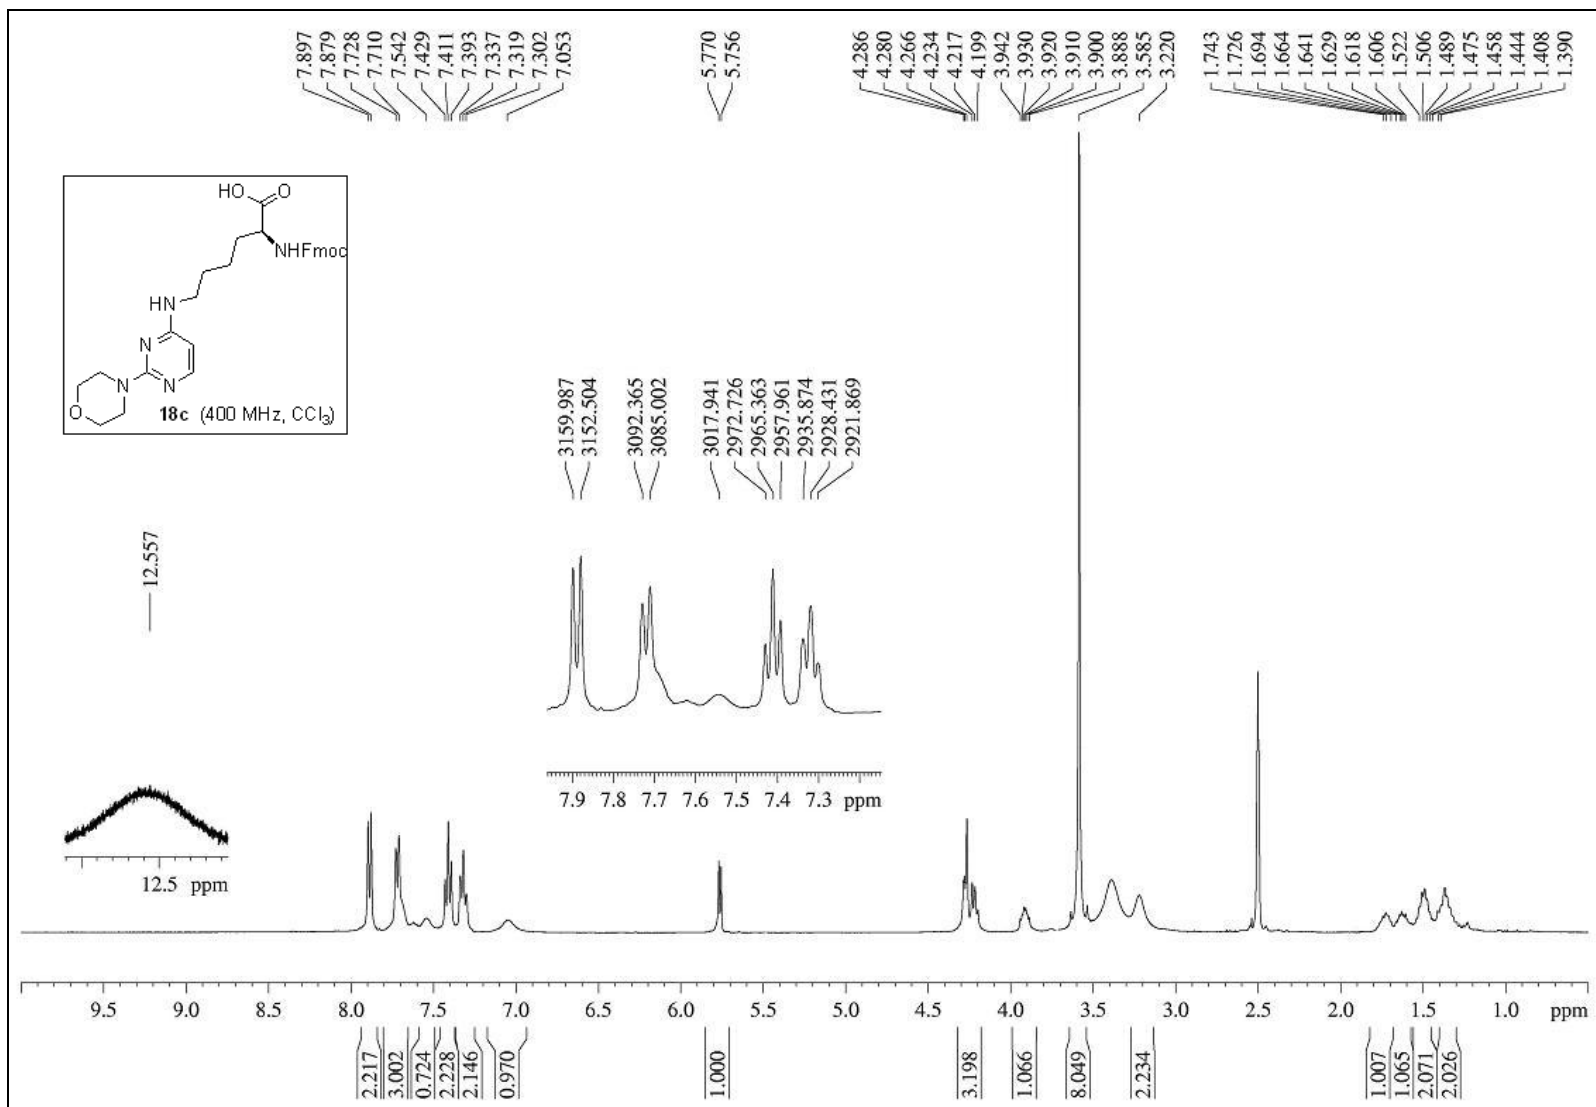

<sup>13</sup>C-NMR and DEPT experiment of compound **18c**

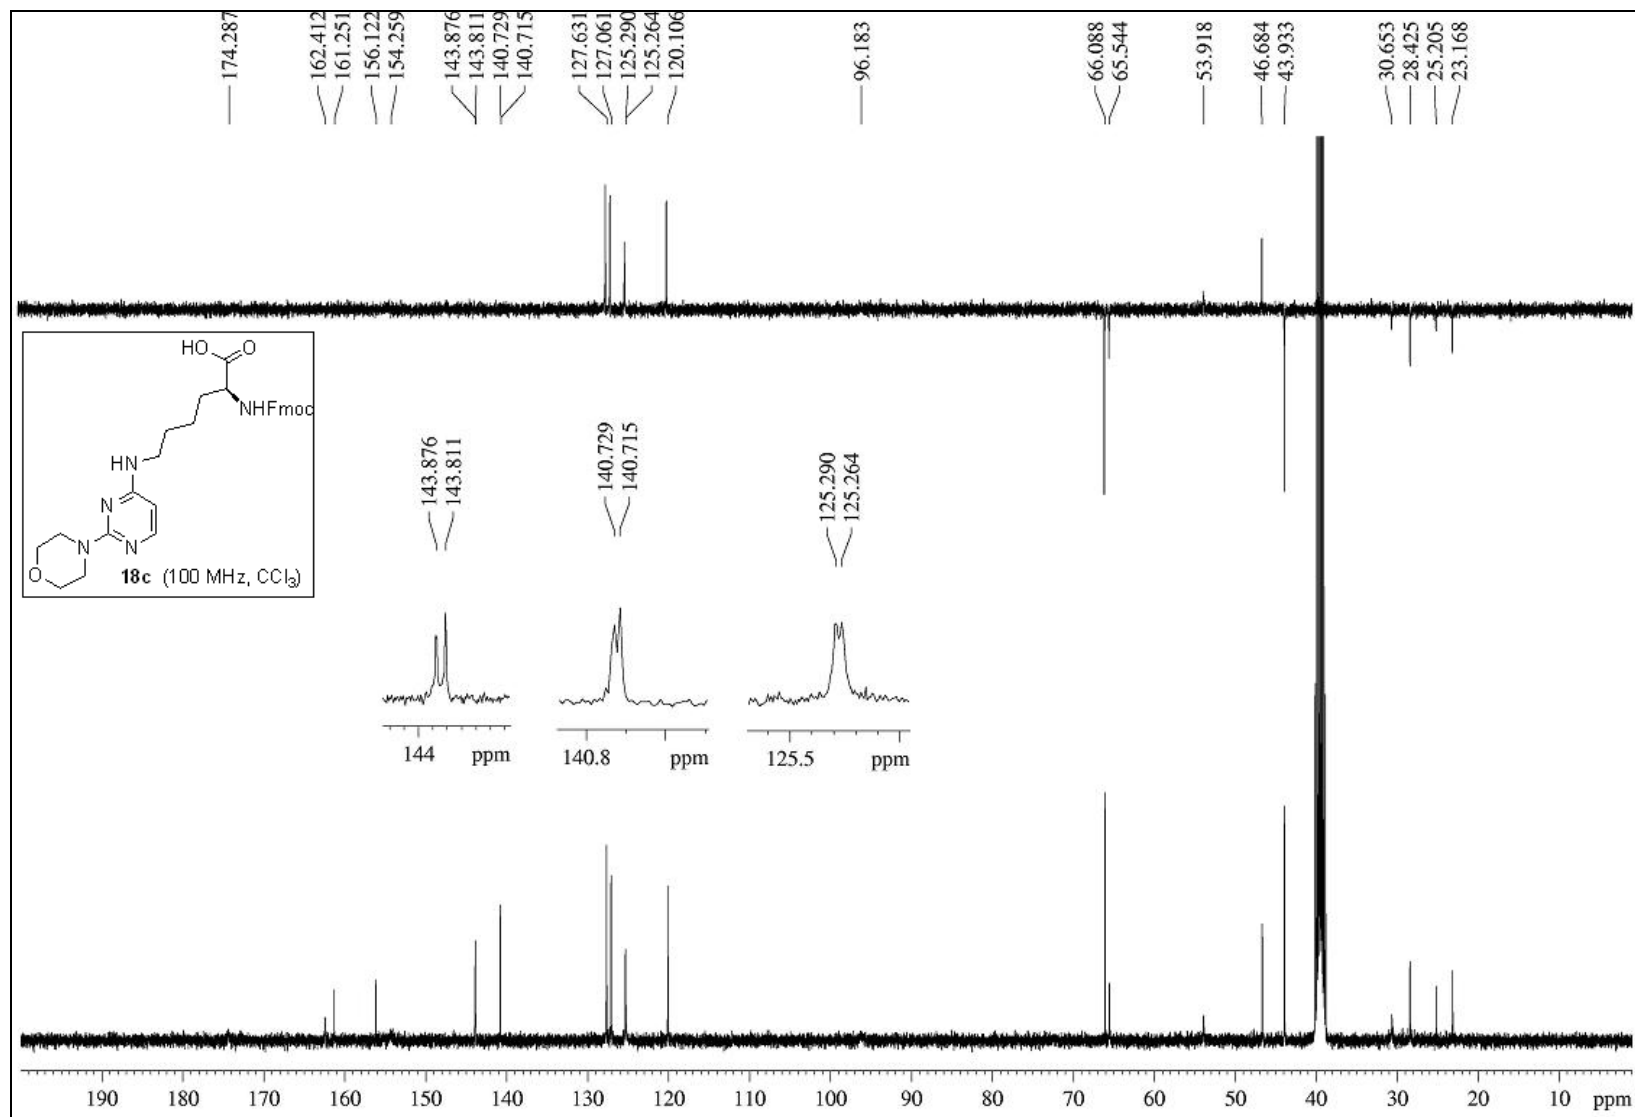

## HSQC-ed experiment of compound 18c

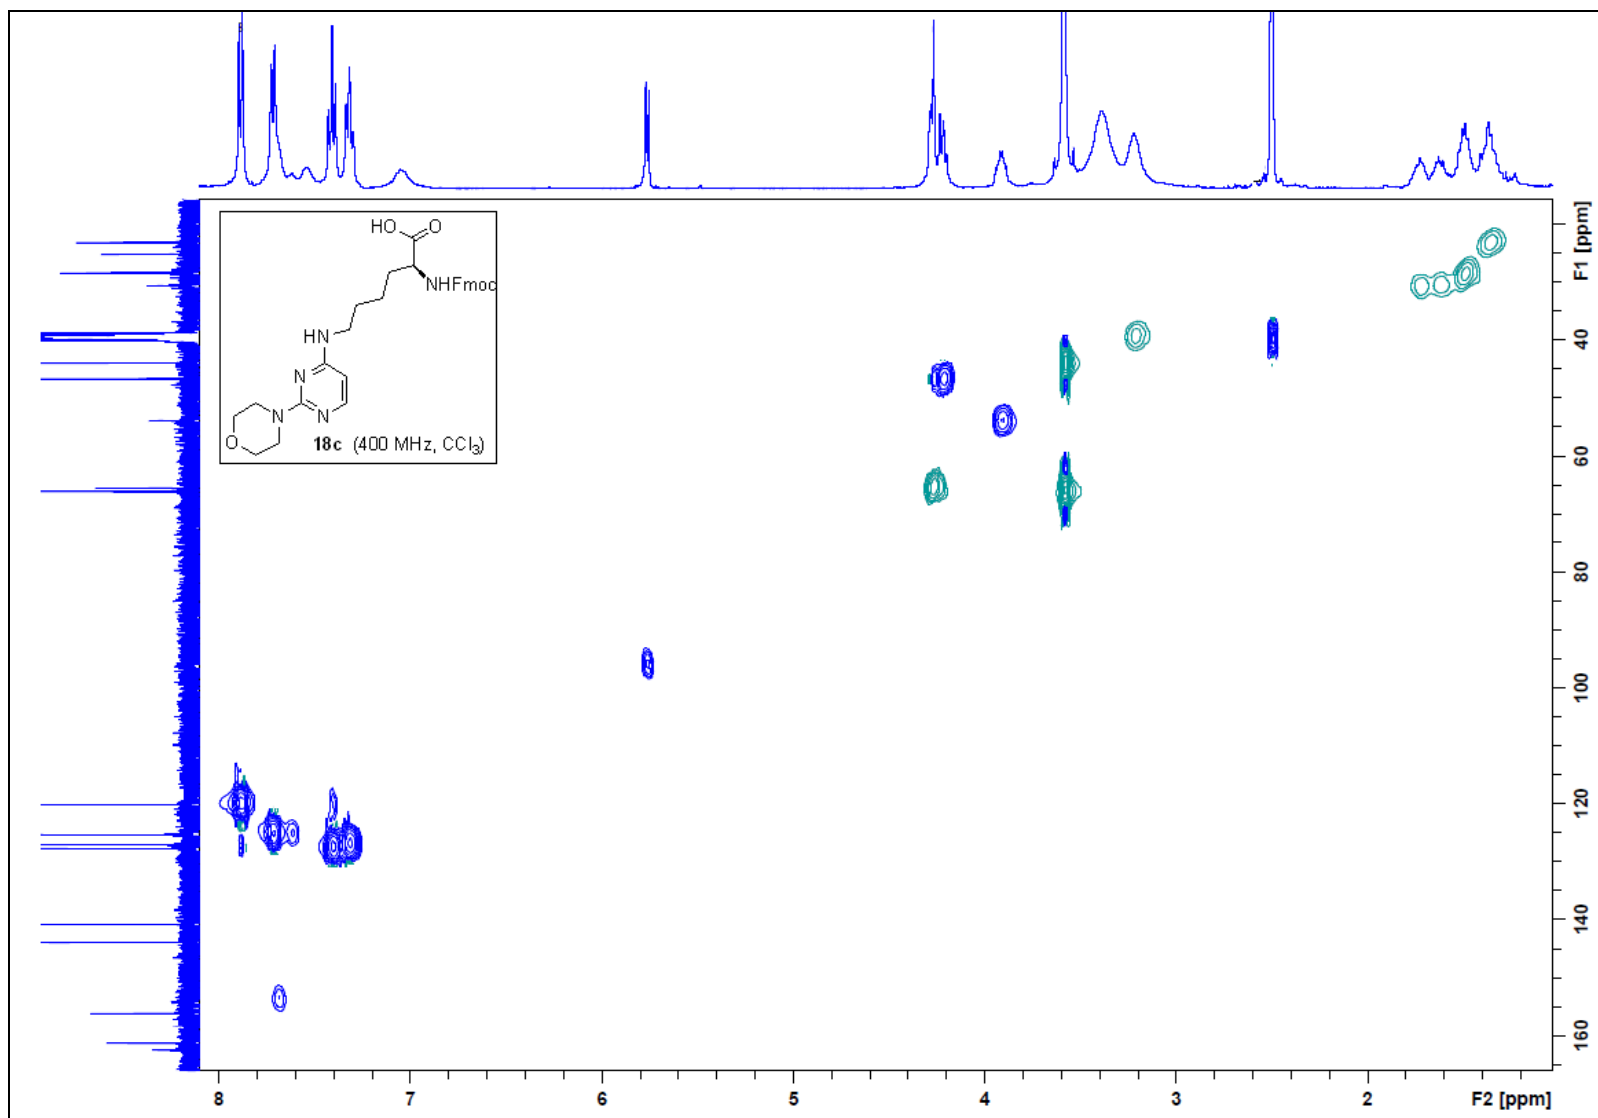

## NOESY experiment of compound 12b

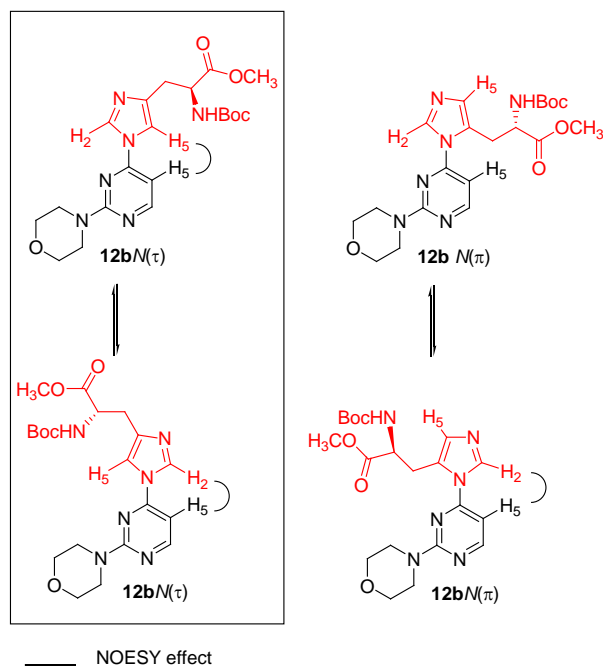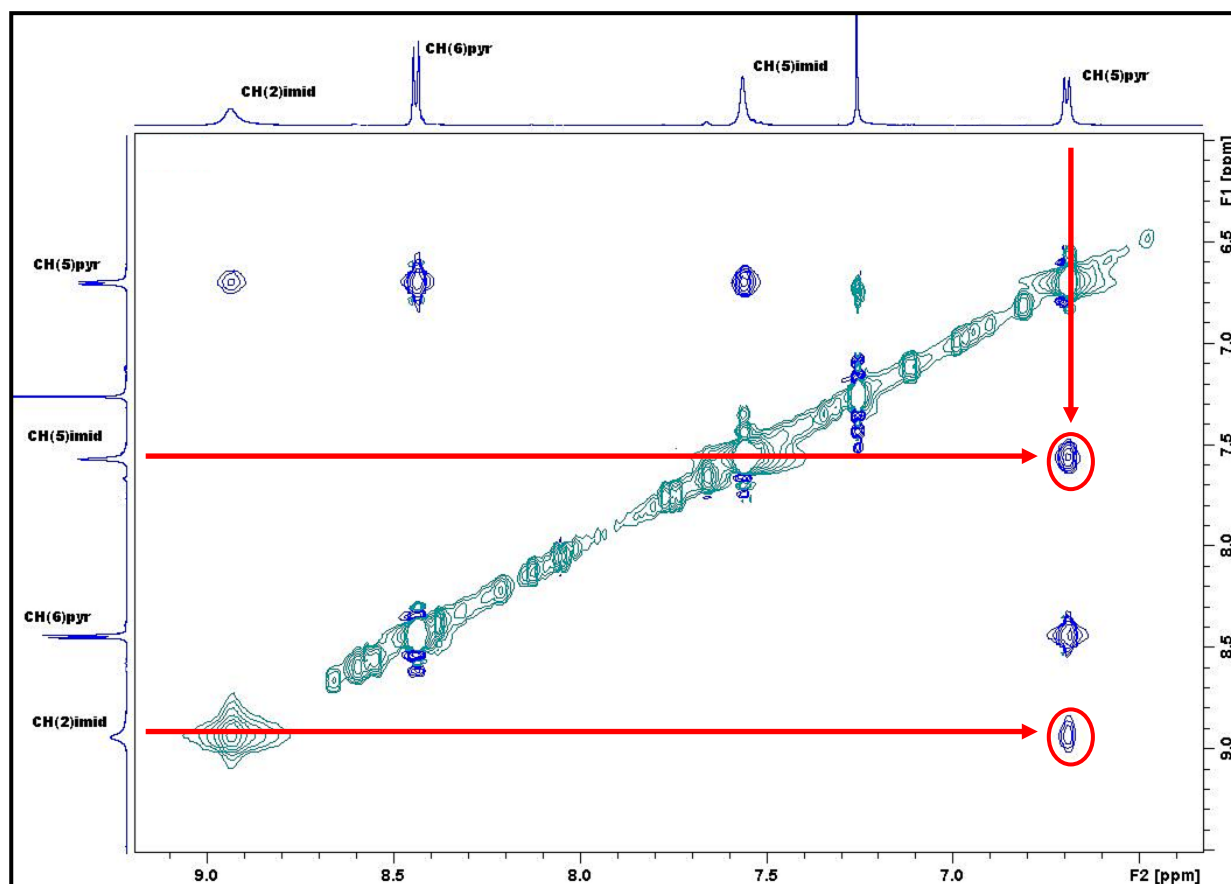

Supplement: c1ob05313b.pdf [file c1ob05313b.pdf]
